# Supplementary material for: Dynamic modeling of ABA-dependent expression of the Arabidopsis RD29A gene
Source: Frontiers journal article supplement (doi:10.3389/fpls.2022.928718), 2022-08-26
Supplement: Image_1.pdf [file Image_1.pdf]

## Supplemental Figures

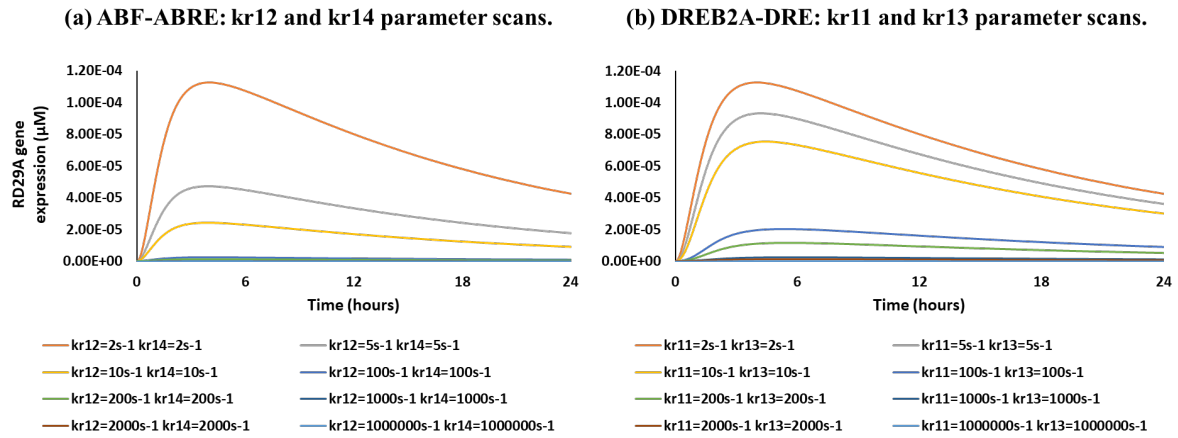

**Figure S1. Changes in the *RD29A* gene expression with a function of binding affinity.** The *RD29A* gene expression was stimulated with the alternated binding affinities, 2, 5, 10, 100, 200, 1000, 2000, and  $10^6$   $\mu\text{M}$  in (a) ABF-ABRE interaction (parameters kr12 and kr14) or (b) DREB2A-DRE interaction (parameters kr11 and kr13).
