# Supplementary material for: Dynamic modeling of ABA-dependent expression of the Arabidopsis RD29A gene
Source: Front Plant Sci. 2022 Aug 26;13:928718. doi: 10.3389/fpls.2022.928718 (PMC9458874; doi:10.3389/fpls.2022.928718)
Supplement: Supplementary file 1 [file Table_1.xlsx]

## Sheet: Explantion
Table S1. A list of genes in the ABA GRN (gene regulatry network) in Arabidopsis
Column name	Explanation
VP gene ID	Viewpoint (VP) gene ID; primary transcript models as representatives of each gene model
R03 lfc	Log2 fold change (lfc) of gene expression in root tissue ABA-treated for 3hr (R03), compared to control, for the VP gene
R24 lfc	lfc of gene expression in root tissue ABA-treated for 24hr (R24), compared to control, for the VP gene
S03 lfc	lfc of gene expression in shoot tissue ABA-treated for 3hr (S03), compared to control, for the VP gene
S24 lfc	lfc of gene expression in shoot tissue ABA-treated for 24hr (S24), compared to control, for the VP gene
R03 padj	Adjusted p-value (padj) for significance of different gene expression, for R03 lfc; gray shades indicate padj<0.05
R24 padj	Adjusted p-value (padj) for significance of different gene expression, for R24 lfc; gray shades indicate padj<0.05
S03 padj	Adjusted p-value (padj) for significance of different gene expression, for S03 lfc; gray shades indicate padj<0.05
S24 padj	Adjusted p-value (padj) for significance of different gene expression, for S24 lfc; gray shades indicate padj<0.05
short description	Descrption of the gene
ABRE @5pD	Number of DAP-seq peak coinciding with an ACGT, and with an ABRE in 5' distal (-2000 ~ -1001bp from the start of an ORF)
ABRE @5pP	Number of DAP-seq peak coinciding with an ACGT, and with an ABRE in 5' proximal (-1000 ~ -1 bp from the start of an ORF)
ABRE @gCDS	Number of DAP-seq peak coinciding with an ACGT, and with an ABRE in genomic coordinates for coding sequences (CDS)
ABRE @3pP	Number of DAP-seq peak coinciding with an ACGT, and with an ABRE in 3' proximal (+1 ~ +1000bp from the end of an ORF)
ABRE @3pD	Number of DAP-seq peak coinciding with an ACGT, and with an ABRE in 3' distal (+1001 ~ +2000bp from the end of an ORF)
ABRE number	A sum of ABREs @ 5pD, 5pP, gCDS, 3pP, and 3pD
list of genes in the "ABRE numbers in ABA GRN" tab is an extraction from Supplementary Data 2 in the publication by Sun et al. (2022): https://doi.org/10.1038/s41477-022-01139-5
Genes in which the padj is "NA" in all four samples (R03, R24, S03, and S24) are eliminated from the list.
Please refer to the article by Sun et al. for the details

## Sheet: ABRE numbers in ABA GRN
VP gene ID	R03 lfc	R24 lfc	S03 lfc	S24 lfc	R03 padj	R24 padj	S03 padj	S24 padj	short description	ABRE@5pD	ABRE @5pP	ABRE @gCDS	ABRE @3pP	ABRE @3pD	ABRE number
AT1G20860.2	4.58639	-0.0232621	-2.47906	0.156412	0.0110607	0.994242	NA	NA		-	-	1	-	-	1
AT5G24940.1	4.50697	0.0234699	NA	NA	3.02646e-05	0.991989	NA	NA	Protein phosphatase 2C family protein	-	1	-	-	-	1
AT5G52670.1	-5.42248	-0.292592	0.0552108	-2.25464	0.0114225	0.935765	NA	NA	Copper transport protein family	1	-	-	-	-	1
AT5G26080.1	-1.91631	-0.105756	0.0552068	-2.67264	0.00104541	0.917689	NA	NA	proline-rich family protein	-	-	-	1	-	1
AT5G20230.1	4.90734	-0.300393	0.328916	-1.00877	6.06877e-09	0.867185	NA	NA	blue-copper-binding protein	-	-	-	1	-	1
AT2G45220.1	1.62347	-0.149051	0.271817	-0.862208	2.23588e-06	0.826351	NA	NA	Plant invertase/pectin methylesterase inhibitor superfamily	-	-	1	-	-	1
AT1G48405.1	4.31093	0.75849	-3.26176	0.156412	0.0449518	0.812953	NA	NA	Kinase interacting (KIP1-like) family protein	1	-	-	-	-	1
AT4G36430.1	-1.0701	0.163619	0.844464	0.0323501	0.00078091	0.769563	NA	NA	Peroxidase superfamily protein	-	-	1	-	-	1
AT5G52260.1	1.74185	0.354697	NA	NA	0.0108293	0.76849	NA	NA	myb domain protein 19	-	1	-	-	-	1
AT1G26870.1	-1.27049	-0.249152	-3.13998	0.156412	0.00134521	0.698396	NA	NA	NAC (No Apical Meristem) domain transcriptional regulator superfamily protein	-	1	-	-	-	1
AT2G35990.1	-5.06288	-1.12996	NA	NA	0.0223489	0.690695	NA	NA	Putative lysine decarboxylase family protein	1	-	-	-	-	1
AT2G02580.1	-4.88677	-1.25277	NA	NA	0.0246574	0.662233	NA	NA	cytochrome P450, family 71, subfamily B, polypeptide 9	-	1	-	-	-	1
AT3G48010.1	5.26587	1.10809	NA	NA	0.00515852	0.624568	NA	NA	cyclic nucleotide-gated channel 16	-	-	1	-	-	1
AT1G65690.1	1.92487	0.476181	0.791964	0.545908	0.000153419	0.5497	NA	NA	Late embryogenesis abundant (LEA) hydroxyproline-rich glycoprotein family	-	1	-	-	-	1
AT5G58782.2	6.06091	2.49548	NA	NA	0.00933315	0.517103	NA	NA		-	-	1	-	-	1
AT5G55770.1	-2.08198	-0.705322	-2.89543	0.156412	0.00486298	0.462768	NA	NA	Cysteine/Histidine-rich C1 domain family protein	-	-	-	-	1	1
AT5G62165.1	1.31471	0.353027	3.68482	0.156412	6.95112e-07	0.331924	NA	NA	AGAMOUS-like 42	1	-	-	-	-	1
AT3G55870.3	8.61599	2.54621	3.89777	0.156412	3.72115e-10	0.303854	NA	NA		-	-	-	1	-	1
AT2G31470.1	-3.72315	-2.19227	NA	NA	0.0359752	0.29825	NA	NA	F-box and associated interaction domains-containing protein	-	-	-	-	1	1
AT4G14640.1	-0.79374	-0.458611	0.982765	0.156412	0.0188554	0.294786	NA	NA	calmodulin 8	1	-	-	-	-	1
AT2G21610.2	0.860845	0.519259	0.0552165	-1.67088	0.0320684	0.285979	NA	NA		-	1	-	-	-	1
AT5G16920.1	3.98092	1.50019	2.64247	1.10492	0.00338157	0.192952	NA	NA	Fasciclin-like arabinogalactan family protein	-	1	-	-	-	1
AT3G52970.2	6.01797	-3.98962	2.59041	0.156412	0.0139133	0.192229	NA	NA	cytochrome P450, family 76, subfamily G, polypeptide 1	-	-	-	1	-	1
AT4G33355.1	-4.89962	-4.0026	1.83752	0.156412	0.0460355	0.174803	NA	NA	Bifunctional inhibitor/lipid-transfer protein/seed storage 2S albumin superfamily protein	1	-	-	-	-	1
AT5G41090.1	4.67013	2.01715	0.0552191	1.71804	0.00113455	0.156595	NA	NA	NAC domain containing protein 95	-	-	-	1	-	1
AT2G42660.1	-1.56298	-0.811048	-3.22691	-2.26169	0.000199619	0.0906519	NA	NA	Homeodomain-like superfamily protein	-	-	1	-	-	1
AT1G53935.1	-3.78259	-2.66053	0.0552166	1.96778	0.0139607	0.0724617	NA	NA		1	-	-	-	-	1
AT1G04445.2	0.0846152	-2.16427	-1.33892	0.180598	0.947423	0.0459221	NA	NA		-	-	1	-	-	1
AT2G02620.1	-1.84744	-1.23474	-3.05318	-2.28673	0.00107922	0.0448261	NA	NA	Cysteine/Histidine-rich C1 domain family protein	-	1	-	-	-	1
AT1G48325.1	3.40665	1.81002	1.38064	0.903206	7.37451e-05	0.0432988	NA	NA	Expressed protein	-	-	-	1	-	1
AT2G46480.4	-0.385058	-2.62979	NA	NA	0.778089	0.0401605	NA	NA		-	1	-	-	-	1
AT3G50710.1	-1.30098	-3.61273	NA	NA	0.387556	0.0401072	NA	NA	F-box/RNI-like/FBD-like domains-containing protein	-	-	-	-	1	1
AT1G24320.1	-1.05507	-0.846549	-1.57244	-3.02752	0.00463975	0.0382159	NA	NA	Six-hairpin glycosidases superfamily protein	-	-	1	-	-	1
AT5G38790.1	-0.803254	-1.25734	1.8375	1.96778	0.171402	0.0370026	NA	NA		-	-	-	1	-	1
AT5G54000.2	5.89386	5.93214	2.18273	2.85904	0.0223024	0.036641	NA	NA		-	-	-	1	-	1
AT2G26940.1	1.1971	2.85524	-0.610647	1.10491	0.446615	0.0289573	NA	NA	C2H2-type zinc finger family protein	-	-	1	-	-	1
AT5G55780.1	-1.34216	-1.02531	-3.41878	-0.724931	0.00113303	0.0272163	NA	NA	Cysteine/Histidine-rich C1 domain family protein	1	-	-	-	-	1
AT1G33670.1	-1.30572	-1.53672	-2.15106	1.10491	0.0393389	0.0251826	NA	NA	Leucine-rich repeat (LRR) family protein	-	-	-	1	-	1
AT2G31081.1	-0.735984	-1.89125	-0.78225	0.156412	0.327493	0.02191	NA	NA	CLAVATA3/ESR-RELATED 4	-	-	-	-	1	1
AT5G04730.1	-1.31417	-5.24307	NA	NA	0.610571	0.0182938	NA	NA	Ankyrin-repeat containing protein	-	-	1	-	-	1
AT3G17600.1	-0.489442	-1.47104	NA	NA	0.495845	0.0180403	NA	NA	indole-3-acetic acid inducible 31	1	-	-	-	-	1
AT1G61950.1	-2.582	-1.77178	NA	NA	0.0003263	0.01616	NA	NA	calcium-dependent protein kinase 19	-	1	-	-	-	1
AT5G58784.1	-0.257197	-0.851251	0.0552063	-2.71454	0.532853	0.0161567	NA	NA	Undecaprenyl pyrophosphate synthetase family protein	-	-	-	1	-	1
AT4G22210.2	-7.58123	-8.3399	NA	NA	0.0189832	0.0157452	NA	NA		1	-	-	-	-	1
AT2G02310.1	-2.08306	-5.14902	NA	NA	0.268746	0.0152451	NA	NA	phloem protein 2-B6	-	-	1	-	-	1
AT1G33320.1	-2.68794	-2.44979	NA	NA	0.00413511	0.0149205	NA	NA	Pyridoxal phosphate (PLP)-dependent transferases superfamily protein	-	-	-	1	-	1
AT5G27810.1	-2.07355	-4.18885	-2.203	-1.34046	0.0863308	0.0117142	NA	NA	MADS-box transcription factor family protein	-	-	-	1	-	1
AT2G37810.1	-4.20485	-6.39753	0.0551915	-2.26949	0.0911796	0.010902	NA	NA	Cysteine/Histidine-rich C1 domain family protein	-	-	1	-	-	1
AT4G09100.1	-0.0378646	-2.11625	0.0552623	0.156412	0.983287	0.00813246	NA	NA	RING/U-box superfamily protein	-	-	-	-	1	1
AT2G45550.1	0.706152	-5.84071	NA	NA	0.743503	0.00611654	NA	NA	cytochrome P450, family 76, subfamily C, polypeptide 4	-	-	1	-	-	1
AT5G11570.1	-1.23339	-1.24264	2.94963	-2.2617	0.00548231	0.0060088	NA	NA	Major facilitator superfamily protein	-	-	-	-	1	1
AT4G26770.1	0.981672	0.851844	3.59241	-1.67088	0.000884773	0.00541665	NA	NA	Phosphatidate cytidylyltransferase family protein	-	1	-	-	-	1
AT5G25910.1	-0.0307003	-1.50298	0.152101	-0.0586803	0.97846	0.00386264	NA	NA	receptor like protein 52	-	-	1	-	-	1
AT1G53970.1	-3.8561	-7.28415	NA	NA	0.113857	0.00381559	NA	NA		-	-	1	-	-	1
AT1G24485.3	-4.60016	-3.59543	NA	NA	0.00101242	0.00325301	NA	NA		1	-	-	-	-	1
AT1G76210.1	1.27385	1.91276	1.73387	-1.67148	0.0843356	0.002842	NA	NA	Arabidopsis protein of unknown function (DUF241)	-	-	1	-	-	1
AT3G60090.1	0.553322	2.6851	0.055225	1.10492	0.661795	0.0027328	NA	NA	VQ motif-containing protein	-	-	1	-	-	1
AT1G69120.1	2.71697	7.72461	NA	NA	0.333351	0.00102818	NA	NA	K-box region and MADS-box transcription factor family protein	1	-	-	-	-	1
AT5G50270.1	-0.835412	6.97502	NA	NA	0.805207	0.00101751	NA	NA	F-box/RNI-like/FBD-like domains-containing protein	-	-	-	-	1	1
AT1G54950.1	-3.67431	-7.75647	0.0552068	-2.66904	0.0697036	0.000787692	NA	NA		-	-	-	1	-	1
AT2G43220.1	-3.36985	-3.8205	-2.35136	-3.25626	0.0021082	0.000611183	NA	NA	Cysteine/Histidine-rich C1 domain family protein	-	-	1	-	-	1
AT3G62380.1	6.97309	5.69971	NA	NA	2.74538e-06	0.000440906	NA	NA		-	1	-	-	-	1
AT1G62770.1	0.12482	-1.12509	0.391323	-0.476951	0.763035	0.000289154	NA	NA	Plant invertase/pectin methylesterase inhibitor superfamily protein	-	-	-	1	-	1
AT1G51870.2	-2.73344	-3.08224	2.37741	-2.2617	0.00278655	0.000288763	NA	NA		-	-	1	-	-	1
AT5G02360.1	-0.856637	-1.17176	-3.22691	-2.26169	0.00611595	0.000238333	NA	NA	DC1 domain-containing protein	-	-	-	-	1	1
AT4G15300.1	-3.49375	-2.86121	-2.79636	0.156412	2.79307e-06	0.000211868	NA	NA	cytochrome P450, family 702, subfamily A, polypeptide 2	-	-	1	-	-	1
AT3G03240.1	7.41847	8.33847	0.055183	-0.399095	0.000578798	0.000174094	NA	NA	alpha/beta-Hydrolases superfamily protein	-	1	-	-	-	1
AT4G26880.1	2.46203	2.13299	1.017	-0.805375	4.76113e-06	0.000129457	NA	NA	Stigma-specific Stig1 family protein	-	-	1	-	-	1
AT4G22217.1	-0.753698	1.47721	0.055212	2.44853	0.122275	3.31741e-05	NA	NA	Arabidopsis defensin-like protein	-	1	-	-	-	1
AT3G22250.1	-1.72252	-2.55769	NA	NA	0.00323107	3.25409e-05	NA	NA	UDP-Glycosyltransferase superfamily protein	-	-	1	-	-	1
AT2G25410.1	-3.17747	-6.89732	-2.80502	0.156412	0.00373717	2.11648e-05	NA	NA	RING/U-box superfamily protein	-	-	-	-	1	1
AT2G14210.2	4.48021	8.48692	NA	NA	0.0343616	2.09317e-05	NA	NA		-	1	-	-	-	1
AT3G51570.1	-2.21074	-4.79161	-2.47906	0.156412	0.00235175	8.39288e-06	NA	NA	Disease resistance protein (TIR-NBS-LRR class) family	1	-	-	-	-	1
AT1G23160.1	-1.56073	-2.66922	-1.57242	0.156412	0.00732789	4.96435e-06	NA	NA	Auxin-responsive GH3 family protein	-	-	1	-	-	1
AT1G58320.1	0.123815	-8.5449	NA	NA	0.963042	4.74739e-06	NA	NA	PLAC8 family protein	-	-	1	-	-	1
AT3G30842.1	3.7831	4.6142	-1.57244	3.46777	0.0016407	3.97914e-06	NA	NA	pleiotropic drug resistance 10	-	1	-	-	-	1
AT5G09210.1	6.94207	3.51383	3.10935	0.156412	5.73613e-07	2.61595e-06	NA	NA	GC-rich sequence DNA-binding factor-like protein	-	-	-	-	1	1
AT5G09720.1	-6.48454	-7.21788	NA	NA	4.26676e-06	4.18429e-07	NA	NA	Magnesium transporter CorA-like family protein	1	-	-	-	-	1
AT1G05250.1	-2.4604	-1.84172	-6.49999	-5.02221	3.02733e-13	1.44135e-07	NA	NA	Peroxidase superfamily protein	1	-	-	-	-	1
AT4G37950.1	-7.57781	-7.74317	NA	NA	4.73894e-08	4.5261e-08	NA	NA	Rhamnogalacturonate lyase family protein	-	-	1	-	-	1
AT1G53635.1	-2.5234	-4.25698	-1.88685	-1.71376	5.48779e-05	1.23325e-08	NA	NA		-	1	-	-	-	1
AT1G53640.1	-7.55918	-7.88442	0.0552036	-2.99786	1.16173e-08	4.60273e-09	NA	NA		-	-	-	-	1	1
AT2G02690.1	-1.9311	-2.10098	-3.35336	0.156412	1.19326e-07	2.83881e-09	NA	NA	Cysteine/Histidine-rich C1 domain family protein	-	-	-	-	1	1
AT1G33840.1	-6.37037	-8.30171	-1.57242	0.156412	2.70405e-07	2.70557e-09	NA	NA	Protein of unknown function (DUF567)	-	-	1	-	-	1
AT3G50460.1	-8.87506	-9.40104	-1.74405	-3.08139	9.88297e-12	9.91738e-13	NA	NA	homolog of RPW8 2	-	1	-	-	-	1
AT4G22110.1	-1.99695	-2.54248	-2.79636	0.156412	4.39865e-11	1.66279e-15	NA	NA	GroES-like zinc-binding dehydrogenase family protein	-	-	-	1	-	1
AT5G42480.1	-0.533097	-0.0239694	-0.342467	-1.28868e-05	1.66152e-05	0.927634	0.216664	0.999981	Chaperone DnaJ-domain superfamily protein	-	-	1	-	-	1
AT1G51850.2	-1.61089	-1.65591	-0.0854927	0.00209154	2.9604e-06	2.81394e-06	0.98865	0.999674		1	-	-	-	-	1
AT2G23130.1	-0.723352	-0.695066	-0.00613806	0.000738566	0.0379237	0.067604	0.995216	0.999362	arabinogalactan protein 17	1	-	-	-	-	1
AT3G61160.2	1.01912	0.276057	0.706588	-0.000972564	1.93716e-07	0.28322	0.211714	0.999244	Protein kinase superfamily protein	1	-	-	-	-	1
AT3G12640.2	0.849952	0.381604	0.0666419	-0.000378267	4.97659e-29	2.01417e-06	0.825275	0.999148		-	-	-	-	1	1
AT2G45280.2	-0.647599	0.42225	-0.123298	-0.00215735	0.0125281	0.13111	0.933213	0.998937	RAS associated with diabetes protein 51C	-	-	-	1	-	1
AT4G14980.1	-0.86339	-0.0187426	-0.503207	-0.00494315	0.0250664	0.983043	0.817807	0.998801	Cysteine/Histidine-rich C1 domain family protein	1	-	-	-	-	1
AT5G32470.1	0.468471	0.113336	0.0110684	0.000874191	8.18258e-05	0.534362	0.97716	0.998519	Haem oxygenase-like, multi-helical	-	-	1	-	-	1
AT1G11755.1	-0.55111	0.0137201	-0.416605	-0.00152958	0.0263623	0.9807	0.21224	0.998295	Undecaprenyl pyrophosphate synthetase family protein	-	-	-	-	1	1
AT3G12830.1	0.793743	-0.0350346	0.906412	-0.0032341	0.000439405	0.946983	0.200413	0.998295	SAUR-like auxin-responsive protein family	-	-	-	1	-	1
AT1G26900.1	-0.444644	-0.208661	-0.354457	0.00190107	0.0382254	0.47516	0.402228	0.998219	Pentatricopeptide repeat (PPR) superfamily protein	-	1	-	-	-	1
AT2G40000.1	1.55528	-0.545274	0.0348488	-0.00381349	1.20628e-06	0.196699	0.976745	0.997704	ortholog of sugar beet HS1 PRO-1 2	-	1	-	-	-	1
AT5G18310.2	-0.48977	-0.601381	-0.156409	-0.00491689	0.0665812	0.0332493	0.915215	0.997704		-	-	1	-	-	1
AT1G75540.1	-0.507471	-0.381803	-0.294524	-0.00238413	0.00828569	0.0871526	0.517684	0.997704	salt tolerance homolog2	-	-	-	1	-	1
AT3G03490.1	0.706985	-0.0739355	0.231277	0.00187038	1.0489e-11	0.679274	0.498675	0.997704	peroxin 19-1	-	-	-	1	-	1
AT5G62760.1	0.327641	0.115397	-0.259422	0.00183529	0.0309438	0.61288	0.475589	0.997704	P-loop containing nucleoside triphosphate hydrolases superfamily protein	1	-	-	-	-	1
AT1G10340.1	-3.26027	-5.14718	0.176807	0.0175876	0.0712782	0.00544789	0.972009	0.997623	Ankyrin repeat family protein	1	-	-	-	-	1
AT1G17590.1	-0.135761	0.890321	-0.548256	0.00342391	0.637292	6.67235e-06	0.293588	0.997489	nuclear factor Y, subunit A8	-	-	-	1	-	1
AT1G01180.1	-0.544517	-1.36232	0.0553269	0.00336262	0.0729555	1.79161e-06	0.948302	0.997418	S-adenosyl-L-methionine-dependent methyltransferases superfamily protein	-	-	-	-	1	1
AT1G31780.1	0.277968	0.131497	0.199724	-0.00120741	0.00345007	0.293003	0.186106	0.997392		-	-	-	-	1	1
AT1G15720.1	-0.0389602	0.398684	-0.87193	0.00346565	0.93671	0.297706	0.02978	0.997285	TRF-like 5	-	-	-	1	-	1
AT5G42900.1	2.08289	2.39846	0.693526	-0.0242507	0.0102511	0.00468614	0.882616	0.996959	cold regulated gene 27	-	1	-	-	-	1
AT1G15880.1	0.222949	-0.46443	0.419532	-0.00293207	0.22719	0.00871074	0.232248	0.996959	golgi snare 11	-	-	1	-	-	1
AT1G54730.2	-2.96412	-1.38509	-0.459626	-0.0026214	2.82255e-16	0.000222365	0.117257	0.996959	Major facilitator superfamily protein	-	-	-	1	-	1
AT1G32330.1	0.427601	0.262679	0.0556346	-0.00335022	0.00362689	0.140453	0.920895	0.996769	heat shock transcription factor A1D	-	1	-	-	-	1
AT2G41180.1	-1.69416	-0.497811	-0.65708	0.00678597	0.00260478	0.500413	0.28275	0.996217	VQ motif-containing protein	-	1	-	-	-	1
AT5G35320.1	0.810856	0.476663	0.279336	-0.005061	6.3693e-06	0.0202265	0.603537	0.99606		1	-	-	-	-	1
AT4G29960.1	0.228875	-0.160254	0.172825	0.00404276	0.0456494	0.25349	0.705081	0.99606		-	1	-	-	-	1
AT3G55770.7	0.0287339	-0.320058	0.168274	0.00285842	0.889892	0.0365925	0.558662	0.996037	GATA type zinc finger transcription factor family protein	-	-	-	1	-	1
AT3G56930.1	0.567434	-0.134125	0.525559	0.00351387	0.00147601	0.64374	0.0340985	0.996037	DHHC-type zinc finger family protein	-	-	-	1	-	1
AT2G30150.2	0.617057	0.676772	-0.0373997	-0.00304527	0.0393231	0.0322947	0.932455	0.995959		-	-	1	-	-	1
AT1G73150.1	-0.479957	-0.153776	-0.231813	0.00473678	0.0182842	0.600068	0.637983	0.995959	global transcription factor group E3	-	1	-	-	-	1
AT5G50750.1	3.90804	2.88385	-0.540777	0.0148149	0.0200682	0.0015855	0.766486	0.995895	reversibly glycosylated polypeptide 4	-	-	-	-	1	1
AT2G39740.1	-0.51491	-0.189889	-0.239907	-0.00483861	0.00100874	0.361272	0.62267	0.995895	Nucleotidyltransferase family protein	-	-	-	-	1	1
AT4G03210.1	-1.6325	-0.594962	0.415269	-0.00644152	6.50064e-14	0.0150592	0.475978	0.995895	xyloglucan endotransglucosylase/hydrolase 9	-	1	-	-	-	1
AT4G30850.1	2.70418	0.268569	2.08606	0.00697464	2.00711e-31	0.467031	6.58988e-09	0.995895	heptahelical transmembrane protein2	-	1	-	-	-	1
AT5G43100.1	0.310712	-0.304577	0.134995	-0.00516514	0.010363	0.0209157	0.802485	0.99586	Eukaryotic aspartyl protease family protein	-	1	-	-	-	1
AT3G07960.1	0.678989	0.145756	-0.298831	0.00974884	0.0102194	0.747599	0.74494	0.995455	Phosphatidylinositol-4-phosphate 5-kinase family protein	-	1	-	-	-	1
AT2G15290.1	-0.249076	0.2037	-0.105648	0.00401455	0.0476031	0.153972	0.786323	0.995366	translocon at inner membrane of chloroplasts 21	-	-	-	-	1	1
AT4G12770.1	0.354382	-0.0588485	0.0807316	-0.00294519	0.00238285	0.778029	0.77112	0.995366	Chaperone DnaJ-domain superfamily protein	1	-	-	-	-	1
AT1G49570.1	-1.74059	1.14578	-3.00895	0.061529	0.0300713	0.253664	0.525958	0.995366	Peroxidase superfamily protein	-	-	1	-	-	1
AT4G34350.1	1.51397	0.291876	0.254747	-0.00501429	1.45465e-20	0.188406	0.472957	0.995266	4-hydroxy-3-methylbut-2-enyl diphosphate reductase	-	-	1	-	-	1
AT3G19440.1	-0.935622	0.0752903	-1.57232	-0.00775237	3.27866e-07	0.821541	1.95562e-05	0.995266	Pseudouridine synthase family protein	-	-	-	1	-	1
AT4G19700.1	1.03071	0.918312	0.00229261	-0.0125293	1.2589e-06	3.05752e-05	0.999211	0.995139	SBP (S-ribonuclease binding protein) family protein	1	-	-	-	-	1
AT3G11945.2	-0.427966	-0.397536	0.203522	-0.00494558	0.0196524	0.0420188	0.567998	0.995139	homogentisate prenyltransferase	-	-	1	-	-	1
AT5G44240.1	0.402313	0.119733	0.0815897	-0.00703961	6.08744e-06	0.335754	0.905799	0.994613	aminophospholipid ATPase 2	-	-	1	-	-	1
AT5G49110.2	-0.614279	0.0469002	-0.19916	-0.0127582	0.0399376	0.939951	0.853582	0.99403		-	1	-	-	-	1
AT4G27740.1	-1.00812	-1.91882	0.0884503	-0.0173335	0.00248112	1.69814e-09	0.956007	0.99381	Yippee family putative zinc-binding protein	1	-	-	-	-	1
AT2G37040.1	0.6543	-0.0511381	0.276034	-0.029149	0.0213205	0.933865	0.913224	0.99381	PHE ammonia lyase 1	-	-	1	-	-	1
AT5G23280.1	-0.632843	0.186381	-0.189866	0.00696326	0.000402761	0.461219	0.672066	0.99381	TCP family transcription factor	-	1	-	-	-	1
AT1G51720.1	0.572554	0.338592	-0.158683	0.00367414	5.14371e-09	0.00115883	0.455091	0.99381	Amino acid dehydrogenase family protein	-	-	1	-	-	1
AT3G54130.1	1.055	0.397207	0.370875	0.00730928	2.23703e-08	0.0908343	0.346607	0.99381	Josephin family protein	-	1	-	-	-	1
AT1G28815.1	2.72271	-0.252911	1.95505	-0.0411487	1.17625e-10	0.756233	0.322012	0.99381		-	-	1	-	-	1
AT1G71697.1	0.634798	-0.337649	0.479851	0.0207493	0.0328342	0.405317	0.727989	0.993619	choline kinase 1	-	1	-	-	-	1
AT4G21470.1	0.855808	0.318604	0.75478	-0.00796257	2.3084e-05	0.232443	0.016065	0.99354	riboflavin kinase/FMN hydrolase	-	-	-	1	-	1
AT5G10050.1	0.37198	-0.0658086	0.158778	0.00733449	0.013838	0.803588	0.74013	0.993533	NAD(P)-binding Rossmann-fold superfamily protein	-	-	-	1	-	1
AT3G09600.1	2.20767	1.19697	-0.619111	0.0181926	1.62317e-05	0.0463582	0.537525	0.993533	Homeodomain-like superfamily protein	1	-	-	-	-	1
AT5G41560.1	0.992159	0.166242	0.369688	-0.00735955	1.54123e-07	0.588431	0.282395	0.993533		-	1	-	-	-	1
AT5G42440.1	-1.36902	-1.00719	0.0439252	-0.0246433	0.00698422	0.0784038	0.980878	0.993527	Protein kinase superfamily protein	-	1	-	-	-	1
AT5G38590.2	0.565906	0.12053	-0.027062	0.0112266	0.0203631	0.769642	0.974497	0.993527	F-box/RNI-like/FBD-like domains-containing protein	-	1	-	-	-	1
AT5G48657.5	0.129665	-0.892898	0.382123	0.0673374	0.793339	0.0256099	0.944939	0.993527		-	-	-	1	-	1
AT5G15650.1	0.377987	0.252972	0.0442903	0.00804091	0.00439298	0.109346	0.924498	0.993527	reversibly glycosylated polypeptide 2	-	1	-	-	-	1
AT3G26980.1	-0.607203	-0.535966	0.0924817	-0.00991801	0.000174799	0.000795476	0.882923	0.993527	membrane-anchored ubiquitin-fold protein 4 precursor	-	-	-	-	1	1
AT2G40180.1	0.896225	-2.27875	0.489799	-0.0503013	0.427008	0.0481608	0.862474	0.993527	phosphatase 2C5	1	-	-	-	-	1
AT5G01020.1	-0.490467	-0.285601	-0.0683325	0.00463328	0.000199921	0.061458	0.836033	0.993527	Protein kinase superfamily protein	1	-	-	-	-	1
AT5G61540.1	-0.685892	-0.521785	-0.29475	-0.0217865	0.0335258	0.137388	0.792695	0.993527	N-terminal nucleophile aminohydrolases (Ntn hydrolases) superfamily protein	1	-	-	-	-	1
AT2G42040.1	-0.647965	-0.526156	-0.194023	-0.0121801	0.00562036	0.0361478	0.792436	0.993527		-	1	-	-	-	1
AT5G10470.2	-0.753816	-0.420443	-0.0930026	0.00569097	7.43055e-06	0.0288416	0.75789	0.993527	kinesin like protein for actin based chloroplast movement 1	-	-	1	-	-	1
AT5G26340.1	2.51222	2.57224	0.752002	-0.0420413	2.52691e-12	1.53487e-12	0.684658	0.993527	Major facilitator superfamily protein	-	-	1	-	-	1
AT4G18050.2	0.294302	0.575846	0.24791	0.011957	0.309266	0.0335849	0.631986	0.993527		1	-	-	-	-	1
AT3G57390.1	0.507174	0.125516	-0.314661	-0.0122443	0.0163711	0.71896	0.512548	0.993527	AGAMOUS-like 18	-	-	-	-	1	1
AT2G38920.1	3.88764	1.48515	5.0248	0.156413	9.76389e-09	0.0366327	0.400621	0.993527	SPX (SYG1/Pho81/XPR1) domain-containing protein / zinc finger (C3HC4-type RING finger) protein-related	-	1	-	-	-	1
AT1G68290.1	0.978849	-0.1716	1.0548	0.0274325	0.0421583	0.847421	0.385369	0.993527	endonuclease 2	-	-	-	-	1	1
AT3G12820.1	-2.24569	-2.59078	-2.03968	0.035994	0.000363861	5.7056e-06	0.299889	0.993527	myb domain protein 10	-	-	-	1	-	1
AT1G16680.1	-0.518507	-0.229827	-0.335362	-0.0082164	3.7477e-05	0.115914	0.283938	0.993527	Chaperone DnaJ-domain superfamily protein	-	-	1	-	-	1
AT2G38610.1	0.513852	0.384844	0.328691	-0.00636958	1.4496e-06	0.000490993	0.230372	0.993527	RNA-binding KH domain-containing protein	-	1	-	-	-	1
AT3G09840.1	0.489992	0.0798469	0.282513	-0.00442977	5.20401e-06	0.661869	0.11087	0.993527	cell division cycle 48	-	-	1	-	-	1
AT2G46500.1	1.40609	0.387861	0.657244	0.0134139	7.27004e-26	0.0147228	0.110244	0.993527	phosphoinositide 4-kinase gamma 4	-	1	-	-	-	1
AT1G32410.1	0.828664	0.305419	0.65568	0.013538	7.91545e-05	0.279351	0.0987922	0.993527	Vacuolar protein sorting 55 (VPS55) family protein	-	1	-	-	-	1
AT1G08220.1	-0.625315	0.00523059	-0.782995	-0.012151	0.0212899	0.993046	0.0353456	0.993527		-	-	-	1	-	1
AT2G17340.1	0.129911	0.156023	0.461983	0.00746966	0.331875	0.310841	0.0313303	0.993527	Uncharacterised conserved protein (UCP030210)	-	-	-	1	-	1
AT3G49330.2	2.09359	-0.797905	1.69524	0.0252417	2.44777e-15	0.0137364	0.00957974	0.993527		-	-	-	1	-	1
AT1G54217.2	-0.457488	-0.251265	5.58851	0.030397	0.44498	0.766983	0.000739045	0.993527	Ribosomal protein L18ae family	-	-	-	1	-	1
AT4G29610.1	-0.911624	0.433009	0.0582374	-0.0436483	0.0134058	0.340861	0.982006	0.993516	Cytidine/deoxycytidylate deaminase family protein	-	1	-	-	-	1
AT1G74440.1	-1.56738	-2.20247	0.833805	-0.038557	0.00182734	7.68444e-06	0.55933	0.993126	Protein of unknown function (DUF962)	1	-	-	-	-	1
AT1G78790.1	1.05082	0.229361	0.731738	-0.017609	0.00327197	0.691222	0.150877	0.993118		-	1	-	-	-	1
AT3G22670.1	7.76009	0.621068	-0.298387	-0.0447895	0.00567691	0.903148	0.897459	0.99291	Pentatricopeptide repeat (PPR) superfamily protein	-	1	-	-	-	1
AT5G03840.1	-2.90655	-2.47975	0.274454	-0.157005	0.00244592	0.0102393	0.976185	0.992833	PEBP (phosphatidylethanolamine-binding protein) family protein	-	-	-	-	1	1
AT4G34160.1	-1.94552	-0.48318	-0.208676	-0.00930245	6.18841e-11	0.21561	0.515299	0.99227	CYCLIN D3;1	-	-	-	-	1	1
AT1G72230.1	1.30179	0.546796	0.680685	-0.0206797	1.26603e-17	0.00121313	0.240966	0.991726	Cupredoxin superfamily protein	-	-	-	-	1	1
AT1G50910.1	-0.492833	-0.109905	-0.745946	0.0178241	0.0251358	0.753276	0.117475	0.991616		-	-	1	-	-	1
AT4G04790.1	-1.37179	-0.442343	-1.11508	0.0173622	6.82075e-06	0.224825	0.00605369	0.991588	Tetratricopeptide repeat (TPR)-like superfamily protein	-	-	1	-	-	1
AT3G05890.1	1.99876	0.502396	2.37496	0.0246201	1.29748e-27	0.0229894	2.36853e-06	0.991588	Low temperature and salt responsive protein family	-	-	-	-	1	1
AT1G05140.1	0.517174	-0.081502	-0.0449333	0.00720553	0.0328356	0.857969	0.894446	0.991549	Peptidase M50 family protein	1	-	-	-	-	1
AT4G23810.1	-1.7981	-2.48534	0.688143	0.065749	0.0765762	0.0180239	0.802027	0.991549	WRKY family transcription factor	-	-	1	-	-	1
AT2G02180.1	0.581488	-0.0212498	0.245339	0.0124361	9.35749e-09	0.927453	0.540238	0.991549	tobamovirus multiplication protein 3	-	1	-	-	-	1
AT1G01630.1	0.345516	0.108596	0.236641	0.0115608	0.00808719	0.586178	0.527468	0.991549	Sec14p-like phosphatidylinositol transfer family protein	-	1	-	-	-	1
AT1G27050.1	-0.564593	0.176653	-0.796894	-0.0166322	0.00927652	0.563802	0.0488316	0.991549		-	1	-	-	-	1
AT5G15980.1	-1.0195	-0.0581157	-0.827957	-0.00781035	1.42892e-09	0.86791	1.66357e-07	0.991549	Pentatricopeptide repeat (PPR) superfamily protein	1	-	-	-	-	1
AT1G68825.1	-0.352886	-0.754869	-0.791916	0.128516	0.368159	0.0283679	NA	0.990822	ROTUNDIFOLIA like 15	-	1	-	-	-	1
AT1G65480.2	0.12636	7.23375	2.93044	-0.187147	0.98449	0.0208145	0.676389	0.990822		-	-	-	-	1	1
AT5G02130.1	-0.478834	-0.0477763	-0.206581	-0.011815	0.0130207	0.896017	0.580168	0.990478	Tetratricopeptide repeat (TPR)-like superfamily protein	-	-	-	1	-	1
AT1G66920.2	-5.79642	-0.568699	0.260959	0.077575	0.0329157	0.905808	0.934804	0.990257	Protein kinase superfamily protein	-	1	-	-	-	1
AT4G18240.1	0.620246	0.668769	0.0996451	0.0215415	9.22552e-08	3.48505e-09	0.914922	0.990257	starch synthase 4	-	1	-	-	-	1
AT1G26300.1	0.293158	-0.160194	0.165358	0.0146724	0.0195719	0.316857	0.743327	0.990257	BSD domain-containing protein	-	-	1	-	-	1
AT2G29460.1	4.05855	3.00871	1.34164	0.109423	0.00037193	0.0181784	0.72589	0.990257	glutathione S-transferase tau 4	-	-	-	1	-	1
AT3G60440.1	-0.598082	-0.0260356	-0.243177	-0.0161959	0.00368892	0.95439	0.64931	0.990257	Phosphoglycerate mutase family protein	-	-	1	-	-	1
AT1G80260.1	-0.472157	-0.113763	-0.195188	-0.00975612	4.99387e-06	0.435523	0.449159	0.990257	Spc97 / Spc98 family of spindle pole body (SBP) component	-	-	1	-	-	1
AT5G54280.2	0.340885	0.0931972	0.269455	-0.0111617	0.023931	0.703934	0.370413	0.990257	myosin 2	-	-	1	-	-	1
AT4G38360.2	0.422802	0.130099	0.246909	0.0108682	3.66628e-05	0.361462	0.354388	0.990257	Protein of unknown function (DUF300)	-	-	-	1	-	1
AT5G10920.1	-0.409016	0.00440888	-0.417836	-0.0160813	0.000876612	0.988325	0.306282	0.990257	L-Aspartase-like family protein	-	-	-	-	1	1
AT2G28200.1	0.437136	0.279921	-0.605658	-0.0205093	0.0201567	0.22133	0.192792	0.990257	C2H2-type zinc finger family protein	-	1	-	-	-	1
AT1G76290.1	10.9967	4.14403	6.97592	0.156414	2.28742e-17	0.0138435	0.0117403	0.990257	AMP-dependent synthetase and ligase family protein	-	-	1	-	-	1
AT1G15430.1	1.20982	0.595205	0.35184	-0.0256889	7.33141e-11	0.00464336	0.624477	0.989813	Protein of unknown function (DUF1644)	-	1	-	-	-	1
AT3G06620.1	0.637281	0.124445	0.226951	-0.0140579	5.93811e-10	0.419935	0.537612	0.989786	PAS domain-containing protein tyrosine kinase family protein	-	-	1	-	-	1
AT3G18820.1	0.480533	0.178803	0.301061	0.00784061	1.32297e-07	0.114546	0.0408133	0.989281	RAB GTPase homolog G3F	-	-	1	-	-	1
AT5G59290.2	0.919797	0.356222	0.48466	0.0106563	4.25468e-34	1.31674e-05	0.0102353	0.989132	UDP-glucuronic acid decarboxylase 3	-	1	-	-	-	1
AT2G34170.1	-0.402416	-0.24792	-0.0992732	0.0175205	0.0187706	0.234277	0.870103	0.989082	Protein of unknown function (DUF688)	-	-	-	1	-	1
AT3G26650.1	-2.62255	0.657775	0.120356	-0.0209174	2.97872e-05	0.475287	0.867211	0.989082	glyceraldehyde 3-phosphate dehydrogenase A subunit	-	-	1	-	-	1
AT1G27950.1	0.629635	1.22561	0.774176	-0.0165177	0.0121754	3.53686e-07	0.00718364	0.989082	glycosylphosphatidylinositol-anchored lipid protein transfer 1	-	-	-	-	1	1
AT5G25450.1	0.776569	0.304143	0.328253	0.0605268	0.0402762	0.60331	0.874255	0.988678	Cytochrome bd ubiquinol oxidase, 14kDa subunit	-	-	-	-	1	1
AT1G19130.1	-0.417091	-0.12626	-0.0736968	-0.0210157	0.0053881	0.572598	0.925149	0.988559		1	-	-	-	-	1
AT4G33945.1	0.549976	0.239878	0.424942	0.0109815	3.41778e-10	0.0151909	0.0304109	0.988559	ARM repeat superfamily protein	-	-	-	-	1	1
AT1G62820.1	0.482526	-0.0271062	0.71208	-0.0191423	0.00527828	0.943688	0.0398316	0.98851	Calcium-binding EF-hand family protein	-	-	-	-	1	1
AT2G44380.1	-0.901697	-1.24621	-0.0796677	0.128197	0.0149558	0.000929582	0.986569	0.988375	Cysteine/Histidine-rich C1 domain family protein	-	1	-	-	-	1
AT3G61610.1	0.817259	0.811364	0.177325	-0.0136533	6.22498e-05	7.97574e-05	0.608586	0.988069	Galactose mutarotase-like superfamily protein	1	-	-	-	-	1
AT4G22290.1	-0.81155	-0.399429	-0.0045212	0.0118948	6.41902e-07	0.0254276	0.992107	0.98803	Ubiquitin-specific protease family C19-related protein	-	-	1	-	-	1
AT5G55300.2	0.334401	-0.127327	-0.0392003	0.0089433	0.00521946	0.461126	0.898901	0.98803	DNA topoisomerase I alpha	-	-	1	-	-	1
AT2G30820.1	-2.24432	-1.39491	-0.323245	0.0409129	0.00683985	0.134595	0.789274	0.987489		-	1	-	-	-	1
AT5G24810.2	1.88303	0.252702	0.434746	-0.0263984	6.18196e-60	0.0953049	0.45876	0.987489	ABC1 family protein	-	1	-	-	-	1
AT2G40890.1	1.5445	0.522776	0.434341	0.0232035	3.92311e-17	0.0155782	0.368998	0.987489	cytochrome P450, family 98, subfamily A, polypeptide 3	-	-	-	1	-	1
AT4G32300.1	0.526639	0.908085	0.17528	0.0125933	0.000279266	2.01478e-11	0.540475	0.987078	S-domain-2 5	1	-	-	-	-	1
AT1G34320.1	-0.574941	-0.582015	-0.231981	-0.0148049	4.56022e-05	5.7712e-05	0.472957	0.986883	Protein of unknown function (DUF668)	-	-	1	-	-	1
AT5G50450.1	1.42953	1.13653	-0.323351	0.0427928	1.55995e-07	6.03824e-05	0.785203	0.986859	HCP-like superfamily protein with MYND-type zinc finger	-	-	1	-	-	1
AT3G53270.1	0.363311	0.549873	-0.175237	-0.0208615	0.012236	2.78477e-05	0.759761	0.986859	Small nuclear RNA activating complex (SNAPc), subunit SNAP43 protein	-	-	-	1	-	1
AT1G34130.1	-0.569983	0.0329141	-0.16054	-0.0137933	7.02754e-06	0.902754	0.62762	0.986859	staurosporin and temperature sensitive 3-like b	-	-	-	-	1	1
AT5G39090.1	1.93315	-0.539967	1.01689	0.0605275	9.95631e-08	0.305667	0.418851	0.986859	HXXXD-type acyl-transferase family protein	-	-	1	-	-	1
AT2G16230.1	-2.20264	-1.23079	-0.664832	0.327524	2.70451e-26	5.55915e-09	NA	0.986835	O-Glycosyl hydrolases family 17 protein	-	1	-	-	-	1
AT5G01550.1	1.09209	0.0868255	-0.0223509	0.160702	0.0410673	0.940382	0.997472	0.986835	lectin receptor kinase a4.1	1	-	-	-	-	1
AT3G57380.1	0.871398	-0.0918319	0.553788	0.0747929	0.0018213	0.868297	0.792908	0.986835	Glycosyltransferase family 61 protein	-	-	1	-	-	1
AT5G05240.1	-0.481438	0.105736	-0.264799	-0.0226991	0.043735	0.79121	0.616512	0.986835	Uncharacterised conserved protein (UCP030365)	1	-	-	-	-	1
AT5G49020.1	-0.589365	0.0559786	-0.326988	0.0126129	2.95617e-05	0.835031	0.137366	0.986835	protein arginine methyltransferase 4A	-	1	-	-	-	1
AT4G00430.1	1.75843	0.777274	0.520342	0.0133792	4.69853e-29	4.51264e-06	0.0109363	0.986835	plasma membrane intrinsic protein 1;4	1	-	-	-	-	1
AT3G23100.1	-0.807697	-0.308378	-0.415969	-0.0219746	9.84507e-08	0.0866931	0.324408	0.986589	homolog of human DNA ligase iv-binding protein XRCC4	-	1	-	-	-	1
AT5G42350.1	0.687444	0.118776	0.423948	0.0153796	1.42244e-08	0.546586	0.0972477	0.986347	Galactose oxidase/kelch repeat superfamily protein	-	-	-	-	1	1
AT3G14860.2	-0.276918	0.338149	-0.297755	0.0157388	0.0180088	0.00340035	0.310343	0.98623	NHL domain-containing protein	1	-	-	-	-	1
AT1G15100.1	-1.24854	-0.854291	-0.326785	0.0304029	8.41795e-12	9.96507e-06	0.639013	0.986021	RING-H2 finger A2A	-	-	1	-	-	1
AT5G50300.2	-1.31941	-0.644118	-0.727485	-0.0525151	1.98054e-11	0.00286244	0.509341	0.986021		-	-	-	-	1	1
AT4G28250.1	-4.10214	-2.07528	-0.889375	-0.0230902	3.765e-14	0.00041455	0.00670911	0.986021	expansin B3	-	-	1	-	-	1
AT3G50290.1	0.811497	1.4157	0.28184	0.195739	0.0505437	0.000327547	NA	0.985934	HXXXD-type acyl-transferase family protein	1	-	-	-	-	1
AT1G48650.2	-0.201524	-0.0282854	-0.500147	-0.016341	0.109048	0.906337	0.0375021	0.985813	DEA(D/H)-box RNA helicase family protein	-	-	1	-	-	1
AT2G43490.1	0.528078	0.32406	0.0818393	-0.0256055	2.56981e-05	0.0222923	0.910354	0.985799	Ypt/Rab-GAP domain of gyp1p superfamily protein	-	-	-	-	1	1
AT1G01960.1	-0.308257	-0.0227702	-0.121126	0.0106886	0.00749401	0.926859	0.588634	0.985799	SEC7-like guanine nucleotide exchange family protein	-	-	1	-	-	1
AT1G12750.1	0.287295	-0.54658	0.167966	0.0149941	0.280117	0.0370987	0.577683	0.985799	RHOMBOID-like protein 6	-	-	1	-	-	1
AT1G25570.1	-0.734484	-0.332802	-0.165711	0.0106403	2.92072e-07	0.0459682	0.394821	0.985799	Di-glucose binding protein with Leucine-rich repeat domain	-	1	-	-	-	1
AT5G01110.2	-1.05109	0.163035	-0.476679	0.0411611	0.0021149	0.771907	0.563254	0.985545		-	-	-	-	1	1
AT3G02350.1	-0.533162	-0.00731286	-0.0421816	0.0146845	4.97011e-06	0.9807	0.919435	0.985422	galacturonosyltransferase 9	1	-	-	-	-	1
AT3G50280.1	-0.913211	-1.04082	0.334491	-0.0732618	0.00841877	0.00252886	0.851796	0.985361	HXXXD-type acyl-transferase family protein	-	-	1	-	-	1
AT2G46080.1	0.858512	0.452166	0.260893	0.024592	1.27703e-05	0.0481719	0.592036	0.985099		1	-	-	-	-	1
AT4G20110.2	0.333425	-0.701805	0.586026	0.134483	0.148331	0.00150809	0.862406	0.984644	VACUOLAR SORTING RECEPTOR 7	-	-	1	-	-	1
AT4G18905.2	-0.85593	0.0491956	-1.09033	-0.0166112	5.11415e-11	0.849468	7.86196e-09	0.984537	Transducin/WD40 repeat-like superfamily protein	-	-	-	-	1	1
AT5G17160.1	-1.0583	0.453769	-0.20644	-0.024751	8.72672e-09	0.0335254	0.685999	0.984407		1	-	-	-	-	1
AT5G48930.1	0.89097	0.437244	-0.0680037	-0.03538	2.09282e-09	0.00997154	0.946481	0.984161	hydroxycinnamoyl-CoA shikimate/quinate hydroxycinnamoyl transferase	-	-	-	1	-	1
AT2G23985.13	1.25594	0.555964	0.0910973	0.0342131	0.000643307	0.212483	0.92027	0.984161		-	1	-	-	-	1
AT1G34420.1	-0.705181	-1.11634	0.371977	0.109771	7.48619e-05	1.66366e-10	0.898442	0.984161	leucine-rich repeat transmembrane protein kinase family protein	-	1	-	-	-	1
AT3G47580.1	2.05232	-0.0834971	0.570804	0.0681897	0.00218735	0.955478	0.672238	0.984161	Leucine-rich repeat protein kinase family protein	-	1	-	-	-	1
AT5G58450.1	-0.254573	-0.109255	-0.180247	-0.0116282	0.005546	0.372957	0.34037	0.984161	Tetratricopeptide repeat (TPR)-like superfamily protein	-	-	-	1	-	1
AT5G42360.1	0.493791	0.192236	0.252111	0.0163161	0.000226193	0.282183	0.328853	0.984161	Galactose oxidase/kelch repeat superfamily protein	-	-	-	1	-	1
AT2G38250.1	2.99654	1.39909	1.70232	0.0839034	2.21021e-14	0.00155322	0.168001	0.984161	Homeodomain-like superfamily protein	1	-	-	-	-	1
AT1G14400.1	0.345595	-0.0893169	0.401993	-0.0164492	0.0184476	0.713797	0.0776145	0.984161	ubiquitin carrier protein 1	-	-	-	-	1	1
AT3G29200.1	0.939221	-0.0279096	0.249996	0.0145652	2.32683e-05	0.957032	0.249867	0.984147	chorismate mutase 1	1	-	-	-	-	1
AT4G23010.3	-0.987444	-0.853349	0.104652	-0.0643012	3.7296e-05	0.000758966	0.953145	0.983585	UDP-galactose transporter 2	-	1	-	-	-	1
AT1G19900.1	1.24227	-0.113466	1.9393	0.149184	3.14206e-07	0.809733	0.418777	0.983565	glyoxal oxidase-related protein	-	-	1	-	-	1
AT2G20020.1	-0.725117	0.0249736	-0.576159	-0.028274	0.000438082	0.956124	0.13039	0.983565	RNA-binding CRS1 / YhbY (CRM) domain-containing protein	-	-	-	-	1	1
AT4G04920.1	-0.416122	-0.152052	-0.40041	-0.0296477	4.03424e-05	0.25079	0.387384	0.983447	sensitive to freezing 6	-	-	1	-	-	1
AT4G16500.1	0.427726	0.143057	0.464901	0.0207763	0.0150745	0.592155	0.0848649	0.983447	Cystatin/monellin superfamily protein	-	1	-	-	-	1
AT1G67120.2	-0.64989	-0.226472	-1.07819	0.028915	1.32745e-05	0.255918	0.000776257	0.983237		-	-	1	-	-	1
AT2G35370.1	-3.99798	0.927335	0.237508	-0.0314248	0.00810507	0.679274	0.685999	0.983055	glycine decarboxylase complex H	-	-	-	1	-	1
AT5G59570.1	2.17751	1.04142	1.71731	0.0775903	0.000407418	0.184931	0.0757222	0.983055	Homeodomain-like superfamily protein	-	1	-	-	-	1
AT5G51340.1	-0.520367	-0.202644	-0.147109	-0.014871	0.00029817	0.283104	0.557467	0.982919	Tetratricopeptide repeat (TPR)-like superfamily protein	1	-	-	-	-	1
AT3G06190.1	0.529286	0.0263099	-0.0517219	-0.0120959	3.68945e-09	0.89114	0.843874	0.982646	BTB-POZ and MATH domain 2	-	-	1	-	-	1
AT2G45630.2	1.04379	0.468292	0.322743	-0.0170306	8.94762e-06	0.0963451	0.133305	0.982646	D-isomer specific 2-hydroxyacid dehydrogenase family protein	-	-	1	-	-	1
AT4G36160.2	1.45773	0.0216354	0.0251342	0.0462478	0.00152314	0.985262	0.982902	0.982379		1	-	-	-	-	1
AT3G05980.1	-0.270015	-0.846748	0.635312	-0.0816374	0.442604	0.00750533	0.663872	0.982379		-	-	1	-	-	1
AT1G67550.1	-0.771252	-0.383825	-0.358675	0.0224139	9.54327e-06	0.0606078	0.246572	0.982379	urease	-	-	1	-	-	1
AT5G58300.1	0.711494	0.036034	-0.0640944	0.02031	2.28878e-09	0.888232	0.891009	0.982297	Leucine-rich repeat protein kinase family protein	-	1	-	-	-	1
AT3G05520.2	0.294706	0.199803	0.20682	0.0214261	0.0246095	0.180897	0.55306	0.981781	Subunits of heterodimeric actin filament capping protein Capz superfamily	-	1	-	-	-	1
AT2G32020.1	0.294896	-1.71584	0.252228	-0.104368	0.626193	0.000581256	0.914592	0.98144	Acyl-CoA N-acyltransferases (NAT) superfamily protein	-	1	-	-	-	1
AT2G21350.1	-1.36026	-0.289574	-0.556271	0.0633687	0.00777499	0.709102	0.606705	0.98144	RNA-binding CRS1 / YhbY (CRM) domain protein	-	-	1	-	-	1
AT1G64065.1	1.57893	0.406439	0.600327	-0.0682966	0.0265062	0.728319	0.597685	0.98144	Late embryogenesis abundant (LEA) hydroxyproline-rich glycoprotein family	-	1	-	-	-	1
AT1G53400.1	0.533475	-0.427535	0.416683	-0.0226006	0.000102414	0.00398626	0.135113	0.98144	Ubiquitin domain-containing protein	-	1	-	-	-	1
AT3G56940.1	-1.8193	0.100283	0.0654707	-0.0243097	1.0124e-06	0.898198	0.905799	0.981117	dicarboxylate diiron protein, putative (Crd1)	-	1	-	-	-	1
AT2G26200.1	-0.133777	0.235526	0.000498858	0.0345766	0.271263	0.0355987	0.999849	0.98096	S-adenosyl-L-methionine-dependent methyltransferases superfamily protein	-	-	1	-	-	1
AT2G13560.1	-0.338487	-0.0790818	0.0052771	0.0162861	0.00183036	0.652772	0.988721	0.98096	NAD-dependent malic enzyme 1	-	-	-	-	1	1
AT3G58000.1	-2.47627	-1.6302	-0.359607	0.0923109	0.000990686	0.0308196	0.857565	0.98096	VQ motif-containing protein	1	-	-	-	-	1
AT4G34340.1	0.555726	0.00855413	-0.149964	0.0364173	0.00342145	0.984594	0.836908	0.98096	TBP-associated factor 8	1	-	-	-	-	1
AT1G48760.1	0.255974	0.0164473	0.164552	0.0141354	0.0325608	0.949732	0.410565	0.98096	delta-adaptin	-	-	-	1	-	1
AT4G27880.1	0.371301	-0.120683	0.282441	-0.023729	0.00435386	0.536117	0.390361	0.98096	Protein with RING/U-box and TRAF-like domains	-	-	1	-	-	1
AT1G16780.1	-1.09638	-0.096291	-0.340522	-0.0242776	4.4029e-05	0.850292	0.284539	0.98096	Inorganic H pyrophosphatase family protein	-	1	-	-	-	1
AT1G74460.1	1.91183	-0.49188	1.42091	-0.0594689	1.10779e-09	0.257974	0.0264722	0.98096	GDSL-like Lipase/Acylhydrolase superfamily protein	1	-	-	-	-	1
AT2G28890.1	-1.05889	-0.52397	0.118084	-0.0670267	3.62951e-13	0.00102014	0.939223	0.980848	poltergeist like 4	1	-	-	-	-	1
AT1G16930.1	-0.634771	-0.735485	0.00400419	-0.0454885	0.0144597	0.00535981	0.997662	0.980626	F-box/RNI-like/FBD-like domains-containing protein	-	-	-	-	1	1
AT3G46620.1	0.649738	-0.314032	0.153681	0.0562382	0.00045667	0.181435	0.898759	0.980626	zinc finger (C3HC4-type RING finger) family protein	-	-	-	1	-	1
AT5G46510.1	-0.704799	-0.0437172	-0.00474142	-0.0351618	0.0118664	0.943213	0.995875	0.980567	Disease resistance protein (TIR-NBS-LRR class) family	-	-	1	-	-	1
AT2G41705.1	0.872426	0.105428	0.0431506	0.0311343	1.51626e-05	0.777133	0.953105	0.980567	camphor resistance CrcB family protein	-	1	-	-	-	1
AT4G26760.1	-0.371236	0.065091	-0.157059	0.022315	0.00125361	0.743101	0.666225	0.980567	microtubule-associated protein 65-2	-	1	-	-	-	1
AT3G07980.1	-0.171842	0.409521	-0.491398	-0.0317157	0.425976	0.0384483	0.200436	0.980567	mitogen-activated protein kinase kinase kinase 6	-	-	-	1	-	1
AT5G05965.1	7.55726	1.05665	2.27654	0.363796	8.19622e-07	0.493831	0.69285	0.980143		-	1	-	-	-	1
AT5G59520.1	-0.70662	-1.28053	-0.399301	-0.0951686	0.0363117	0.000101127	0.824771	0.980063	ZRT/IRT-like protein 2	-	-	1	-	-	1
AT3G07180.1	-0.473198	-0.0403632	-0.172251	0.0154269	1.80422e-05	0.850468	0.406944	0.980036	GPI transamidase component PIG-S-related	-	-	1	-	-	1
AT5G46630.2	0.439753	-0.0155746	0.0500026	0.014841	1.25135e-10	0.919802	0.861949	0.979827	Clathrin adaptor complexes medium subunit family protein	-	1	-	-	-	1
AT3G07390.1	1.41673	0.403302	0.418921	0.0744707	1.29974e-05	0.389625	0.740063	0.979596	auxin-responsive family protein	-	1	-	-	-	1
AT5G16780.1	0.393645	0.0432797	-0.235046	0.0190116	0.00399169	0.87365	0.324145	0.979501	SART-1 family	-	1	-	-	-	1
AT2G04038.1	2.54197	1.79788	-0.0792487	-0.293142	0.00456675	0.0841223	0.989864	0.979461	basic leucine-zipper 48	-	1	-	-	-	1
AT5G38510.1	0.649436	0.782254	-0.173849	0.0287777	0.0490551	0.0162983	0.707931	0.979461	Rhomboid-related intramembrane serine protease family protein	1	-	-	-	-	1
AT1G29120.5	0.660558	-0.0523377	0.187486	-0.0241291	0.000371576	0.892575	0.598006	0.979461	Hydrolase-like protein family	-	-	1	-	-	1
AT1G13610.1	-2.5924	-3.75909	-3.20035	-0.360852	0.0167632	0.00607331	0.570575	0.979361	alpha/beta-Hydrolases superfamily protein	-	-	-	1	-	1
AT2G28940.2	-1.25088	-1.06777	-0.154964	0.0662827	4.85663e-08	2.77303e-06	0.909732	0.979345	Protein kinase superfamily protein	-	1	-	-	-	1
AT4G08470.1	-0.464464	-0.374354	0.0893023	0.0898973	0.00932562	0.0507315	0.96573	0.979336	MAPK/ERK kinase kinase 3	-	-	1	-	-	1
AT4G35310.1	-0.180047	-0.127356	-0.0320653	0.0212845	0.0267428	0.195301	0.943993	0.979164	calmodulin-domain protein kinase 5	1	-	-	-	-	1
AT5G67310.1	3.63166	2.20837	1.9307	-0.399587	0.00838627	0.0691859	0.777984	0.977158	cytochrome P450, family 81, subfamily G, polypeptide 1	-	-	-	-	1	1
AT1G32127.1	0.789974	0.338603	0.519216	0.0627785	8.20263e-11	0.01616	0.5307	0.977158		-	1	-	-	-	1
AT2G41560.1	-1.0868	-0.0829203	-0.391804	0.0378807	1.18053e-05	0.871908	0.400467	0.977071	autoinhibited Ca(2+)-ATPase, isoform 4	-	-	1	-	-	1
AT5G56460.1	-0.722724	-0.277399	0.11228	-0.0429566	0.0040248	0.416772	0.893284	0.976979	Protein kinase superfamily protein	-	-	1	-	-	1
AT5G24280.1	-2.15542	-0.11326	0.122507	0.0330472	2.67824e-05	0.91395	0.831205	0.976979	gamma-irradiation and mitomycin c induced 1	1	-	-	-	-	1
AT1G64440.1	0.642298	0.200175	0.393055	-0.0275778	2.53804e-06	0.290484	0.185594	0.976979	NAD(P)-binding Rossmann-fold superfamily protein	-	1	-	-	-	1
AT1G11130.1	-0.910046	1.53886	-0.591879	0.0396359	0.00250102	9.44399e-08	0.159005	0.976979	Leucine-rich repeat protein kinase family protein	-	-	-	-	1	1
AT3G57670.1	-1.20942	-0.782758	-0.407197	-0.0564222	0.00577224	0.118195	0.600761	0.976746	C2H2-type zinc finger family protein	-	-	-	-	1	1
AT1G76510.3	0.347997	0.153274	0.154587	0.0190157	0.00413714	0.335778	0.527798	0.976349	ARID/BRIGHT DNA-binding domain-containing protein	-	-	1	-	-	1
AT1G30330.2	-0.432649	0.0607933	-0.540425	-0.0242894	0.00115946	0.802612	0.0145422	0.976349	auxin response factor 6	-	-	1	-	-	1
AT5G61480.1	-0.940643	-0.173308	-0.121875	-0.027727	2.91811e-05	0.636738	0.786248	0.976203	Leucine-rich repeat protein kinase family protein	-	-	1	-	-	1
AT1G66350.1	-0.129324	-0.830604	0.446746	0.0423768	0.615413	7.10439e-05	0.360776	0.976203	RGA-like 1	-	-	1	-	-	1
AT1G56690.1	-0.844059	0.186724	-0.923438	-0.0631152	0.00199318	0.658435	0.150154	0.976203	Pentatricopeptide repeat (PPR) superfamily protein	1	-	-	-	-	1
AT3G19900.1	2.24088	1.17361	0.245935	0.0229902	8.60233e-60	1.29868e-18	0.357014	0.976197		-	-	-	1	-	1
AT4G35080.3	0.409966	0.0864432	-0.0791376	-0.0202754	1.04034e-05	0.556238	0.811792	0.976178	high-affinity nickel-transport family protein	-	1	-	-	-	1
AT1G33410.2	-0.654344	-0.123474	-0.612345	-0.0315422	2.33408e-07	0.529915	0.0377638	0.976178	SUPPRESSOR OF AUXIN RESISTANCE1	-	-	1	-	-	1
AT2G23470.1	-0.951468	0.196962	-0.900922	0.0379729	0.0747356	0.830553	0.0112987	0.97608	Protein of unknown function, DUF647	-	-	-	1	-	1
AT5G19855.1	2.13051	0.541092	0.467754	0.0174435	3.64149e-13	0.16704	0.00158085	0.97608	Chaperonin-like RbcX protein	-	-	-	1	-	1
AT1G11360.1	-0.437359	-0.136419	-0.0108974	0.0303326	0.000464934	0.434608	0.985214	0.975663	Adenine nucleotide alpha hydrolases-like superfamily protein	1	-	-	-	-	1
AT3G10080.2	0.743677	-0.529152	0.239029	-0.0386522	0.000236581	0.0266359	0.64989	0.975442		-	-	-	-	1	1
AT4G12780.1	0.257078	-0.0503806	-0.138112	-0.0216068	0.0118437	0.779488	0.636157	0.975314	Chaperone DnaJ-domain superfamily protein	-	-	1	-	-	1
AT3G07780.2	0.76428	0.165108	0.256279	-0.0308506	5.61863e-05	0.58773	0.498332	0.975314		-	-	1	-	-	1
AT1G09300.1	-0.297324	-0.0400251	-0.606876	-0.0321158	0.0653079	0.890743	0.0390931	0.975122	Metallopeptidase M24 family protein	-	-	-	1	-	1
AT2G21050.1	-1.09993	-0.156346	-0.0891462	0.0302308	0.00010827	0.757534	0.859066	0.974575	like AUXIN RESISTANT 2	-	-	-	-	1	1
AT5G61230.1	0.477791	0.2577	0.11786	0.020018	1.34622e-06	0.0221422	0.661569	0.974575	Ankyrin repeat family protein	1	-	-	-	-	1
AT5G06839.3	1.09166	-0.260131	0.779878	0.117317	5.73939e-12	0.238121	0.574859	0.974575	bZIP transcription factor family protein	-	-	1	-	-	1
AT4G13680.1	-1.50089	-1.09154	1.64715	0.199797	0.0493439	0.20837	0.478266	0.974575	Protein of unknown function (DUF295)	-	-	1	-	-	1
AT5G66930.3	0.625142	0.264081	0.347415	0.0354801	2.0997e-07	0.0582488	0.377465	0.974575		-	-	-	1	-	1
AT3G01650.1	1.53889	0.842651	0.294678	0.0293047	3.75614e-12	0.000528901	0.351048	0.974575	RING domain ligase1	-	1	-	-	-	1
AT3G17740.1	0.228132	0.190523	-0.310496	-0.0226717	0.0383628	0.120321	0.160536	0.974575		-	-	-	1	-	1
AT1G04555.1	0.624527	0.410589	0.892548	0.058259	0.00371186	0.0724077	0.11503	0.974575		-	-	-	1	-	1
AT5G39710.1	-0.596481	-0.230358	-0.839949	-0.0307242	0.0259236	0.545471	0.000823965	0.974575	Tetratricopeptide repeat (TPR)-like superfamily protein	-	-	-	-	1	1
AT1G05000.2	-1.23984	-1.138	0.0315365	-0.171348	0.000503784	0.00267745	0.992319	0.974526	Phosphotyrosine protein phosphatases superfamily protein	1	-	-	-	-	1
AT2G40140.1	0.124423	-0.451614	-0.111583	0.0723122	0.623874	0.0434221	0.932592	0.974418	zinc finger (CCCH-type) family protein	-	-	1	-	-	1
AT4G24270.2	-0.845403	0.0399715	-0.575049	-0.0253232	9.7283e-12	0.873221	0.00505693	0.973492	EMBRYO DEFECTIVE 140	-	-	-	-	1	1
AT5G03530.1	0.390842	-0.198576	0.165698	-0.0407898	0.0110821	0.31719	0.787895	0.973226	RAB GTPase homolog C2A	-	-	-	-	1	1
AT3G16840.2	-0.436096	0.062464	-0.696743	-0.02894	0.000802542	0.789585	0.00221362	0.973185		-	-	1	-	-	1
AT1G10180.1	-0.33549	0.140227	0.0583614	-0.0200371	0.0127437	0.449371	0.853084	0.973095		1	-	-	-	-	1
AT2G02070.1	-0.869418	-0.444905	-0.391756	0.0398845	2.99687e-07	0.0173644	0.345931	0.972864	indeterminate(ID)-domain 5	-	-	1	-	-	1
AT1G59710.2	-0.714924	-0.312685	0.0444132	0.0310138	1.89156e-07	0.0476434	0.935037	0.97269		-	-	-	1	-	1
AT4G10080.1	0.474675	-0.0521752	0.0936498	0.0287367	0.00467026	0.876148	0.828397	0.972461		-	1	-	-	-	1
AT1G16860.1	0.690917	0.244822	0.446564	0.0282011	1.03884e-10	0.0618016	0.0630435	0.972461	Ubiquitin-specific protease family C19-related protein	1	-	-	-	-	1
AT5G45130.2	0.346045	-0.0164858	0.38461	0.0403203	0.000102884	0.934191	0.346369	0.971959		-	-	1	-	-	1
AT5G42380.1	3.19324	0.666807	1.3673	-0.183999	4.56725e-05	0.591129	0.505649	0.971932	calmodulin like 37	-	1	-	-	-	1
AT3G61570.1	0.673891	0.133133	0.0703885	0.0284638	7.29959e-09	0.439301	0.872385	0.971754	GRIP-related ARF-binding domain-containing protein 1	-	1	-	-	-	1
AT5G62770.1	0.92723	0.472585	0.61162	0.0677821	0.000162038	0.113811	0.381204	0.971683	Protein of unknown function (DUF1645)	-	-	-	1	-	1
AT1G66880.1	1.58893	-0.281297	0.536244	0.167515	7.85056e-05	0.681894	0.827269	0.971579	Protein kinase superfamily protein	-	-	-	1	-	1
AT1G71015.1	-1.55804	-2.19355	1.58317	0.131388	1.89696e-06	1.50367e-09	0.187817	0.971579		-	-	-	-	1	1
AT2G37310.1	-0.845802	0.0784566	-0.772167	-0.0578915	0.00117251	0.87827	0.128257	0.971579	Pentatricopeptide repeat (PPR) superfamily protein	1	-	-	-	-	1
AT3G23900.1	0.523527	-0.050504	0.0511172	-0.0206229	3.82336e-08	0.777133	0.869114	0.971079	RNA recognition motif (RRM)-containing protein	-	-	-	-	1	1
AT3G07080.1	0.701609	0.432808	0.173925	0.0293356	1.03761e-05	0.0124069	0.615755	0.971079	EamA-like transporter family	-	-	-	1	-	1
AT3G11950.1	0.316346	-0.0921284	-0.270153	-0.0405698	0.0140351	0.652521	0.55498	0.971079	TRAF-like superfamily protein	-	-	-	-	1	1
AT3G19390.1	0.52084	0.209164	0.553092	-0.0677833	0.0183034	0.518635	0.404183	0.971079	Granulin repeat cysteine protease family protein	-	1	-	-	-	1
AT3G62300.2	-0.773031	-0.308561	-0.334827	0.0361363	6.79425e-07	0.101568	0.347832	0.970706	DOMAIN OF UNKNOWN FUNCTION 724 7	-	-	1	-	-	1
AT1G70440.1	1.85321	1.94029	3.88891	0.231881	0.0278983	0.0354349	0.052691	0.970654	similar to RCD one 3	1	-	-	-	-	1
AT5G59300.1	0.827082	0.0577127	0.486624	-0.033101	1.50385e-06	0.873093	0.0749679	0.970375	ubiquitin carrier protein 7	-	-	-	-	1	1
AT3G18020.1	-0.908535	0.0799727	-0.0914412	-0.0699345	0.0103833	0.905642	0.937728	0.970369	Pentatricopeptide repeat (PPR) superfamily protein	-	-	1	-	-	1
AT3G08780.1	0.321999	-0.112652	-0.1489	-0.0257838	0.0176083	0.579518	0.618288	0.970369		-	1	-	-	-	1
AT5G11090.1	1.01205	-0.114393	0.412438	0.0574968	1.67314e-05	0.796854	0.50469	0.970369	serine-rich protein-related	-	1	-	-	-	1
AT1G49000.1	-0.622345	-2.55294	0.394658	0.282449	0.450488	0.000335905	0.931981	0.970197		-	-	1	-	-	1
AT1G78000.1	-0.783311	0.675321	-0.238972	-0.168931	0.0152398	0.0649311	0.930675	0.970142	sulfate transporter 1;2	-	1	-	-	-	1
AT1G24340.1	0.0641938	-0.392612	0.250825	0.0299096	0.727195	0.00659459	0.395164	0.970142	FAD/NAD(P)-binding oxidoreductase family protein	-	1	-	-	-	1
AT3G27550.2	-0.685616	0.0457722	-1.11949	-0.0645967	0.00538867	0.930409	0.0238963	0.970058		-	-	1	-	-	1
AT5G60300.3	-0.560822	-0.136325	0.154644	-0.0360985	0.00289785	0.649974	0.731376	0.969827	Concanavalin A-like lectin protein kinase family protein	1	-	-	-	-	1
AT1G64000.1	3.17136	-0.117223	3.47141	-0.263111	3.54624e-15	0.895997	0.0996646	0.969819	WRKY DNA-binding protein 56	-	-	-	-	1	1
AT1G53190.1	0.944864	-0.0207055	0.237142	0.0290674	5.93728e-09	0.957886	0.402544	0.969806	RING/U-box superfamily protein	-	-	-	-	1	1
AT1G12430.2	-1.10684	-0.0195874	-0.644034	-0.0315493	1.51474e-09	0.962922	0.00510697	0.969375	armadillo repeat kinesin 3	-	-	1	-	-	1
AT1G58400.2	-0.529228	-0.748659	-0.103919	0.0607255	4.17103e-05	2.11688e-09	0.911609	0.969358		-	-	1	-	-	1
AT4G15560.1	-1.02787	-0.919557	-0.031109	0.0248492	1.81699e-11	3.93843e-09	0.938292	0.968952	Deoxyxylulose-5-phosphate synthase	-	1	-	-	-	1
AT4G02570.1	0.436821	0.135789	0.0146683	0.0214177	1.10211e-07	0.217838	0.968213	0.968842	cullin 1	1	-	-	-	-	1
AT3G21465.2	-1.079	-0.186577	-0.219038	-0.0462211	1.72331e-15	0.287347	0.688028	0.968836		-	1	-	-	-	1
AT5G16390.1	0.548527	0.0969917	0.221981	-0.0341209	0.000778649	0.735824	0.527468	0.96803	chloroplastic acetylcoenzyme A carboxylase 1	-	1	-	-	-	1
AT1G55700.1	-1.71742	-1.53733	-3.49904	-0.447215	0.000717541	0.00620736	NA	0.96786	Cysteine/Histidine-rich C1 domain family protein	-	-	1	-	-	1
AT2G19780.1	0.698398	0.710894	0.377587	-0.0598432	0.0304268	0.0306601	0.535851	0.96786	Leucine-rich repeat (LRR) family protein	-	-	-	-	1	1
AT2G27810.4	-0.610612	-0.0709567	-0.330126	-0.038272	4.8129e-05	0.791981	0.345761	0.96786		-	-	-	1	-	1
AT2G34020.2	-1.47205	-0.851683	-3.32646	0.172496	6.24102e-13	8.89727e-05	0.0168935	0.96786		-	-	-	-	1	1
AT4G25620.1	-0.749217	-0.295109	-0.246534	-0.0292201	0.011252	0.489202	0.355255	0.967854	hydroxyproline-rich glycoprotein family protein	-	1	-	-	-	1
AT1G56190.1	-0.984178	-0.290752	0.00929376	-0.0354009	1.02402e-19	0.020196	0.986277	0.967704	Phosphoglycerate kinase family protein	-	-	1	-	-	1
AT5G63620.1	0.389675	0.0231147	0.250825	-0.035595	0.0304874	0.952878	0.467612	0.967704	GroES-like zinc-binding alcohol dehydrogenase family protein	-	1	-	-	-	1
AT1G30000.2	0.289922	0.0571793	0.0841568	-0.0407784	0.0043226	0.741662	0.885244	0.96765		-	-	1	-	-	1
AT3G13570.1	-0.574481	-0.0925367	-0.574749	-0.0270078	1.42241e-05	0.674534	0.0015572	0.967467	SC35-like splicing factor 30A	-	-	1	-	-	1
AT4G30400.1	0.60228	0.138378	-0.361276	-0.0597269	0.0011327	0.644617	0.549634	0.966916	RING/U-box superfamily protein	-	-	-	-	1	1
AT4G12040.1	0.714686	-0.0929895	0.532744	0.040777	1.27375e-10	0.619652	0.0841531	0.966783	A20/AN1-like zinc finger family protein	-	-	-	1	-	1
AT3G22980.1	0.479064	0.222418	-0.0624389	0.0283125	3.71407e-05	0.117982	0.869289	0.966603	Ribosomal protein S5/Elongation factor G/III/V family protein	-	-	1	-	-	1
AT1G06680.1	-1.70148	0.300206	0.0652662	-0.0304729	0.000572502	0.725298	0.874508	0.966559	photosystem II subunit P-1	-	1	-	-	-	1
AT2G36810.1	0.33359	0.0768046	-0.119089	0.0321493	0.00367613	0.683455	0.755784	0.966559	ARM repeat superfamily protein	-	-	1	-	-	1
AT5G46050.1	-3.27194	-2.45268	0.554661	0.280466	2.42004e-08	4.40765e-05	0.886793	0.966272	peptide transporter 3	-	1	-	-	-	1
AT1G05300.1	-2.0561	-2.0285	-0.32833	-0.146143	5.54374e-18	5.5268e-17	0.864335	0.966272	zinc transporter 5 precursor	-	-	1	-	-	1
AT3G22425.2	-0.755178	-0.0313841	-0.0893324	0.038614	0.00134524	0.951003	0.861007	0.966272	imidazoleglycerol-phosphate dehydratase	-	1	-	-	-	1
AT1G13830.2	0.000932907	-0.75493	1.05293	0.272069	0.996472	3.89197e-05	0.738611	0.966272		-	-	1	-	-	1
AT4G20380.8	0.709881	-0.154508	0.289616	-0.0345328	3.04939e-11	0.310102	0.326517	0.966272	LSD1 zinc finger family protein	1	-	-	-	-	1
AT2G44090.1	0.236487	-0.101929	0.175229	0.0188256	0.0270496	0.503656	0.266208	0.966272	Ankyrin repeat family protein	-	-	-	-	1	1
AT4G36180.1	-0.887147	-0.0692937	-0.494192	0.0422623	2.45236e-09	0.8104	0.124653	0.966272	Leucine-rich receptor-like protein kinase family protein	-	-	1	-	-	1
AT1G25580.1	-0.290309	0.00582845	-0.00782814	-0.037888	0.0392974	0.985339	0.988759	0.966272	NAC (No Apical Meristem) domain transcriptional regulator superfamily protein	-	-	-	-	1	1
AT1G72210.1	0.488624	0.386775	0.0946477	-0.0949597	0.0463424	0.175352	0.947249	0.966272	basic helix-loop-helix (bHLH) DNA-binding superfamily protein	-	-	1	-	-	1
AT5G25620.2	-2.03219	-0.677965	-0.459014	0.0569575	7.83458e-13	0.0388971	0.361514	0.966271	Flavin-binding monooxygenase family protein	-	-	1	-	-	1
AT4G35920.1	-0.590151	-0.602733	0.0128144	-0.026595	6.46116e-06	5.88236e-06	0.975544	0.965781	PLAC8 family protein	1	-	-	-	-	1
AT3G19420.1	0.252905	-0.0908659	0.174672	-0.0226793	0.000268971	0.339361	0.377354	0.965781	PTEN 2	-	-	-	-	1	1
AT1G56660.1	1.83941	0.32834	0.852337	-0.0840056	4.57151e-10	0.474766	0.194169	0.965781		1	-	-	-	-	1
AT5G20120.1	0.758489	0.4743	0.446921	-0.0401956	2.56632e-05	0.0153208	0.152138	0.965781		-	-	-	1	-	1
AT1G76400.1	-0.412774	0.139515	-0.273298	-0.0220769	0.000246894	0.37269	0.0937118	0.965781	Ribophorin I	-	1	-	-	-	1
AT1G01120.1	2.85738	0.681111	1.45692	-0.0561839	1.71149e-34	0.014248	1.8083e-05	0.965781	3-ketoacyl-CoA synthase 1	-	-	1	-	-	1
AT4G21500.1	1.116	0.187168	-0.0371901	0.0821983	0.0267536	0.834144	0.976699	0.965583		-	-	-	-	1	1
AT5G65790.1	0.937336	0.734242	0.824476	-0.116772	3.04876e-05	0.00235711	0.430117	0.965569	myb domain protein 68	-	-	-	1	-	1
AT5G47780.1	-0.555172	0.130343	-0.176856	-0.0359727	3.45096e-07	0.410578	0.630931	0.965478	galacturonosyltransferase 4	-	1	-	-	-	1
AT5G44820.1	1.00896	1.21475	0.329227	0.258275	0.0364304	0.0158826	0.929531	0.965339	Nucleotide-diphospho-sugar transferase family protein	1	-	-	-	-	1
AT3G50700.1	-0.96571	-0.651694	-0.295216	0.0743197	4.20469e-05	0.00973182	0.714644	0.965045	indeterminate(ID)-domain 2	-	-	-	1	-	1
AT5G06120.1	0.493846	0.0910255	0.21219	-0.0263114	7.36731e-07	0.570129	0.331055	0.965032	ARM repeat superfamily protein	-	-	1	-	-	1
AT5G59050.1	1.59177	0.264814	0.806737	0.0622224	3.74022e-11	0.487566	0.0674491	0.965032		-	-	1	-	-	1
AT4G23740.1	-0.477424	0.0820345	-0.116016	0.0410126	0.0108158	0.807626	0.815688	0.964811	Leucine-rich repeat protein kinase family protein	-	-	-	1	-	1
AT4G22970.3	-0.42402	-0.0240193	-0.420371	0.0563297	0.0046365	0.941236	0.37333	0.964053		-	-	1	-	-	1
AT4G30940.1	0.848962	0.332332	-0.113062	0.0564771	0.00450356	0.425709	0.877665	0.96391	BTB/POZ domain with WD40/YVTN repeat-like protein	-	1	-	-	-	1
AT5G11740.1	1.65882	0.769315	0.126036	-0.0360033	2.92781e-24	1.35107e-05	0.750845	0.963782	arabinogalactan protein 15	-	1	-	-	-	1
AT5G07020.1	1.11245	0.782115	0.122759	0.03963	0.000432386	0.0289114	0.788017	0.963623	proline-rich family protein	1	-	-	-	-	1
AT4G31000.1	0.385521	1.0243	0.672849	0.0610376	0.058569	1.33518e-08	0.124746	0.963623	Calmodulin-binding protein	-	-	-	1	-	1
AT3G13275.1	1.49263	0.389036	0.814288	0.0744596	4.71658e-08	0.295889	0.116176	0.963443		-	-	-	1	-	1
AT4G22960.1	2.59738	-1.39057	1.92143	0.471941	0.000875281	0.14877	0.652771	0.963439	Protein of unknown function (DUF544)	1	-	-	-	-	1
AT3G50120.1	-1.37081	-1.28278	-0.992529	-0.196034	0.0244044	0.0535181	0.590516	0.963233	Plant protein of unknown function (DUF247)	-	-	-	1	-	1
AT1G05360.1	0.299137	-0.0365366	0.501725	0.0400061	0.0468404	0.901417	0.0650991	0.963233		-	1	-	-	-	1
AT4G10720.1	-0.46295	-2.73722	0.455814	-0.73767	0.666828	0.00286381	0.966882	0.963052	Ankyrin repeat family protein	-	-	1	-	-	1
AT3G07200.1	-0.553729	-0.0027086	-0.127755	-0.0585139	0.0398501	0.995637	0.857565	0.963052	RING/U-box superfamily protein	-	-	1	-	-	1
AT2G38700.1	0.467285	-0.0781022	0.208699	0.0235015	1.82737e-06	0.632409	0.23514	0.963052	mevalonate diphosphate decarboxylase 1	-	1	-	-	-	1
AT3G55700.1	-4.10648	-5.23722	0.126161	-0.317019	8.39161e-10	1.12842e-09	0.977312	0.962528	UDP-Glycosyltransferase superfamily protein	-	1	-	-	-	1
AT1G09270.1	0.318235	0.0300743	0.0511388	-0.0268298	4.41995e-05	0.845518	0.876193	0.962446	importin alpha isoform 4	-	1	-	-	-	1
AT4G15610.1	1.75886	0.77788	0.836141	-0.244337	1.83373e-08	0.0356207	0.746045	0.962368	Uncharacterised protein family (UPF0497)	1	-	-	-	-	1
AT5G09420.1	-1.00246	-0.269986	-1.35133	0.067389	2.63018e-07	0.299892	0.00064699	0.962211	translocon at the outer membrane of chloroplasts 64-V	-	-	-	1	-	1
AT5G61330.2	-0.821692	-0.311999	-0.561045	0.0383747	6.91496e-07	0.125302	0.019027	0.961565		-	-	-	-	1	1
AT2G45450.1	1.08882	-0.723768	-0.26288	-0.0499583	0.00921112	0.160398	0.556746	0.961412	protein binding	-	-	-	1	-	1
AT5G66070.2	1.98654	0.428788	0.883844	-0.0865141	3.68707e-12	0.290313	0.135385	0.961412	RING/U-box superfamily protein	-	1	-	-	-	1
AT2G30390.2	1.0911	0.837224	-0.0947099	-0.0380981	4.03376e-06	0.000947876	0.826818	0.961303	ferrochelatase 2	-	1	-	-	-	1
AT1G53840.1	0.385019	0.389715	-0.149314	0.0411539	0.041803	0.0629778	0.715114	0.960895	pectin methylesterase 1	-	-	1	-	-	1
AT3G01950.1	-1.13867	-1.00953	1.01784	-0.536643	1.94579e-10	2.84867e-08	0.87141	0.960371	Protein of unknown function (DUF 3339)	-	-	-	-	1	1
AT3G54020.1	0.210534	-0.121077	0.698437	-0.0491864	0.312325	0.686552	0.0184595	0.960135	Arabidopsis Inositol phosphorylceramide synthase 1	-	-	-	-	1	1
AT3G61010.1	-0.913266	-0.40289	-0.162565	0.0615471	0.000127961	0.179035	0.809135	0.959718	Ferritin/ribonucleotide reductase-like family protein	-	-	1	-	-	1
AT1G62422.1	-0.840215	-0.259059	-0.247454	0.0832443	0.0260731	0.65789	0.778856	0.959718		-	-	1	-	-	1
AT2G31300.2	-0.516228	-0.141706	-0.0167734	0.0439018	0.00474587	0.598763	0.977885	0.959559		-	-	-	-	1	1
AT2G30440.1	-0.324954	-0.506485	-0.041704	-0.060897	0.0908077	0.00907155	0.960843	0.959402	thylakoid processing peptide	-	-	1	-	-	1
AT2G02710.1	1.916	-0.15244	0.946129	-0.0545914	8.38603e-08	0.831049	0.00212478	0.959402	PAS/LOV protein B	1	-	-	-	-	1
AT1G66460.3	0.363561	-1.69608	-4.24201	-0.314776	0.678011	0.048755	0.11087	0.959352		1	-	-	-	-	1
AT3G54250.1	0.626843	0.395376	0.532409	0.0477833	7.17096e-08	0.00156226	0.083357	0.959212	GHMP kinase family protein	-	1	-	-	-	1
AT5G15700.2	-0.605926	0.256135	-0.972685	-0.0535096	6.93883e-05	0.159655	0.00119312	0.959212	DNA/RNA polymerases superfamily protein	-	-	-	1	-	1
AT3G57660.1	-0.734394	0.108151	-1.39687	-0.0543482	0.000123318	0.750787	8.42865e-07	0.959212	nuclear RNA polymerase A1	-	-	1	-	-	1
AT2G13800.1	-0.487619	-0.36203	0.0727497	-0.130507	0.0164876	0.111087	0.967991	0.95876	somatic embryogenesis receptor-like kinase 5	-	-	-	1	-	1
AT5G28530.1	0.537697	0.124104	-0.122566	-0.0499397	0.0184829	0.745213	0.816154	0.958068	FAR1-related sequence 10	1	-	-	-	-	1
AT5G14950.1	-0.381457	-0.0516794	-0.292804	-0.0291518	1.4027e-05	0.736898	0.119239	0.957771	golgi alpha-mannosidase II	1	-	-	-	-	1
AT5G10790.1	0.273461	0.408776	0.461561	0.0471012	0.0678319	0.00604312	0.129188	0.957734	ubiquitin-specific protease 22	-	-	-	1	-	1
AT5G61840.1	-0.202664	-0.215758	0.0216064	0.0249192	0.0392065	0.0401072	0.946033	0.956993	Exostosin family protein	-	1	-	-	-	1
AT5G41780.1	4.61644	-1.65951	3.18991	0.608687	0.00499113	0.40273	0.556956	0.956993	myosin heavy chain-related	-	1	-	-	-	1
AT4G15540.1	-0.85478	-0.430505	0.0336391	-0.0504741	0.000550156	0.135039	0.960461	0.956924	EamA-like transporter family	-	-	-	1	-	1
AT3G55410.1	0.247612	0.144353	0.0101797	0.0396944	0.0412206	0.370433	0.983826	0.956918	2-oxoglutarate dehydrogenase, E1 component	-	1	-	-	-	1
AT2G41060.1	0.371004	0.104296	0.142562	0.0375166	0.00464002	0.608076	0.675008	0.956918	RNA-binding (RRM/RBD/RNP motifs) family protein	-	-	1	-	-	1
AT1G29910.1	-3.81337	2.26201	0.111466	0.055569	0.0175214	0.272321	0.8533	0.956282	chlorophyll A/B binding protein 3	-	-	-	-	1	1
AT5G64150.1	-0.520341	-0.021571	-0.180912	0.0685282	0.00281214	0.953351	0.793935	0.955814	RNA methyltransferase family protein	-	-	-	-	1	1
AT3G27880.1	0.893781	0.652174	0.401296	-0.0646301	5.68156e-05	0.00699943	0.408686	0.955814	Protein of unknown function (DUF1645)	1	-	-	-	-	1
AT4G16008.1	-1.57574	-0.3832	-0.274898	0.0798056	0.000459431	0.552238	0.704327	0.955613		1	-	-	-	-	1
AT5G22090.1	-0.735379	0.00313953	0.210235	0.0550423	7.33951e-09	0.992471	0.664107	0.955596	Protein of unknown function (DUF3049)	1	-	-	-	-	1
AT1G80530.1	-1.07486	0.0924864	-0.513196	-0.045622	2.00785e-12	0.727938	0.0589559	0.955439	Major facilitator superfamily protein	-	1	-	-	-	1
AT4G25434.8	-1.70098	0.516871	-1.44411	0.183018	1.38094e-05	0.27278	0.324374	0.954777		-	-	-	-	1	1
AT5G04950.1	-3.09534	0.0097752	-1.70391	-0.0784436	6.24125e-27	0.989958	1.68552e-05	0.954677	nicotianamine synthase 1	-	-	1	-	-	1
AT5G39040.1	1.31427	0.437055	0.240726	0.0388528	7.20404e-06	0.274882	0.388465	0.954395	transporter associated with antigen processing protein 2	-	1	-	-	-	1
AT2G47530.1	1.72903	1.10084	2.82064	-0.805378	3.10021e-11	4.98443e-05	NA	0.954183	Pollen Ole e 1 allergen and extensin family protein	-	-	-	-	1	1
AT1G03680.1	-0.9316	0.316448	0.0607398	-0.0402144	8.01931e-05	0.300589	0.89307	0.954183	thioredoxin M-type 1	-	-	1	-	-	1
AT5G09690.2	-0.739036	-0.387743	-0.421591	-0.113542	0.0140944	0.299762	0.680481	0.954183	magnesium transporter 7	-	1	-	-	-	1
AT1G62830.1	-0.453066	-0.184933	-0.191591	0.0470914	0.00701993	0.420287	0.626723	0.954183	LSD1-like 1	-	-	-	-	1	1
AT1G79310.1	-1.24815	-0.0969152	-1.08382	-0.223672	0.0058569	0.918349	0.540475	0.954183	metacaspase 7	-	1	-	-	-	1
AT2G46490.1	0.54633	0.0274346	0.425477	0.0547318	0.000248958	0.934514	0.238445	0.954183		-	1	-	-	-	1
AT2G06520.1	-1.06038	0.207081	0.247637	-0.0632706	0.0205405	0.796885	0.641869	0.954015	photosystem II subunit X	-	1	-	-	-	1
AT2G32030.1	0.124348	-1.03973	0.303529	-0.232823	0.854255	0.0476415	0.907869	0.953855	Acyl-CoA N-acyltransferases (NAT) superfamily protein	-	-	-	1	-	1
AT1G29060.1	0.925868	0.296905	0.213504	-0.110801	1.06891e-05	0.310074	0.851614	0.953209	Target SNARE coiled-coil domain protein	-	1	-	-	-	1
AT5G03330.1	-0.372772	-0.706894	0.258721	-0.061488	0.031633	1.59545e-05	0.602762	0.953073	Cysteine proteinases superfamily protein	1	-	-	-	-	1
AT5G62710.1	-0.743156	0.195036	-0.421237	-0.0572734	7.88044e-07	0.331065	0.256429	0.952857	Leucine-rich repeat protein kinase family protein	-	1	-	-	-	1
AT2G46940.1	-2.46878	-0.870361	0.47204	0.19264	5.33573e-07	0.122366	0.808611	0.952544		1	-	-	-	-	1
AT1G72330.3	-0.16826	-0.402572	-0.26205	-0.0682514	0.406074	0.0390897	0.636747	0.952499	alanine aminotransferase 2	-	1	-	-	-	1
AT4G02550.3	0.517969	0.0437346	0.0977174	0.0541254	0.001703	0.892114	0.861203	0.952457		-	1	-	-	-	1
AT5G40820.2	-0.421922	0.0137748	-0.50719	-0.0624381	0.0135203	0.97116	0.186621	0.952319		-	-	1	-	-	1
AT5G41340.1	0.126313	-0.00258371	0.594071	-0.0401723	0.600534	0.995035	0.0035016	0.951665	ubiquitin conjugating enzyme 4	-	-	-	1	-	1
AT2G18260.1	-0.74963	-5.32733	-0.00055065	0.0880317	0.628646	0.00353209	0.999849	0.951595	syntaxin of plants 112	-	-	-	-	1	1
AT3G57970.1	-0.441118	-0.137782	-0.0311272	0.0609645	0.0335173	0.655678	0.967052	0.951595	Emsy N Terminus (ENT)/ plant Tudor-like domains-containing protein	-	1	-	-	-	1
AT5G11650.1	0.757241	-1.13514	1.0241	0.105451	0.0044744	2.12779e-05	0.0854793	0.951499	alpha/beta-Hydrolases superfamily protein	-	1	-	-	-	1
AT2G02570.1	0.247687	0.0929924	0.00456186	0.0461835	0.0445672	0.616044	0.993636	0.951476	nucleic acid binding;RNA binding	-	1	-	-	-	1
AT3G18850.1	0.210607	0.893843	-0.0522035	0.0703825	0.558854	0.00130055	0.950167	0.951476	lysophosphatidyl acyltransferase 5	-	1	-	-	-	1
AT4G32040.1	0.445282	-0.31034	0.116551	0.0443302	0.0003932	0.0306601	0.770882	0.951476	KNOTTED1-like homeobox gene 5	-	-	1	-	-	1
AT3G02710.1	-0.25699	0.112855	-0.182036	-0.0324163	0.0338442	0.503497	0.412653	0.951476	ARM repeat superfamily protein	1	-	-	-	-	1
AT5G11970.1	0.453173	0.0114475	0.351733	-0.100359	0.0135814	0.979486	0.668403	0.951291	Protein of unknown function (DUF3511)	1	-	-	-	-	1
AT3G45330.1	-1.83602	-3.91674	-0.0312229	-0.660077	0.0383173	1.59545e-05	0.997472	0.95097	Concanavalin A-like lectin protein kinase family protein	-	-	-	-	1	1
AT3G23090.3	-0.205646	-0.559721	0.524033	0.0808177	0.245012	0.000535093	0.317419	0.950874		-	-	1	-	-	1
AT4G17380.1	-2.12176	-0.642782	1.03659	-0.617259	0.0338269	0.618231	0.850465	0.950639	MUTS-like protein 4	-	1	-	-	-	1
AT2G34710.1	-0.622289	0.269209	-0.141447	-0.0371744	2.7188e-07	0.0539638	0.628103	0.950639	Homeobox-leucine zipper family protein / lipid-binding START domain-containing protein	1	-	-	-	-	1
AT1G67060.1	1.8493	-0.153021	0.827921	-0.0914101	2.21981e-17	0.700443	0.10675	0.950639		-	-	-	-	1	1
AT5G17270.1	-0.613553	-0.0623565	-1.52192	-0.0523089	7.0958e-05	0.830538	9.83258e-11	0.950639	Protein prenylyltransferase superfamily protein	1	-	-	-	-	1
AT2G42270.1	0.532439	-0.145784	0.0260192	0.0453002	3.95395e-05	0.451371	0.961885	0.950547	U5 small nuclear ribonucleoprotein helicase	-	-	1	-	-	1
AT5G03555.1	0.065119	-0.474027	-0.00591838	-0.0912968	0.751908	0.00276236	0.996048	0.950298	permease, cytosine/purines, uracil, thiamine, allantoin family protein	-	-	-	1	-	1
AT5G54230.1	2.514	-0.032299	2.08121	0.313711	2.78178e-14	0.968783	0.283862	0.950298	myb domain protein 49	-	1	-	-	-	1
AT2G40880.1	2.60168	0.71714	0.166094	0.0613342	1.10396e-26	0.0129625	0.756113	0.950221	cystatin A	-	1	-	-	-	1
AT1G48850.1	0.548382	0.00436497	0.0590821	-0.101422	0.0086307	0.992864	0.96079	0.950006	chorismate synthase, putative / 5-enolpyruvylshikimate-3-phosphate phospholyase, putative	-	-	1	-	-	1
AT3G49680.1	-0.722287	-0.1642	-0.452234	0.0612599	4.49736e-08	0.392976	0.214635	0.950006	branched-chain aminotransferase 3	-	1	-	-	-	1
AT2G24290.1	-0.492832	-0.172915	0.360254	-0.0528266	0.00276989	0.4275	0.278153	0.949646	Protein of unknown function (DUF1068)	-	-	-	-	1	1
AT3G20440.2	-1.59661	-0.0531296	-0.901623	-0.11795	8.13828e-07	0.942748	0.18846	0.949646	Alpha amylase family protein	-	-	1	-	-	1
AT3G63090.1	-0.557151	0.198211	-0.691315	0.0660583	0.00444343	0.442446	0.0466812	0.949646	Ubiquitin carboxyl-terminal hydrolase family protein	1	-	-	-	-	1
AT5G58280.2	-1.99766	-0.42195	0.295076	0.479671	0.0316424	0.752734	0.95695	0.949338		-	1	-	-	-	1
AT2G20725.1	-0.393573	-0.307101	0.253327	-0.0563443	0.0288617	0.12652	0.529877	0.949338	CAAX amino terminal protease family protein	-	-	-	1	-	1
AT3G02800.1	1.76779	-0.307165	0.608328	-0.301145	5.10853e-07	0.594172	0.827269	0.949298	Tyrosine phosphatase family protein	-	1	-	-	-	1
AT4G38770.1	-1.62617	0.153378	-0.298006	0.0941294	0.00115701	0.880394	0.689549	0.949036	proline-rich protein 4	-	-	-	-	1	1
AT4G04460.1	0.289799	1.07114	-0.599898	0.164949	0.30469	5.03144e-06	0.636957	0.948818	Saposin-like aspartyl protease family protein	-	1	-	-	-	1
AT1G27760.3	1.71899	0.37278	0.623788	0.0777038	3.96577e-21	0.117275	0.151533	0.948707	interferon-related developmental regulator family protein / IFRD protein family	-	1	-	-	-	1
AT5G01430.1	0.584674	0.126355	-0.117761	-0.051613	7.19818e-06	0.532044	0.798927	0.948367	Got1/Sft2-like vescicle transport protein family	-	-	-	1	-	1
AT4G28200.1	-0.507133	0.124505	-0.635197	-0.0394486	9.73294e-07	0.394533	0.000454648	0.948367		-	-	1	-	-	1
AT1G70940.1	0.138852	0.769271	-0.468717	0.0591165	0.620574	0.000591515	0.155499	0.948361	Auxin efflux carrier family protein	-	-	1	-	-	1
AT1G22790.1	-0.155594	-0.331377	0.0647888	-0.0496191	0.346231	0.0312146	0.897459	0.948346		1	-	-	-	-	1
AT1G10410.1	0.988006	0.608637	0.462076	0.103593	2.13319e-06	0.00907155	0.523078	0.948346	Protein of unknown function (DUF1336)	-	-	-	1	-	1
AT1G75210.1	0.234517	0.39434	0.0959197	0.0364458	0.0446095	0.00027817	0.750845	0.947621	HAD-superfamily hydrolase, subfamily IG, 5'-nucleotidase	-	1	-	-	-	1
AT3G05840.1	0.982849	0.0893338	0.334128	0.0372549	1.12309e-10	0.752858	0.0879126	0.946637	Protein kinase superfamily protein	1	-	-	-	-	1
AT4G14430.1	0.430472	0.299641	0.105228	-0.0699418	0.00597268	0.103756	0.872628	0.946591	indole-3-butyric acid response 10	-	-	-	1	-	1
AT3G05360.1	0.620226	-0.734501	0.321717	-0.23086	0.0507097	0.0339485	0.88574	0.946525	receptor like protein 30	-	-	1	-	-	1
AT3G57480.1	0.474399	-0.283396	0.446011	-0.141136	0.0201826	0.277009	0.681041	0.946467	zinc finger (C2H2 type, AN1-like) family protein	-	-	-	-	1	1
AT3G01420.1	2.31923	1.23817	1.65604	-0.123076	2.26487e-08	0.00836967	0.00374217	0.946467	Peroxidase superfamily protein	-	-	1	-	-	1
AT3G44730.2	1.62032	-0.113571	0.498035	-0.0592042	1.08708e-17	0.752608	0.10675	0.946383		1	-	-	-	-	1
AT3G11340.1	0.302177	-0.11482	0.681941	-0.461628	0.0212346	0.565022	0.874508	0.94617	UDP-Glycosyltransferase superfamily protein	1	-	-	-	-	1
AT1G77230.1	-0.26538	0.36904	-0.698997	0.134346	0.0983559	0.0201499	0.415793	0.94617	Tetratricopeptide repeat (TPR)-like superfamily protein	-	-	-	-	1	1
AT2G38280.1	-0.350083	0.144203	-0.652566	-0.0248891	0.00648086	0.425051	1.79335e-10	0.945767	AMP deaminase, putative / myoadenylate deaminase, putative	-	-	1	-	-	1
AT4G11060.1	-0.4632	-0.495624	-0.361678	-0.0674526	0.016378	0.0138677	0.378354	0.945356	mitochondrially targeted single-stranded DNA binding protein	1	-	-	-	-	1
AT5G52910.2	-0.557484	-0.0643498	0.221021	0.123195	0.0200026	0.888229	0.840688	0.945308		1	-	-	-	-	1
AT2G02870.1	0.716012	0.216238	0.322168	0.0537503	1.51242e-25	0.00638806	0.304824	0.945198	Galactose oxidase/kelch repeat superfamily protein	1	-	-	-	-	1
AT5G66631.1	-0.846811	0.130586	-0.760189	0.114737	0.0290229	0.839784	0.24066	0.945198	Tetratricopeptide repeat (TPR)-like superfamily protein	-	1	-	-	-	1
AT3G04181.1	1.12883	-2.10695	0.447823	-0.513033	0.0794282	0.00428558	0.933312	0.945105		1	-	-	-	-	1
AT2G26410.1	-0.228173	-0.989296	0.868227	-0.696225	0.515008	0.00106621	0.889428	0.944998	IQ-domain 4	-	-	-	-	1	1
AT2G29340.1	-1.07188	-2.45388	-0.202711	0.149097	0.19587	0.00179193	0.885814	0.944998	NAD-dependent epimerase/dehydratase family protein	-	1	-	-	-	1
AT3G22960.1	0.105984	-0.417413	-0.168633	-0.0612004	0.456499	0.000588657	0.720142	0.944226	Pyruvate kinase family protein	1	-	-	-	-	1
AT4G02260.1	0.136987	0.473792	-0.152644	-0.0427117	0.534622	0.0114558	0.610655	0.944226	RELA/SPOT homolog 1	-	-	1	-	-	1
AT5G67020.1	1.86025	0.531129	0.497083	0.133622	0.000231193	0.460915	0.590318	0.944226		-	-	1	-	-	1
AT3G43700.1	0.318236	0.177415	0.276066	0.059298	0.0415505	0.376914	0.463851	0.944226	BTB-POZ and MATH domain 6	1	-	-	-	-	1
AT4G38520.1	-0.505507	-0.175475	-0.211258	0.0303038	3.75086e-06	0.211779	0.198513	0.944029	Protein phosphatase 2C family protein	-	-	1	-	-	1
AT4G30350.1	-0.367053	-0.199589	0.289998	-0.0897266	0.0353094	0.395333	0.650947	0.944023	Double Clp-N motif-containing P-loop nucleoside triphosphate hydrolases superfamily protein	-	-	1	-	-	1
AT3G23280.1	0.535051	0.0746948	0.304558	0.0543304	0.000415323	0.787488	0.337841	0.944023	XB3 ortholog 5 in Arabidopsis thaliana	-	-	1	-	-	1
AT2G27500.1	1.10709	-0.51914	0.732703	0.0565256	1.48636e-10	0.0100089	0.00318982	0.944023	Glycosyl hydrolase superfamily protein	1	-	-	-	-	1
AT3G54950.1	0.652473	-0.17608	0.54648	0.0854729	0.00474573	0.635254	0.246314	0.943957	patatin-like protein 6	-	-	1	-	-	1
AT2G30490.1	0.997106	0.370227	0.617672	0.211704	2.4282e-06	0.178444	0.69099	0.943631	cinnamate-4-hydroxylase	1	-	-	-	-	1
AT1G52140.1	0.417003	0.184754	0.256939	-0.0571521	0.000739479	0.238303	0.473596	0.943401		-	-	1	-	-	1
AT5G11070.1	0.901012	0.795355	0.158835	0.113647	0.00270473	0.0132154	0.876292	0.943301		-	-	1	-	-	1
AT5G57800.1	2.05647	1.08257	1.58337	0.0681551	4.33569e-20	6.27105e-06	3.59502e-09	0.943301	Fatty acid hydroxylase superfamily	-	-	-	-	1	1
AT2G35920.3	-0.395939	-0.634919	-0.239122	-0.0513188	0.0465925	0.00127297	0.452679	0.943216		-	-	-	1	-	1
AT5G55210.1	-0.554343	-0.343704	0.144096	0.0667737	0.00546866	0.0976559	0.794151	0.943199		-	-	1	-	-	1
AT4G29340.1	-0.456708	-4.44612	1.05826	0.71307	0.245682	9.09361e-17	0.861111	0.942254	profilin 4	-	1	-	-	-	1
AT1G79750.1	0.22685	-0.101964	-0.0742851	-0.0427665	0.00508842	0.354619	0.837331	0.942088	NADP-malic enzyme 4	-	1	-	-	-	1
AT3G60190.1	-0.831824	-0.036179	-0.0364634	0.0561689	2.37756e-06	0.926082	0.948475	0.941969	DYNAMIN-like 1E	-	1	-	-	-	1
AT1G52565.1	1.59118	0.423141	2.21047	0.288724	6.0405e-05	0.478402	0.129279	0.941969		1	-	-	-	-	1
AT5G52540.1	-0.570307	0.0577558	-0.068739	0.0721427	0.000556676	0.858134	0.919714	0.941896	Protein of unknown function (DUF819)	-	-	-	1	-	1
AT2G14620.1	0.652044	0.339735	1.27589	0.293101	0.00983638	0.265357	0.518251	0.941896	xyloglucan endotransglucosylase/hydrolase 10	-	1	-	-	-	1
AT1G74240.1	-0.601262	-0.121485	-0.511521	-0.0774924	0.0322919	0.801272	0.208595	0.941896	Mitochondrial substrate carrier family protein	-	-	1	-	-	1
AT4G11320.1	-1.43362	0.145783	-0.483863	0.121684	3.31614e-05	0.829512	0.533074	0.941404	Papain family cysteine protease	1	-	-	-	-	1
AT3G51500.1	0.316849	-0.055685	0.108423	-0.0688589	0.03832	0.840799	0.854343	0.941308		-	-	-	1	-	1
AT2G37930.3	-1.09139	-0.0117744	-0.838612	0.0817406	1.24566e-05	0.983029	0.0274172	0.941308		-	-	-	1	-	1
AT3G18170.2	-0.779335	-1.35915	-0.222443	-0.130223	0.000140707	1.85483e-11	0.837254	0.941284		-	-	1	-	-	1
AT1G72310.1	1.11488	-0.370834	0.155824	-0.0685181	3.27809e-10	0.102851	0.767011	0.941284	RING/U-box superfamily protein	-	-	-	1	-	1
AT1G10870.2	0.340663	0.180812	0.100163	0.042052	0.00424802	0.229781	0.752272	0.941252		-	-	-	-	1	1
AT1G71880.1	-2.03762	-2.96193	-0.665993	-0.12886	4.2304e-21	6.40372e-43	0.365372	0.941252	sucrose-proton symporter 1	-	1	-	-	-	1
AT1G49230.1	-4.51524	-1.24244	-1.25838	-0.162815	1.11153e-26	5.75462e-05	0.118415	0.941252	RING/U-box superfamily protein	-	-	-	1	-	1
AT3G13440.1	-0.128722	-0.273073	-0.134836	0.0377578	0.300102	0.0219798	0.579399	0.940858	S-adenosyl-L-methionine-dependent methyltransferases superfamily protein	-	-	-	1	-	1
AT2G25000.1	-2.37236	-0.897707	0.169311	0.351939	7.91703e-11	0.0289486	0.963617	0.940755	WRKY DNA-binding protein 60	1	-	-	-	-	1
AT4G39550.1	-0.665038	-0.353188	-0.641939	0.100067	0.00634529	0.205693	0.23157	0.940324	Galactose oxidase/kelch repeat superfamily protein	1	-	-	-	-	1
AT5G60190.1	0.393217	-0.193476	-0.0862109	-0.0732829	0.0467279	0.481552	0.894035	0.939541	Cysteine proteinases superfamily protein	-	-	-	-	1	1
AT4G08780.1	-2.99117	0.00366697	-2.32655	-0.300347	4.51737e-46	0.992841	0.133904	0.939541	Peroxidase superfamily protein	-	-	1	-	-	1
AT5G03970.1	-0.0808664	0.0780935	-0.566566	0.0471629	0.755305	0.818117	0.00711079	0.939454	F-box associated ubiquitination effector family protein	1	-	-	-	-	1
AT5G18700.1	-0.650125	0.0153799	0.0955297	-0.0718663	3.51224e-05	0.965939	0.875528	0.939158	Protein kinase family protein with ARM repeat domain	-	-	-	1	-	1
AT4G02380.3	0.90721	1.12006	0.465914	0.249374	1.78785e-05	1.47954e-07	0.815091	0.939158		-	-	-	-	1	1
AT1G11890.1	0.368857	0.263345	0.212294	0.0510496	0.000655608	0.0291103	0.485562	0.939053	Synaptobrevin family protein	-	1	-	-	-	1
AT3G26440.5	0.783056	0.00610142	0.0717851	0.197608	4.80141e-06	0.988836	0.971633	0.938704		-	1	-	-	-	1
AT5G64560.1	0.0816966	0.462468	-0.293628	-0.0623883	0.751813	0.0205896	0.405909	0.938704	magnesium transporter 9	1	-	-	-	-	1
AT5G39660.1	0.432183	-0.391115	-0.0836474	0.095968	0.00834161	0.0340887	0.925149	0.938649	cycling DOF factor 2	-	1	-	-	-	1
AT4G17890.1	0.403724	0.147268	-0.122935	-0.0683719	0.000747932	0.377361	0.822152	0.938534	ARF-GAP domain 8	-	1	-	-	-	1
AT2G02880.1	-0.421276	0.356786	-0.543207	-0.0717116	0.0387443	0.0943522	0.113855	0.938377	mucin-related	-	-	-	1	-	1
AT1G08200.1	0.955524	0.300565	0.684889	0.0478433	1.15047e-35	0.000470958	0.000314565	0.93824	UDP-D-apiose/UDP-D-xylose synthase 2	-	1	-	-	-	1
AT5G35680.3	0.547011	0.283521	-0.00984939	0.0581999	5.83813e-05	0.0817615	0.985306	0.937545	Nucleic acid-binding, OB-fold-like protein	-	-	-	1	-	1
AT3G48830.1	-0.702957	0.370527	-0.710322	0.142254	0.0436655	0.377706	0.375324	0.937545	polynucleotide adenylyltransferase family protein / RNA recognition motif (RRM)-containing protein	-	1	-	-	-	1
AT5G09230.7	1.09803	0.0485614	0.702543	0.0688413	2.02612e-11	0.893592	0.017675	0.937545	sirtuin 2	-	1	-	-	-	1
AT1G78170.1	2.02805	0.363693	0.133057	-0.119357	0.00785142	0.807357	0.898901	0.93719		-	-	-	1	-	1
AT1G29000.1	2.7374	0.912271	2.79398	1.05123	1.3087e-09	0.0959597	NA	0.936818	Heavy metal transport/detoxification superfamily protein	1	-	-	-	-	1
AT4G12370.1	1.69329	2.89619	0.735883	0.749736	0.210322	0.0222348	NA	0.936818		-	1	-	-	-	1
AT4G26940.1	0.581778	0.187359	0.261679	-0.0631557	2.58679e-11	0.0850518	0.477272	0.936818	Galactosyltransferase family protein	-	1	-	-	-	1
AT1G45474.1	-2.02635	-0.0850002	0.414382	-0.0775176	6.14594e-06	0.921787	0.313173	0.936818	photosystem I light harvesting complex gene 5	-	-	1	-	-	1
AT4G09140.1	-0.44704	-0.0670437	-0.382355	0.0541094	0.00211824	0.785866	0.140034	0.936818	MUTL-homologue 1	-	-	-	1	-	1
AT2G01990.2	-2.56974	-0.12275	-0.773638	-0.0741146	2.54399e-05	0.916322	0.0205718	0.936818		-	-	-	-	1	1
AT2G41960.1	0.4538	0.129917	0.121245	0.0318014	2.6789e-09	0.199443	0.52013	0.936513		-	-	1	-	-	1
AT1G68880.1	-1.12153	-0.600294	-0.35272	0.174539	7.20404e-06	0.0345833	0.795174	0.936122	basic leucine-zipper 8	-	-	1	-	-	1
AT1G09170.5	2.18658	0.948547	2.5441	-0.286372	8.23334e-18	0.000727655	0.0368263	0.936122		1	-	-	-	-	1
AT5G35410.1	0.438932	-0.150358	0.0177051	-0.13724	0.0193	0.588887	0.988649	0.936056	Protein kinase superfamily protein	-	-	1	-	-	1
AT2G36210.1	1.18429	0.266042	-0.526927	-0.469186	0.00088253	0.649265	0.89484	0.936056	SAUR-like auxin-responsive protein family	-	-	-	1	-	1
AT5G37370.1	0.498456	0.0234627	0.0566131	0.0478984	0.000190875	0.938508	0.887704	0.936056	PRP38 family protein	-	-	-	1	-	1
AT5G15120.1	1.48645	2.18169	0.476614	0.205715	0.00136995	5.53143e-07	0.744741	0.936056	Protein of unknown function (DUF1637)	-	-	1	-	-	1
AT5G14920.1	-1.26947	-0.0231338	-0.986661	-0.168283	1.41519e-08	0.965121	0.242184	0.936056	Gibberellin-regulated family protein	-	-	1	-	-	1
AT1G06720.2	-0.621749	0.00493862	-1.45756	-0.0828122	0.000330894	0.991077	2.13932e-06	0.936056		-	-	-	-	1	1
AT5G60150.2	-0.695733	0.176262	-0.215744	-0.0915478	0.00158445	0.594506	0.732365	0.936003		-	-	-	-	1	1
AT1G11070.4	3.04128	-0.0445817	0.334947	-0.303825	0.0487171	0.989958	0.89584	0.935818		-	1	-	-	-	1
AT5G22400.1	-0.434403	-0.229167	-0.12177	0.0665464	0.00234719	0.192509	0.809898	0.935818	Rho GTPase activating protein with PAK-box/P21-Rho-binding domain	-	-	1	-	-	1
AT1G29230.1	1.84435	1.77388	2.10761	0.21465	0.00275382	0.00643918	0.0205529	0.935818	CBL-interacting protein kinase 18	-	1	-	-	-	1
AT4G17530.1	1.04983	0.183482	0.878915	-0.0623679	5.65195e-27	0.162376	0.000210374	0.935818	RAB GTPase homolog 1C	-	1	-	-	-	1
AT3G23325.1	0.643427	0.294008	-0.0691751	0.0898585	0.00605399	0.322787	0.932045	0.935786	Splicing factor 3B subunit 5/RDS3 complex subunit 10	-	1	-	-	-	1
AT2G22620.1	0.825756	-0.22091	0.110597	-0.292759	0.00458119	0.635647	0.96818	0.935782	Rhamnogalacturonate lyase family protein	-	-	1	-	-	1
AT3G44260.1	-3.03599	-1.65931	0.0563263	-0.125757	7.41197e-07	0.0085785	0.963686	0.935782	Polynucleotidyl transferase, ribonuclease H-like superfamily protein	-	-	1	-	-	1
AT4G27500.1	0.425255	0.157199	0.194235	-0.0526528	7.64764e-05	0.281388	0.531155	0.935782	proton pump interactor 1	-	-	-	-	1	1
AT4G12020.2	0.747603	0.133881	0.418384	0.0856982	5.41174e-09	0.504047	0.355549	0.935782	protein kinase family protein	-	-	1	-	-	1
AT5G23690.1	-0.704981	0.0760051	0.114374	-0.0719341	0.000621914	0.831141	0.834465	0.93528	Polynucleotide adenylyltransferase family protein	1	-	-	-	-	1
AT3G46580.1	0.606857	0.245651	0.078041	0.105815	0.0281879	0.509326	0.934361	0.935247	methyl-CPG-binding domain protein 5	-	1	-	-	-	1
AT1G74470.1	-1.91477	-0.113624	-0.0837046	0.0594517	2.06414e-07	0.883024	0.857573	0.935169	Pyridine nucleotide-disulphide oxidoreductase family protein	-	1	-	-	-	1
AT3G59500.1	0.402098	0.107531	0.0992435	-0.0489537	0.00333647	0.618354	0.778254	0.935169	Integral membrane HRF1 family protein	-	1	-	-	-	1
AT5G41050.1	-6.87531	-4.48993	-0.174503	-0.068561	1.01556e-05	0.000769649	0.708255	0.935169	Pollen Ole e 1 allergen and extensin family protein	1	-	-	-	-	1
AT1G09980.1	0.325125	0.229141	0.0997867	-0.0394999	0.000588219	0.0281346	0.702512	0.935169	Putative serine esterase family protein	-	-	1	-	-	1
AT1G16130.1	2.88287	1.76706	1.16544	-0.286195	1.42354e-14	6.41534e-06	0.468427	0.935169	wall associated kinase-like 2	-	-	1	-	-	1
AT2G03640.4	0.239012	0.221603	0.27495	-0.0551223	0.0228979	0.05433	0.333934	0.935169	Nuclear transport factor 2 (NTF2) family protein with RNA binding (RRM-RBD-RNP motifs) domain	-	-	-	-	1	1
AT3G06868.1	-0.104468	0.489307	-0.554499	0.102505	0.653867	0.00902143	0.283119	0.935169		-	1	-	-	-	1
AT5G60920.1	-0.44428	-0.369149	0.106494	-0.0718959	7.70852e-07	9.21209e-05	0.849139	0.935071	COBRA-like extracellular glycosyl-phosphatidyl inositol-anchored protein family	1	-	-	-	-	1
AT4G04640.1	-1.41839	-0.538435	-0.0191865	-0.0546294	4.38624e-06	0.169047	0.970603	0.934964	ATPase, F1 complex, gamma subunit protein	-	1	-	-	-	1
AT2G23380.1	0.527812	0.224817	0.0621399	-0.0535161	1.48539e-05	0.142217	0.885814	0.934964	SET domain-containing protein	-	1	-	-	-	1
AT1G50290.1	0.980511	-0.0790847	0.376514	0.135085	0.00825941	0.920081	0.66855	0.934863		-	-	-	1	-	1
AT1G18650.1	-1.30207	-0.423017	-0.151135	-0.0786126	6.69665e-06	0.263189	0.791754	0.934635	plasmodesmata callose-binding protein 3	-	1	-	-	-	1
AT3G19010.1	-1.14465	-1.07392	-0.307031	-0.294431	0.00424516	0.0131678	0.900701	0.934399	2-oxoglutarate (2OG) and Fe(II)-dependent oxygenase superfamily protein	-	-	-	-	1	1
AT3G02110.1	-0.0450382	0.728388	0.0958542	0.0521673	0.920747	0.0171323	0.801702	0.934399	serine carboxypeptidase-like 25	-	-	-	-	1	1
AT5G19120.1	-1.13748	-1.79875	-0.486841	-0.0999928	1.11844e-05	2.03772e-12	0.34451	0.934399	Eukaryotic aspartyl protease family protein	1	-	-	-	-	1
AT1G75390.1	1.53197	1.57796	0.522183	0.0931311	7.04352e-14	1.38827e-14	0.254909	0.934399	basic leucine-zipper 44	1	-	-	-	-	1
AT5G22920.1	0.287986	-1.00957	0.12058	-0.192157	0.496589	0.00634132	0.9436	0.934282	CHY-type/CTCHY-type/RING-type Zinc finger protein	-	1	-	-	-	1
AT2G14170.1	-0.224351	-0.102041	0.115487	-0.0611937	0.0248049	0.462272	0.793646	0.934282	aldehyde dehydrogenase 6B2	-	-	1	-	-	1
AT4G32650.1	-0.411165	-0.562966	-0.174503	-0.269898	0.0345669	0.00458578	0.941918	0.934167	potassium channel in Arabidopsis thaliana 3	-	-	1	-	-	1
AT1G55690.1	1.29818	0.273334	-0.124142	0.0571586	7.94446e-42	0.0184946	0.748877	0.934167	Sec14p-like phosphatidylinositol transfer family protein	1	-	-	-	-	1
AT3G62720.1	0.641558	0.336896	0.546264	0.0920355	0.00895614	0.297225	0.205806	0.934167	xylosyltransferase 1	-	-	1	-	-	1
AT4G02510.1	-0.311729	-0.25011	-0.449284	0.0615451	0.00322179	0.0342906	0.0946575	0.933362	translocon at the outer envelope membrane of chloroplasts 159	-	-	1	-	-	1
AT2G38152.1	0.819452	-0.567275	1.13609	0.463341	0.0461398	0.304977	0.702937	0.932917	alpha 1,4-glycosyltransferase family protein	-	1	-	-	-	1
AT3G14470.1	-0.124397	-0.744784	0.326192	-0.100117	0.699906	0.00425658	0.58138	0.932917	NB-ARC domain-containing disease resistance protein	-	1	-	-	-	1
AT1G63820.1	1.03457	0.76542	0.986802	0.251647	0.00194377	0.0427033	0.454932	0.932917	CCT motif family protein	-	-	1	-	-	1
AT5G01330.1	-1.18578	-1.38522	-3.36007	-0.551345	9.56417e-06	6.26741e-07	0.227705	0.932872	pyruvate decarboxylase-3	-	-	-	1	-	1
AT1G68990.2	-0.725421	-0.100127	-1.13328	-0.07396	1.03079e-05	0.723438	2.03901e-05	0.93283	male gametophyte defective 3	-	1	-	-	-	1
AT5G08440.3	0.321379	0.0456296	0.000116367	-0.0538857	0.0100935	0.84336	0.999849	0.93149		-	1	-	-	-	1
AT1G55080.1	0.66985	0.363705	0.0653987	0.0831397	0.00462071	0.224058	0.923477	0.93143		-	1	-	-	-	1
AT5G23120.2	-0.9167	-0.147395	0.0941642	-0.0667336	0.0363143	0.856112	0.85107	0.93143		-	1	-	-	-	1
AT5G37630.1	-0.46414	0.00104039	0.124631	-0.0806281	0.00590578	0.997749	0.833405	0.93143	ARM repeat superfamily protein	-	-	1	-	-	1
AT4G01540.1	-0.452556	-1.5731	0.713168	0.213636	0.022398	1.30004e-16	0.558564	0.93143	NAC with transmembrane motif1	-	1	-	-	-	1
AT3G55600.1	0.767177	-0.0194746	0.459613	-0.0764913	1.7373e-05	0.962922	0.183914	0.93143	Membrane fusion protein Use1	-	-	1	-	-	1
AT5G20590.1	-0.456711	0.0808812	-0.45751	0.0527832	2.30639e-05	0.633912	0.031394	0.93143	TRICHOME BIREFRINGENCE-LIKE 5	-	-	-	1	-	1
AT4G07960.1	1.57178	2.15418	-0.183735	-0.123955	9.21251e-06	7.87015e-10	0.835237	0.931379	Cellulose-synthase-like C12	-	-	-	1	-	1
AT5G63420.1	-1.17612	-0.168126	-0.450941	-0.13531	2.92738e-17	0.361044	0.55498	0.931379	RNA-metabolising metallo-beta-lactamase family protein	-	-	1	-	-	1
AT1G23840.1	-3.93459	-2.49777	0.663376	0.374398	0.0322057	0.149212	0.802027	0.931221		-	-	1	-	-	1
AT5G64100.1	-1.4935	-2.42342	-0.884321	-0.495725	0.101375	0.00827096	0.798239	0.931221	Peroxidase superfamily protein	-	1	-	-	-	1
AT3G05220.1	-0.523109	-0.0109667	-0.320043	0.0952552	0.00581358	0.981309	0.548924	0.931221	Heavy metal transport/detoxification superfamily protein	1	-	-	-	-	1
AT1G77400.1	-1.15646	-0.855883	-0.708093	0.0804915	1.83388e-05	0.0012285	0.0336348	0.931221		-	1	-	-	-	1
AT3G06200.1	-0.396855	0.0140367	-0.467527	-0.0596554	0.0347106	0.973596	0.0535873	0.931164	P-loop containing nucleoside triphosphate hydrolases superfamily protein	1	-	-	-	-	1
AT1G20300.1	-0.800071	0.0821877	-1.04256	-0.0741989	5.39513e-07	0.765241	5.70932e-05	0.930716	Pentatricopeptide repeat (PPR) superfamily protein	-	1	-	-	-	1
AT3G59810.1	-0.450674	-0.282028	-0.313184	-0.0923146	0.0169678	0.206138	0.54103	0.930695	Small nuclear ribonucleoprotein family protein	-	-	-	-	1	1
AT4G14455.1	0.327533	-0.0725292	0.0216675	-0.111226	0.0364188	0.783005	0.982152	0.930502	Target SNARE coiled-coil domain protein	-	1	-	-	-	1
AT1G64400.1	0.0841869	-2.79659	0.198574	-0.406193	0.934765	8.97643e-06	0.955646	0.930349	AMP-dependent synthetase and ligase family protein	-	-	1	-	-	1
AT2G34240.1	-2.19128	0.306948	-1.40163	-0.478312	0.00229431	0.759663	0.62096	0.929659	Protein with domains of unknown function DUF627 and DUF632	-	-	-	1	-	1
AT4G12800.2	-1.9744	1.82982	0.113832	0.0530391	0.0397518	0.0925667	0.736058	0.929435		-	-	1	-	-	1
AT2G32190.1	1.66766	0.947084	0.859699	-0.382888	0.00747044	0.222547	0.718019	0.929435		-	-	-	-	1	1
AT5G48320.1	-1.03675	-2.00511	-0.596667	-0.155318	0.0121206	7.08235e-07	0.466647	0.929435	Cysteine/Histidine-rich C1 domain family protein	-	1	-	-	-	1
AT5G40690.1	1.75395	0.10619	1.34032	0.147385	3.64436e-27	0.728908	0.0152635	0.929392		-	-	1	-	-	1
AT2G35660.1	0.0206457	-1.48931	0.2827	0.115014	0.98449	0.0441836	0.685214	0.928967	FAD/NAD(P)-binding oxidoreductase family protein	1	-	-	-	-	1
AT1G48170.1	-0.483307	-0.0203768	-0.371855	-0.0993542	0.00533314	0.954554	0.482651	0.928834		-	-	-	1	-	1
AT2G44600.1	0.913774	0.142549	0.544866	-0.122517	0.00120501	0.770043	0.359739	0.928722		-	1	-	-	-	1
AT4G32050.1	-0.434754	0.134124	-0.100813	-0.083936	0.0147741	0.606744	0.868314	0.928623	neurochondrin family protein	-	1	-	-	-	1
AT3G09260.1	-0.475318	0.372793	-0.265832	0.110707	0.0333566	0.163364	0.688874	0.92822	Glycosyl hydrolase superfamily protein	-	-	1	-	-	1
AT5G06250.4	-6.3359	-2.20212	-0.342159	0.190092	1.11926e-05	0.0416258	0.790136	0.927538		-	-	1	-	-	1
AT5G04420.1	0.191671	0.125157	0.223784	-0.0441698	0.029409	0.250223	0.260087	0.927538	Galactose oxidase/kelch repeat superfamily protein	-	1	-	-	-	1
AT3G51920.1	-0.783365	-1.1434	0.201029	-0.164917	0.0901174	0.0160973	0.864901	0.92715	calmodulin 9	-	1	-	-	-	1
AT5G65207.1	1.63352	0.615649	0.932741	0.14551	0.000185094	0.298903	0.122736	0.927131		-	-	-	1	-	1
AT1G51965.1	-0.491829	0.0740417	-0.400299	-0.0780303	0.00728515	0.820642	0.248721	0.926853	ABA Overly-Sensitive 5	1	-	-	-	-	1
AT1G70480.2	1.33184	0.847772	0.442293	-0.0514016	3.00089e-15	1.38737e-06	0.0215557	0.926853	Domain of unknown function (DUF220)	-	1	-	-	-	1
AT3G07510.3	-0.746385	0.0606192	-0.24473	0.0987652	0.000365416	0.87827	0.671426	0.926837		-	-	1	-	-	1
AT2G26380.1	-4.01678	-2.34634	-0.45886	-0.901373	0.0308923	0.29924	NA	0.926624	Leucine-rich repeat (LRR) family protein	-	-	1	-	-	1
AT5G54160.1	0.875555	0.9266	0.661549	-0.114548	4.07786e-07	1.51421e-07	0.176516	0.926624	O-methyltransferase 1	-	-	-	1	-	1
AT5G64330.1	-0.723936	-0.810438	-0.40491	-0.0654224	9.79074e-08	3.78598e-09	0.135887	0.926624	Phototropic-responsive NPH3 family protein	1	-	-	-	-	1
AT1G25390.1	-0.967257	-0.840173	-0.263249	-0.174495	0.00104278	0.00822844	0.826203	0.925951	Protein kinase superfamily protein	-	-	1	-	-	1
AT1G24350.3	0.689202	-0.232564	0.196987	0.104428	8.1109e-07	0.21535	0.767914	0.925883	Acid phosphatase/vanadium-dependent haloperoxidase-related protein	1	-	-	-	-	1
AT3G60690.1	1.29082	0.505857	-0.0759497	-0.0859297	1.7972e-20	0.00112263	0.909713	0.925667	SAUR-like auxin-responsive protein family	-	1	-	-	-	1
AT1G55350.5	-0.63721	-0.225561	-0.47241	-0.0495135	1.14519e-06	0.182929	0.00819934	0.925617	calpain-type cysteine protease family	-	-	1	-	-	1
AT5G60170.2	0.332462	0.0718958	-0.12416	0.056778	0.000245339	0.621788	0.716156	0.925346	RNA binding (RRM/RBD/RNP motifs) family protein	-	-	1	-	-	1
AT1G07620.2	-1.35867	-3.46278	-0.796051	-0.725271	0.00280769	1.31745e-13	0.879345	0.92509		1	-	-	-	-	1
AT3G24463.1	0.116614	-0.654728	0.532617	0.24953	0.766138	0.0476034	0.718332	0.92509		-	-	-	-	1	1
AT4G29720.1	-1.80249	-0.506583	-0.345075	-0.0638238	2.03617e-20	0.0249702	0.205806	0.925001	polyamine oxidase 5	-	-	1	-	-	1
AT1G50840.2	-1.02859	-0.00334793	-0.93709	-0.0600463	5.37783e-06	0.994766	1.30393e-06	0.924741		1	-	-	-	-	1
AT1G21530.2	-2.3211	-0.806008	-3.86789	-1.27875	5.39383e-07	0.121874	NA	0.924515	AMP-dependent synthetase and ligase family protein	-	-	1	-	-	1
AT2G40060.1	0.328179	0.163049	-0.00511421	-0.0468745	1.17734e-06	0.0365094	0.988721	0.924515	Clathrin light chain protein	1	-	-	-	-	1
AT4G39570.1	-0.715134	-0.352175	0.258449	-0.105403	0.00342627	0.233181	0.673147	0.924515	Galactose oxidase/kelch repeat superfamily protein	-	-	-	1	-	1
AT4G21740.1	-0.815164	-0.54255	0.389072	-0.111104	2.96992e-06	0.00225438	0.479279	0.924515		1	-	-	-	-	1
AT3G21510.1	0.670588	-0.455017	0.730069	0.15777	0.0444989	0.283812	0.292197	0.924439	histidine-containing phosphotransmitter 1	1	-	-	-	-	1
AT3G18630.1	-1.02812	0.0835546	-0.721648	0.153038	0.0014461	0.888229	0.30143	0.924431	uracil dna glycosylase	-	-	-	1	-	1
AT2G20080.1	1.47454	0.00608779	3.71425	1.26642	6.69024e-05	0.994242	NA	0.924273		-	-	1	-	-	1
AT4G21230.1	-1.07883	-0.824809	-0.355291	0.46287	6.62817e-05	0.00412711	0.919714	0.924273	cysteine-rich RLK (RECEPTOR-like protein kinase) 27	1	-	-	-	-	1
AT5G54530.1	-2.14132	-1.60266	0.54154	-0.148269	0.0205872	0.0516659	0.453977	0.923649	Protein of unknown function, DUF538	1	-	-	-	-	1
AT2G27490.1	0.62359	0.129989	0.195371	0.0871627	0.000439307	0.652904	0.696838	0.923618	dephospho-CoA kinase family	-	-	-	-	1	1
AT2G41160.1	0.775659	0.163007	0.401399	0.0751429	2.88366e-10	0.37217	0.195904	0.923618	Ubiquitin-associated (UBA) protein	1	-	-	-	-	1
AT3G49210.1	1.30124	-0.0520878	0.766316	-0.235958	4.33457e-13	0.895655	0.516598	0.922944	O-acyltransferase (WSD1-like) family protein	-	-	-	1	-	1
AT5G44530.2	1.12796	0.189965	0.264517	-0.0739134	1.65096e-24	0.215056	0.458054	0.922811		-	-	-	1	-	1
AT1G70370.1	-0.629159	-0.235281	0.228165	0.0957368	0.00017937	0.300766	0.67028	0.922772	polygalacturonase 2	-	-	1	-	-	1
AT4G10570.1	0.334609	0.109879	-0.0383795	0.0564162	0.000706392	0.439074	0.928485	0.92272	ubiquitin-specific protease 9	-	-	-	-	1	1
AT2G29525.1	0.615212	0.305447	0.66928	0.149736	0.00439891	0.24522	0.301022	0.922259	Arabidopsis Inositol phosphorylceramide synthase 3	-	-	-	-	1	1
AT2G26250.1	1.31392	0.629033	0.341765	-0.0636624	1.85423e-10	0.00739807	0.189563	0.922164	3-ketoacyl-CoA synthase 10	-	-	1	-	-	1
AT1G56210.1	-1.00594	-0.508273	-0.903308	-0.121837	1.55393e-07	0.0165915	0.0448637	0.922145	Heavy metal transport/detoxification superfamily protein	-	-	1	-	-	1
AT5G19430.4	0.564875	0.22228	0.13589	-0.0727986	0.0105341	0.471088	0.759177	0.9218		-	-	1	-	-	1
AT3G57880.1	0.695921	0.282849	0.292721	0.0823139	0.00219784	0.369225	0.453754	0.921568	Calcium-dependent lipid-binding (CaLB domain) plant phosphoribosyltransferase family protein	-	-	1	-	-	1
AT5G63630.2	-0.886676	0.0954119	-0.607955	-0.117876	0.00164222	0.852983	0.214031	0.921568		1	-	-	-	-	1
AT4G31750.1	1.14689	0.0826796	0.687402	0.073778	9.92436e-18	0.743616	0.00533146	0.921064	HOPW1-1-interacting 2	-	1	-	-	-	1
AT1G17730.1	0.268136	-0.111513	0.100921	0.0539362	0.0367735	0.547375	0.749565	0.919736	vacuolar protein sorting 46.1	1	-	-	-	-	1
AT5G40320.1	-1.17728	-0.208045	0.51929	0.912449	0.000764011	0.699405	NA	0.919693	Cysteine/Histidine-rich C1 domain family protein	-	-	1	-	-	1
AT2G03810.1	0.494854	0.104064	0.0967773	-0.0863666	0.00326031	0.712252	0.8673	0.919625	18S pre-ribosomal assembly protein gar2-related	-	-	-	1	-	1
AT5G23380.1	0.0378223	-1.1869	0.0964213	-0.105865	0.930803	1.0294e-05	0.898901	0.91962	Protein of unknown function (DUF789)	-	-	1	-	-	1
AT4G18440.1	-0.615196	0.105519	-0.248829	0.154972	0.000342816	0.713797	0.795674	0.91962	L-Aspartase-like family protein	1	-	-	-	-	1
AT4G34510.1	2.07792	0.205385	-0.0138845	-0.176798	0.000358126	0.861052	0.992001	0.919499	3-ketoacyl-CoA synthase 17	1	-	-	-	-	1
AT1G23850.1	-1.03534	-0.0654933	-0.871281	-0.317109	0.000641568	0.919163	0.593649	0.919499		-	-	-	-	1	1
AT4G16680.2	1.07893	0.0421573	0.412504	0.15187	6.19622e-06	0.942151	0.585642	0.919499		1	-	-	-	-	1
AT3G15470.1	0.346271	0.0093331	-0.00203066	0.0546377	5.81913e-05	0.962631	0.997029	0.919111	Transducin/WD40 repeat-like superfamily protein	-	-	1	-	-	1
AT5G13290.2	-0.905889	0.202192	-0.209288	0.104084	0.000369857	0.580627	0.732242	0.919021	Protein kinase superfamily protein	-	1	-	-	-	1
AT5G15410.1	2.16876	2.47107	0.214803	-0.0893174	1.95845e-12	7.90964e-16	0.651328	0.91884	Cyclic nucleotide-regulated ion channel family protein	-	1	-	-	-	1
AT5G16000.1	-1.29982	-0.646899	-0.357862	-0.0794293	1.55575e-08	0.0114719	0.285647	0.91884	NSP-interacting kinase 1	-	-	-	1	-	1
AT1G70470.1	-2.43998	-1.00321	-0.129991	0.119004	1.17322e-12	0.00516924	0.869631	0.918473		1	-	-	-	-	1
AT4G00820.1	-0.136527	-0.425945	-0.18185	-0.111762	0.298813	0.000287356	0.78855	0.918473	IQ-domain 17	1	-	-	-	-	1
AT1G65080.1	-1.41041	0.0618655	-0.580462	-0.108532	0.000122543	0.934719	0.180028	0.918394	Membrane insertion protein, OxaA/YidC with tetratricopeptide repeat domain	-	-	-	1	-	1
AT3G63280.4	-0.456277	-0.260671	0.238006	-0.118795	0.0145563	0.263209	0.74013	0.917856		-	-	1	-	-	1
AT2G27060.1	0.587453	0.0210141	0.201335	-0.0470277	0.00124453	0.959228	0.309761	0.917856	Leucine-rich repeat protein kinase family protein	-	-	1	-	-	1
AT1G66050.1	1.70991	0.578715	1.00481	-0.182007	2.53804e-06	0.223241	0.153528	0.917856	Zinc finger (C3HC4-type RING finger) family protein	-	1	-	-	-	1
AT1G05410.1	0.143671	-0.326938	0.223599	0.0746648	0.329419	0.0190546	0.536524	0.917764	Protein of unknown function (DUF1423)	-	-	1	-	-	1
AT5G47970.1	-0.511617	-0.183157	-0.1651	-0.0716525	0.00165551	0.384259	0.663649	0.917526	Aldolase-type TIM barrel family protein	-	-	1	-	-	1
AT1G80460.1	0.246549	-0.886245	0.292248	-0.186004	0.230601	1.03647e-06	0.794063	0.917412	Actin-like ATPase superfamily protein	-	1	-	-	-	1
AT2G17760.1	2.02936	0.570085	0.514791	0.192486	7.18715e-31	0.0050434	0.592012	0.917412	Eukaryotic aspartyl protease family protein	-	-	-	1	-	1
AT1G76900.1	0.653831	-0.349993	0.426849	0.0571265	4.13133e-13	0.000437703	0.0287457	0.917304	tubby like protein 1	-	-	1	-	-	1
AT4G15130.1	1.31812	0.0191104	0.00694377	0.0790267	8.61577e-14	0.965121	0.990519	0.916931	phosphorylcholine cytidylyltransferase2	-	-	-	1	-	1
AT2G26710.1	-0.457845	-0.919887	-0.214773	-0.1518	0.0300639	5.26844e-06	0.817232	0.916603	Cytochrome P450 superfamily protein	-	-	1	-	-	1
AT5G44780.1	-0.838534	0.0775234	-0.94509	-0.0770856	0.000139962	0.855409	9.11807e-05	0.916603		-	-	-	1	-	1
AT5G02040.1	0.338897	0.04141	0.469003	0.125176	0.0243791	0.888214	0.381675	0.916441	prenylated RAB acceptor 1.A1	1	-	-	-	-	1
AT1G34210.1	-0.49545	-0.040068	-0.609336	-0.0643954	0.00218489	0.897617	0.00310904	0.916441	somatic embryogenesis receptor-like kinase 2	-	-	-	-	1	1
AT2G23610.1	2.35499	1.58712	-0.0240434	0.0932494	9.95749e-35	4.67386e-16	0.974085	0.916411	methyl esterase 3	-	1	-	-	-	1
AT5G65170.1	-0.574074	-1.67794	-0.280158	-0.152334	0.0445563	1.45281e-09	0.743783	0.916198	VQ motif-containing protein	-	-	1	-	-	1
AT4G18890.1	-0.897397	0.285984	-0.395605	0.122126	5.57898e-06	0.249604	0.483064	0.916198	BES1/BZR1 homolog 3	-	1	-	-	-	1
AT4G19370.1	-2.75574	-3.96764	-1.13289	-0.544412	0.000449181	5.1278e-07	0.696409	0.915908	Protein of unknown function (DUF1218)	-	-	-	-	1	1
AT3G52500.1	-0.787678	-0.518504	-0.114214	-0.0645681	5.69609e-09	0.000341096	0.751681	0.91566	Eukaryotic aspartyl protease family protein	-	1	-	-	-	1
AT1G05600.1	-0.797675	-0.36725	-0.216616	-0.0993495	0.0138404	0.364084	0.679123	0.915495	Tetratricopeptide repeat (TPR)-like superfamily protein	-	1	-	-	-	1
AT2G24400.1	0.308189	0.906748	0.118448	0.353977	0.45929	0.0201208	0.964201	0.915255	SAUR-like auxin-responsive protein family	1	-	-	-	-	1
AT2G04842.1	-0.515202	0.239202	-0.0497785	-0.0716374	0.00227644	0.252246	0.919506	0.915255	threonyl-tRNA synthetase, putative / threonine--tRNA ligase, putative	-	-	-	1	-	1
AT2G16920.1	0.338818	0.0568626	-0.0776377	-0.0537042	0.0017691	0.769094	0.80639	0.915255	ubiquitin-conjugating enzyme 23	-	1	-	-	-	1
AT3G07290.1	-0.928299	0.172954	-1.01562	-0.144515	0.00971805	0.775585	0.0570651	0.915255	Pentatricopeptide repeat (PPR) superfamily protein	-	1	-	-	-	1
AT5G07390.1	-0.531662	-1.63255	-0.764286	-0.739432	0.219197	3.53778e-05	0.87141	0.914926	respiratory burst oxidase homolog A	-	-	1	-	-	1
AT4G36770.1	1.49796	0.427396	-0.125338	0.281496	0.00664095	0.642125	0.953105	0.914401	UDP-Glycosyltransferase superfamily protein	-	-	1	-	-	1
AT4G12470.1	-2.28993	-1.60785	-0.279216	-0.59705	0.0371265	0.24073	0.948302	0.914401	azelaic acid induced 1	-	-	1	-	-	1
AT3G11900.1	0.874101	0.199415	0.313554	0.125855	5.07341e-05	0.558301	0.606416	0.913693	aromatic and neutral transporter 1	-	1	-	-	-	1
AT2G16430.2	1.35258	0.67802	0.269017	-0.150189	7.93715e-09	0.0110743	0.74013	0.91265	purple acid phosphatase 10	1	-	-	-	-	1
AT1G64770.3	-3.54202	-0.32845	-0.155445	-0.10668	0.0122647	0.888164	0.801664	0.912551	NDH-dependent cyclic electron flow 1	-	-	-	-	1	1
AT1G24610.1	-0.304722	0.0073351	-0.0554989	-0.0671583	0.0239288	0.981309	0.899378	0.912324	Rubisco methyltransferase family protein	-	-	-	1	-	1
AT3G59780.1	-1.17023	-0.187366	0.133531	0.0878678	4.14123e-08	0.559363	0.789647	0.912196	Rhodanese/Cell cycle control phosphatase superfamily protein	-	1	-	-	-	1
AT5G42000.1	1.06997	0.0601773	0.800779	0.0635221	1.67153e-12	0.848957	6.61632e-06	0.912196	ORMDL family protein	-	-	1	-	-	1
AT1G04360.1	2.24242	0.360328	1.01414	-0.142166	5.98234e-11	0.508562	0.0188785	0.911922	RING/U-box superfamily protein	-	-	1	-	-	1
AT1G17345.1	0.798882	1.96164	0.113799	0.289035	0.317835	0.00802094	0.955713	0.911622	SAUR-like auxin-responsive protein family	-	1	-	-	-	1
AT5G45360.1	0.379075	0.0269205	0.118377	0.0622215	6.59325e-05	0.888229	0.715238	0.911622	F-box family protein	-	-	1	-	-	1
AT3G10260.3	-0.0702296	0.25295	0.481041	0.0677579	0.823207	0.420954	0.0268032	0.911622	Reticulon family protein	-	-	-	1	-	1
AT3G52400.1	-1.56398	-2.30642	-0.226308	-0.473967	0.000377598	1.27057e-07	0.946467	0.911497	syntaxin of plants 122	-	1	-	-	-	1
AT4G23530.1	-0.436963	-0.0710666	-0.38873	-0.0806123	0.00550607	0.793186	0.189036	0.911497	Protein of unknown function (DUF793)	-	-	1	-	-	1
AT1G20980.1	0.305524	0.00184372	0.130496	0.0635538	0.00035725	0.992862	0.683268	0.911205	squamosa promoter binding protein-like 14	-	-	-	-	1	1
AT1G78955.1	-0.215726	-1.25685	-0.470117	-0.570309	0.76791	0.0335353	0.896708	0.911006	camelliol C synthase 1	1	-	-	-	-	1
AT5G54270.1	-3.20843	1.05557	0.196303	0.101731	4.51132e-05	0.324274	0.705179	0.910805	light-harvesting chlorophyll B-binding protein 3	-	1	-	-	-	1
AT2G28250.1	-1.0794	-1.6097	-0.194943	-0.0931298	0.00170621	2.52902e-06	0.679701	0.909919	Protein kinase superfamily protein	1	-	-	-	-	1
AT3G16490.1	-1.26023	-0.0378996	-0.00944246	0.139557	5.5327e-08	0.938452	0.992398	0.909849	IQ-domain 26	-	-	-	1	-	1
AT1G68765.1	7.19259	4.05715	1.09549	-0.7015	1.3127e-07	2.81093e-09	0.779393	0.909254	Putative membrane lipoprotein	-	1	-	-	-	1
AT2G02790.1	-0.538962	-0.115616	-0.409034	0.0719183	6.48205e-05	0.583239	0.0963333	0.909254	IQ-domain 29	-	-	1	-	-	1
AT5G38660.2	-0.488455	-0.177192	0.114978	-0.0879315	0.0283669	0.572598	0.820667	0.909247	acclimation of photosynthesis to environment	-	1	-	-	-	1
AT1G48110.1	0.418857	0.261361	0.0694201	-0.0640609	1.78161e-07	0.00266707	0.854989	0.90921	evolutionarily conserved C-terminal region 7	-	-	-	1	-	1
AT5G55200.1	0.393745	0.0979398	0.340228	0.0830038	0.0308003	0.752608	0.274229	0.909183	Co-chaperone GrpE family protein	-	-	-	1	-	1
AT4G36960.1	0.853964	0.353074	0.331453	-0.059075	2.33719e-14	0.00558217	0.0938915	0.908796	RNA-binding (RRM/RBD/RNP motifs) family protein	-	1	-	-	-	1
AT5G56040.2	-0.556869	-0.453711	-0.76207	-0.101755	0.000153419	0.00432304	0.0168935	0.908794	Leucine-rich receptor-like protein kinase family protein	-	-	1	-	-	1
AT5G48340.1	0.542951	-0.0559412	0.0159191	-0.0868095	0.000310369	0.846194	0.978308	0.90875		-	-	-	-	1	1
AT2G30870.1	-0.351545	-0.433064	-0.257698	-0.149737	0.0161442	0.00436716	0.741606	0.908447	glutathione S-transferase PHI 10	-	1	-	-	-	1
AT3G05710.2	0.408241	0.0701903	-0.100481	-0.065955	0.00406799	0.777551	0.778254	0.907733	syntaxin of plants 43	-	1	-	-	-	1
AT5G57990.1	-0.223791	0.249082	-0.678137	0.0519035	0.12749	0.12957	1.54741e-06	0.907486	ubiquitin-specific protease 23	-	-	1	-	-	1
AT4G10955.1	1.59302	0.10785	0.287468	-0.10188	5.8578e-18	0.767453	0.50395	0.907125	alpha/beta-Hydrolases superfamily protein	-	-	-	-	1	1
AT1G49780.1	-0.478199	-0.0443838	0.0915098	0.0807878	0.00619694	0.892574	0.844373	0.907071	plant U-box 26	-	-	1	-	-	1
AT1G17520.2	0.516041	-0.0353271	-0.1894	0.0915862	0.00198237	0.922317	0.665007	0.906878		1	-	-	-	-	1
AT1G76490.1	1.26488	0.373679	0.256251	0.106781	2.37096e-06	0.319714	0.598703	0.906753	hydroxy methylglutaryl CoA reductase 1	-	-	1	-	-	1
AT5G07100.1	-0.338181	-0.811973	-0.119848	-0.382332	0.172285	0.000432176	0.965496	0.906334	WRKY DNA-binding protein 26	-	-	-	-	1	1
AT5G66750.1	-0.77796	-0.0438347	-0.482376	-0.129564	0.000238313	0.924619	0.331539	0.906334	chromatin remodeling 1	1	-	-	-	-	1
AT3G52230.1	0.914426	0.127067	0.289535	0.0631162	2.81595e-09	0.623148	0.193226	0.906334		-	1	-	-	-	1
AT2G39810.1	-0.32901	-0.179068	-0.419328	-0.0756181	0.00432818	0.210172	0.0964608	0.906334	ubiquitin-protein ligases	-	-	1	-	-	1
AT5G17540.1	0.711238	-0.095702	0.305305	0.26134	0.0406675	0.891073	0.842538	0.906176	HXXXD-type acyl-transferase family protein	-	-	1	-	-	1
AT5G49230.1	-0.388708	0.0645712	0.0582288	-0.064476	0.0230107	0.826846	0.882913	0.906122	Drought-responsive family protein	-	1	-	-	-	1
AT3G08710.1	-0.28112	-0.546726	0.331213	0.128873	0.101558	0.000784679	0.560358	0.905967	thioredoxin H-type 9	-	-	-	1	-	1
AT2G42620.1	0.633262	0.268845	-0.114998	0.0779736	0.0104729	0.440629	0.783966	0.905947	RNI-like superfamily protein	-	-	1	-	-	1
AT2G35860.1	-0.352601	-0.0731388	-0.521823	0.131147	0.00989888	0.756156	0.282609	0.905257	FASCICLIN-like arabinogalactan protein 16 precursor	-	-	1	-	-	1
AT3G07140.1	-0.280491	-0.0702445	-0.239153	0.059692	0.0203238	0.720687	0.283767	0.904854	GPI transamidase component Gpi16 subunit family protein	-	-	-	1	-	1
AT4G07390.1	0.190058	0.238022	0.0541721	0.0590103	0.102435	0.0485256	0.875621	0.904571	Mannose-P-dolichol utilization defect 1 protein	-	1	-	-	-	1
AT5G60410.2	0.233948	-0.0345803	-0.133391	0.0635061	0.00730025	0.831655	0.653407	0.904571	DNA-binding protein with MIZ/SP-RING zinc finger, PHD-finger and SAP domain	1	-	-	-	-	1
AT1G15420.1	-0.627153	0.0650625	-0.879345	-0.0993641	3.26157e-07	0.7615	0.00203914	0.904271		-	1	-	-	-	1
AT1G18690.1	-0.514876	-0.248097	-0.018036	-0.102241	0.00497281	0.295147	0.978308	0.904108	Galactosyl transferase GMA12/MNN10 family protein	-	1	-	-	-	1
AT1G48430.1	-0.874779	-0.308484	-0.216554	0.105609	5.54897e-05	0.288843	0.662994	0.903772	Dihydroxyacetone kinase	-	-	1	-	-	1
AT2G16400.1	-0.15879	0.285063	-0.335608	0.0660162	0.276305	0.0396876	0.128665	0.903202	BEL1-like homeodomain 7	1	-	-	-	-	1
AT1G04870.2	-0.325064	0.0918434	-0.727843	-0.0920383	0.00795234	0.628471	0.00647441	0.903202	protein arginine methyltransferase 10	-	-	-	-	1	1
AT3G06430.1	-1.11637	-0.342828	-0.0268104	-0.103463	4.69063e-12	0.0489439	0.970317	0.903176	Tetratricopeptide repeat (TPR)-like superfamily protein	1	-	-	-	-	1
AT5G09750.1	-3.3632	-1.17633	-1.44652	-0.614207	0.027614	0.534362	0.53909	0.903176	basic helix-loop-helix (bHLH) DNA-binding superfamily protein	-	-	1	-	-	1
AT3G59670.1	-0.770203	0.113047	-1.53828	-0.104081	8.43128e-18	0.353246	2.1359e-08	0.903176		1	-	-	-	-	1
AT4G04890.1	-2.13693	0.158658	-0.594556	-0.0813481	1.61096e-15	0.720482	0.0135437	0.902896	protodermal factor 2	-	-	1	-	-	1
AT5G43470.1	-1.28875	0.17164	0.191951	0.0761578	0.0217047	0.868306	0.557953	0.902828	Disease resistance protein (CC-NBS-LRR class) family	-	-	-	-	1	1
AT1G22410.1	0.912408	0.682402	0.211073	0.199903	0.000235209	0.0132643	0.851864	0.902726	Class-II DAHP synthetase family protein	-	1	-	-	-	1
AT2G15400.1	-1.42848	-0.889263	-0.353324	-0.179281	0.00220064	0.0836884	0.666999	0.901971	DNA-directed RNA polymerase family protein	1	-	-	-	-	1
AT2G36720.1	-0.366423	-0.11088	-0.222871	0.0495716	0.000467135	0.455476	0.188016	0.901555	Acyl-CoA N-acyltransferase with RING/FYVE/PHD-type zinc finger domain	-	-	-	-	1	1
AT2G22125.1	-0.268162	-0.382453	-0.122232	-0.0709527	0.0850234	0.0174436	0.721982	0.901067	binding	-	-	1	-	-	1
AT5G25630.2	0.447689	0.632002	0.0374498	-0.0707118	0.0635125	0.00699943	0.933312	0.900852	Tetratricopeptide repeat (TPR)-like superfamily protein	1	-	-	-	-	1
AT1G11380.1	0.551524	-0.36047	0.360392	-0.158538	0.00938076	0.167886	0.599494	0.900445	PLAC8 family protein	-	1	-	-	-	1
AT5G02370.1	-0.814125	-0.43718	-0.284843	-0.121283	0.00126102	0.155935	0.58181	0.900427	ATP binding microtubule motor family protein	-	-	-	-	1	1
AT4G30790.1	0.858671	0.332038	0.0871759	0.0612997	3.52339e-10	0.0415257	0.781358	0.900236		-	-	1	-	-	1
AT3G12960.1	4.00944	1.28223	5.79032	-0.647576	4.90041e-05	0.366315	0.00273027	0.90004		-	1	-	-	-	1
AT1G75200.1	-0.334674	0.160278	-0.929684	-0.0845783	0.0146406	0.381231	2.55697e-05	0.898236	flavodoxin family protein / radical SAM domain-containing protein	-	1	-	-	-	1
AT4G36150.1	-2.11557	-0.76206	-0.524876	-0.223496	7.63049e-17	0.0023528	0.584065	0.89816	Disease resistance protein (TIR-NBS-LRR class) family	1	-	-	-	-	1
AT5G11580.1	-0.505708	-0.201074	-0.0270534	-0.0861453	0.00845113	0.454795	0.963617	0.897657	Regulator of chromosome condensation (RCC1) family protein	-	-	-	1	-	1
AT2G30395.1	1.07037	0.158012	1.8634	-0.532065	6.01342e-09	0.60464	0.350358	0.897573	ovate family protein 17	-	-	-	1	-	1
AT5G06060.1	-0.391103	0.199342	0.169087	0.0603247	0.0461346	0.427686	0.479756	0.897111	NAD(P)-binding Rossmann-fold superfamily protein	-	-	-	1	-	1
AT4G22860.1	-0.987804	0.0793558	-0.037643	-0.142574	0.00584037	0.912144	0.96818	0.896826	Cell cycle regulated microtubule associated protein	-	-	1	-	-	1
AT1G05620.1	0.338676	0.0957152	-0.0511598	0.0809786	0.00498352	0.610046	0.916146	0.89682	uridine-ribohydrolase 2	-	-	1	-	-	1
AT2G22500.1	2.70683	1.5105	1.36454	0.260087	2.45798e-25	3.42861e-08	0.0917945	0.89682	uncoupling protein 5	-	-	1	-	-	1
AT4G34200.1	-0.521706	-0.12245	-0.594761	-0.142287	0.00102011	0.632648	0.212989	0.89666	D-3-phosphoglycerate dehydrogenase	-	-	-	1	-	1
AT1G68490.1	0.811755	0.499981	-0.119961	0.101558	2.93058e-08	0.0017613	0.823077	0.896647		1	-	-	-	-	1
AT2G29960.1	0.255392	0.225052	0.101996	0.0583914	0.00872994	0.0347254	0.708255	0.896647	cyclophilin 5	-	-	-	-	1	1
AT1G30620.1	1.80701	1.05446	0.635035	0.243364	1.58108e-12	0.000133838	0.517854	0.896647	NAD(P)-binding Rossmann-fold superfamily protein	-	-	1	-	-	1
AT4G27680.1	0.52238	0.26854	0.240691	-0.0764255	1.83289e-07	0.0185434	0.398268	0.896647	P-loop containing nucleoside triphosphate hydrolases superfamily protein	-	1	-	-	-	1
AT4G38060.2	2.21482	0.808172	0.815338	0.118585	6.86358e-27	0.000433758	0.0164243	0.896647		-	1	-	-	-	1
AT1G63450.1	0.21167	-0.586012	-0.580561	-0.483464	0.446526	0.0228782	0.807963	0.896465	root hair specific 8	-	-	1	-	-	1
AT1G78210.1	1.68628	0.395653	0.833583	0.0905164	1.40255e-12	0.223073	0.000410336	0.896234	alpha/beta-Hydrolases superfamily protein	-	-	1	-	-	1
AT3G02150.2	2.90461	1.65995	0.511474	0.136116	5.28282e-06	0.0255433	0.274058	0.896167	plastid transcription factor 1	-	1	-	-	-	1
AT1G54270.1	0.811728	0.542025	-0.00775112	-0.0516097	8.87527e-10	0.000137439	0.981085	0.895885	eif4a-2	1	-	-	-	-	1
AT1G20630.1	2.21238	1.73796	0.709165	0.0920067	7.98042e-08	6.45646e-05	0.00467114	0.89533	catalase 1	-	-	-	1	-	1
AT3G08960.1	-0.132611	-0.136895	-0.356991	0.05963	0.11599	0.143736	0.040638	0.894743	ARM repeat superfamily protein	-	1	-	-	-	1
AT1G30960.1	-0.779306	-0.0972103	-1.36749	-0.170675	0.00281534	0.838311	0.00357409	0.894743	GTP-binding family protein	-	-	-	-	1	1
AT1G33360.1	0.504847	0.249936	-0.0782815	-0.119199	5.63779e-05	0.100665	0.910002	0.894129	ATP-dependent Clp protease	-	1	-	-	-	1
AT5G53750.1	-0.879719	0.233162	0.48509	0.161629	0.00159682	0.585106	0.402332	0.894129	CBS domain-containing protein	-	-	-	1	-	1
AT1G19440.1	0.448667	0.201191	0.114195	-0.076441	0.000234564	0.197906	0.751965	0.894122	3-ketoacyl-CoA synthase 4	-	1	-	-	-	1
AT1G72410.1	-0.0547106	-0.532241	-0.251131	-0.0827342	0.817948	0.00272416	0.412348	0.894072	COP1-interacting protein-related	1	-	-	-	-	1
AT3G54910.1	-1.07784	-0.496174	-0.488303	-0.129597	0.00571335	0.289857	0.27273	0.893734	RNI-like superfamily protein	-	-	-	-	1	1
AT2G42730.1	-1.5889	-0.317684	-1.16365	0.255671	0.00508428	0.668955	0.257008	0.892948	F-box family protein	1	-	-	-	-	1
AT4G28706.4	-0.422615	-0.216092	0.115234	-0.0684599	0.00214695	0.192127	0.70525	0.891774	pfkB-like carbohydrate kinase family protein	1	-	-	-	-	1
AT1G70260.1	-4.74689	-0.0420574	-0.342765	-0.65722	0.00779511	0.990019	0.931842	0.891543	nodulin MtN21 /EamA-like transporter family protein	-	-	1	-	-	1
AT5G24760.1	0.584881	-0.020266	0.227836	0.236311	0.00140002	0.961878	0.854682	0.891504	GroES-like zinc-binding dehydrogenase family protein	-	-	1	-	-	1
AT5G67380.1	0.272541	-0.262336	0.152464	0.073436	0.044283	0.0829341	0.62096	0.891504	casein kinase alpha 1	-	-	-	-	1	1
AT4G12700.1	1.21133	0.505438	0.174622	-0.0757456	2.22458e-08	0.0526838	0.556946	0.891504		-	1	-	-	-	1
AT4G05320.2	0.835824	0.145671	0.321748	0.114466	1.06826e-07	0.567886	0.450527	0.891504	polyubiquitin 10	-	1	-	-	-	1
AT1G20930.1	-0.699707	0.0386523	-0.0296025	-0.131949	0.00454264	0.942748	0.972123	0.891366	cyclin-dependent kinase B2;2	-	1	-	-	-	1
AT1G05590.1	-0.680476	-0.312597	-0.17751	-0.0846782	0.000169968	0.163501	0.609377	0.891079	beta-hexosaminidase 2	-	-	1	-	-	1
AT4G12005.1	2.62722	2.84574	1.34398	0.820234	0.00660546	0.0238975	0.717036	0.890835		-	1	-	-	-	1
AT2G34500.1	2.79817	0.257222	1.74835	-0.552644	2.99737e-39	0.446052	0.368848	0.890835	cytochrome P450, family 710, subfamily A, polypeptide 1	-	-	1	-	-	1
AT4G31510.1	0.183758	-0.802362	0.347393	0.124243	0.564461	0.00182747	0.451735	0.890659		-	1	-	-	-	1
AT3G22930.1	1.3997	0.0920407	0.863937	-0.219509	0.000478183	0.915362	0.190957	0.890659	calmodulin-like 11	1	-	-	-	-	1
AT3G20240.1	-0.589697	0.599296	-0.738952	-0.140941	0.00135754	0.000646522	0.0787961	0.890659	Mitochondrial substrate carrier family protein	-	-	-	1	-	1
AT5G59740.1	-0.658745	0.115896	-0.424272	0.292799	0.00475962	0.766134	0.765363	0.890486	UDP-N-acetylglucosamine (UAA) transporter family	-	1	-	-	-	1
AT1G66600.1	-2.6184	-6.11225	-4.91897	-1.84668	0.306891	0.0334252	0.499684	0.890427	ABA overly sensitive mutant 3	-	-	-	1	-	1
AT1G75840.1	0.858298	0.181472	0.113218	-0.0846499	7.61882e-26	0.076848	0.780777	0.890242	RAC-like GTP binding protein 5	-	-	-	-	1	1
AT3G28640.1	-0.830224	-0.236316	-0.218608	-0.204234	0.0254986	0.674323	0.834486	0.890183	Tetratricopeptide repeat (TPR)-like superfamily protein	-	-	-	-	1	1
AT1G69830.1	-0.27478	0.433662	0.111547	0.160861	0.0176076	7.51878e-05	0.901382	0.889995	alpha-amylase-like 3	-	1	-	-	-	1
AT5G16770.1	1.84632	-0.57199	2.46242	0.363699	1.15126e-10	0.1241	0.00843956	0.888828	myb domain protein 9	1	-	-	-	-	1
AT1G79090.1	0.494756	0.218262	-0.124158	0.0854058	1.61982e-08	0.0338851	0.751678	0.888412		1	-	-	-	-	1
AT4G12070.1	1.08032	0.719503	0.453147	0.174665	5.52362e-07	0.00197627	0.489286	0.888295		-	-	1	-	-	1
AT1G19710.1	-0.309165	-0.143882	0.125622	-0.086413	0.0161442	0.395534	0.757219	0.887769	UDP-Glycosyltransferase superfamily protein	-	1	-	-	-	1
AT1G02120.1	-0.611712	-0.382362	-0.233431	0.114722	4.0427e-09	0.000524567	0.617951	0.887769	GRAM domain family protein	-	-	-	1	-	1
AT4G26620.1	-0.458199	-0.149138	-0.0918858	0.0966324	5.0939e-05	0.309464	0.853618	0.887664	Sucrase/ferredoxin-like family protein	-	-	1	-	-	1
AT5G24970.2	0.431077	0.236146	-0.055276	-0.115489	0.0138689	0.282889	0.933001	0.887548	Protein kinase superfamily protein	-	1	-	-	-	1
AT1G35255.1	1.16924	0.410025	0.304232	-0.481383	0.00499197	0.497223	0.902528	0.887548		1	-	-	-	-	1
AT4G02180.1	-1.41543	-1.00413	-0.299599	-0.360251	1.41533e-05	0.00388614	0.867211	0.887517	DC1 domain-containing protein	-	-	1	-	-	1
AT2G34050.1	-0.650363	-0.111708	-0.140367	-0.145016	0.000321409	0.703316	0.85137	0.886755		1	-	-	-	-	1
AT4G22540.1	0.454669	0.141767	0.0973183	0.095777	2.04041e-05	0.334822	0.839152	0.886689	OSBP(oxysterol binding protein)-related protein 2A	-	1	-	-	-	1
AT3G49750.1	-0.962625	-0.0122925	-0.317147	-0.169126	2.0543e-08	0.975587	0.657493	0.886689	receptor like protein 44	1	-	-	-	-	1
AT5G15400.1	0.27781	0.306924	0.0878648	0.0581415	0.0114752	0.00766619	0.733432	0.88644	U-box domain-containing protein	-	-	1	-	-	1
AT3G57650.1	0.41804	0.0384614	-0.126526	0.0600744	0.00329319	0.895019	0.59268	0.886336	lysophosphatidyl acyltransferase 2	-	-	-	-	1	1
AT1G56300.1	1.78772	1.53487	0.265385	0.252467	2.61993e-11	2.56149e-08	0.832379	0.885872	Chaperone DnaJ-domain superfamily protein	-	-	1	-	-	1
AT1G48280.1	0.27778	0.618023	0.406676	0.158953	0.189409	0.000906418	0.483895	0.885809	hydroxyproline-rich glycoprotein family protein	-	-	1	-	-	1
AT2G17370.1	0.386352	-0.0671695	0.198794	-0.105051	0.00929894	0.804307	0.640838	0.885618	3-hydroxy-3-methylglutaryl-CoA reductase 2	1	-	-	-	-	1
AT2G46900.1	0.220203	-0.355562	0.271434	0.0766393	0.207065	0.0459573	0.271601	0.885253		-	-	-	1	-	1
AT2G43060.1	0.814586	0.231444	-0.25732	-0.142667	0.000330412	0.502046	0.666474	0.884899	ILI1 binding bHLH 1	-	-	-	1	-	1
AT2G20750.1	-1.01434	-1.17985	0.0377782	0.188996	0.000199957	2.9061e-05	0.974497	0.884411	expansin B1	-	-	-	1	-	1
AT5G25265.1	0.0654781	-0.279116	0.0827325	-0.132639	0.547529	0.00203133	0.909495	0.884336		-	-	1	-	-	1
AT1G52905.1	-0.433773	0.171244	-0.322189	0.123759	0.047141	0.565224	0.478378	0.884336		1	-	-	-	-	1
AT1G15820.1	-1.83159	0.520725	0.157138	-0.10614	0.000888059	0.530996	0.736623	0.8843	light harvesting complex photosystem II subunit 6	-	1	-	-	-	1
AT3G22430.1	0.676562	0.160409	0.239811	0.0965863	5.10437e-05	0.538298	0.490166	0.884283		-	-	-	-	1	1
AT5G24430.1	-0.256497	-0.116829	0.148262	0.14099	0.0493439	0.518062	0.830316	0.884051	Calcium-dependent protein kinase (CDPK) family protein	-	-	1	-	-	1
AT1G67490.1	-0.555623	-0.116339	-0.250295	-0.0831513	5.99002e-06	0.535624	0.374733	0.884051	glucosidase 1	-	-	1	-	-	1
AT1G64430.1	-0.508903	-0.40306	0.0527433	-0.0703204	0.00548228	0.0414927	0.886976	0.883613	Pentatricopeptide repeat (PPR) superfamily protein	-	-	-	1	-	1
AT5G37130.1	-0.128371	0.0601808	-0.534613	-0.0735666	0.294708	0.73884	0.00387356	0.88302	Protein prenylyltransferase superfamily protein	-	-	1	-	-	1
AT2G17787.1	0.787028	-0.250072	0.00727498	0.101246	0.00022181	0.412621	0.989828	0.881432		-	-	-	1	-	1
AT1G21170.2	0.234086	0.00768784	0.10534	-0.0691571	0.0351722	0.976089	0.717767	0.881432		-	-	1	-	-	1
AT3G58570.1	0.537475	0.352871	0.0809518	0.139101	2.68627e-06	0.00457541	0.913943	0.881409	P-loop containing nucleoside triphosphate hydrolases superfamily protein	-	-	1	-	-	1
AT2G23690.1	-1.61647	-1.51228	-0.158785	0.187671	0.000489142	0.00318403	0.864485	0.880817		-	-	1	-	-	1
AT3G47400.1	0.615798	0.27901	0.25717	0.201218	0.011532	0.402398	0.770733	0.880817	Plant invertase/pectin methylesterase inhibitor superfamily	-	-	1	-	-	1
AT5G66570.1	-1.25263	0.4139	0.13901	0.0828662	0.0189065	0.615171	0.681394	0.880376	PS II oxygen-evolving complex 1	-	1	-	-	-	1
AT5G17020.1	-0.112147	0.141523	-0.281005	-0.0485172	0.445805	0.409636	0.0274732	0.880376	exportin 1A	-	-	-	1	-	1
AT5G62700.1	-0.231058	-0.0909893	-0.211031	-0.0965752	0.0227945	0.545074	0.55751	0.880308	tubulin beta chain 3	-	-	-	1	-	1
AT1G19397.1	0.873507	0.250197	0.0365229	0.226362	0.000922728	0.524266	0.978096	0.880006		1	-	-	-	-	1
AT1G13160.1	-0.491641	0.217087	-0.885683	-0.0952969	0.00180827	0.298867	7.10537e-05	0.879789	ARM repeat superfamily protein	-	-	-	-	1	1
AT5G01170.1	-0.748192	0.0265611	-0.788237	-0.0863473	0.000187161	0.952083	0.000162716	0.879451	Protein of unknown function (DUF740)	-	1	-	-	-	1
AT1G65370.1	-0.471026	-0.228065	-0.367678	-0.0869143	0.0171773	0.363987	0.163579	0.879436	TRAF-like family protein	-	-	1	-	-	1
AT3G47040.2	1.1044	0.0777847	3.43171	-1.67382	1.81706e-08	0.845738	0.558443	0.879201	Glycosyl hydrolase family protein	-	1	-	-	-	1
AT3G51250.1	0.833055	0.173917	0.491577	0.0846376	3.26156e-11	0.335396	0.0238894	0.879119	Senescence/dehydration-associated protein-related	-	1	-	-	-	1
AT5G07810.1	-0.459469	0.0831369	-0.0947582	-0.150792	0.0184335	0.804984	0.90459	0.87911	SNF2 domain-containing protein / helicase domain-containing protein / HNH endonuclease domain-containing protein	-	1	-	-	-	1
AT1G30210.1	-1.04056	-0.555127	-0.228955	-0.10909	0.0143415	0.299964	0.57766	0.87911	TEOSINTE BRANCHED 1, cycloidea, and PCF family 24	-	-	-	-	1	1
AT4G26540.1	-0.442349	-0.179118	-0.603601	-0.163579	0.00416827	0.400538	0.221694	0.878626	Leucine-rich repeat receptor-like protein kinase family protein	-	-	1	-	-	1
AT3G18990.2	-0.447428	-0.188618	-0.259199	0.0699622	4.70661e-05	0.168996	0.218287	0.877771		-	-	-	-	1	1
AT4G10360.1	0.0120367	-0.558396	0.340029	-0.0865274	0.956954	2.59248e-06	0.179841	0.877771	TRAM, LAG1 and CLN8 (TLC) lipid-sensing domain containing protein	-	-	-	-	1	1
AT5G60930.2	-0.926028	-0.051212	-0.17705	-0.121469	2.61781e-06	0.902572	0.729099	0.877458		-	-	-	1	-	1
AT1G62040.1	0.564845	0.16092	0.530735	0.10815	0.00854226	0.625644	0.0743244	0.87734	Ubiquitin-like superfamily protein	-	-	-	1	-	1
AT2G45300.1	0.860524	0.0716698	-0.0247398	-0.207989	1.08439e-05	0.858023	0.983166	0.876355	RNA 3'-terminal phosphate cyclase/enolpyruvate transferase, alpha/beta	-	1	-	-	-	1
AT3G16390.1	-0.0881001	-1.20197	-0.0194037	-0.348846	0.904102	0.0216278	0.991681	0.87623	nitrile specifier protein 3	-	-	-	-	1	1
AT4G31010.2	-0.498969	-0.345256	-0.250221	-0.100175	0.0133851	0.117275	0.463529	0.87623	RNA-binding CRS1 / YhbY (CRM) domain-containing protein	-	1	-	-	-	1
AT2G04100.1	0.767126	0.447966	0.92004	0.237723	0.0299019	0.330625	0.188119	0.87623	MATE efflux family protein	-	1	-	-	-	1
AT5G41740.2	-1.30025	-3.32369	0.0585424	-0.277603	0.147093	0.000149601	0.971633	0.876118	Disease resistance protein (TIR-NBS-LRR class) family	-	1	-	-	-	1
AT5G01780.2	-0.851145	-0.132477	-0.0424184	0.104186	0.00153259	0.762079	0.942394	0.875687	2-oxoglutarate-dependent dioxygenase family protein	-	-	1	-	-	1
AT1G53130.1	1.12459	1.95659	1.27836	-1.08175	0.0252186	7.35311e-05	0.768786	0.875687	Stigma-specific Stig1 family protein	1	-	-	-	-	1
AT2G36200.2	-0.467295	0.173212	-0.12317	-0.129287	0.00418144	0.450542	0.839625	0.875377	P-loop containing nucleoside triphosphate hydrolases superfamily protein	-	1	-	-	-	1
AT5G26940.1	0.820009	0.194123	0.241892	-0.0967127	2.40283e-06	0.452588	0.460241	0.875266	Polynucleotidyl transferase, ribonuclease H-like superfamily protein	1	-	-	-	-	1
AT5G24000.1	0.935221	0.539141	0.163048	-0.117558	0.00588582	0.192952	0.739333	0.874721	Protein of unknown function (DUF819)	-	-	1	-	-	1
AT5G11800.1	-0.553088	-0.275582	-0.118166	-0.0789773	0.000125199	0.111776	0.711267	0.874721	K+ efflux antiporter 6	1	-	-	-	-	1
AT3G27180.1	-0.631196	0.0408408	-0.444131	-0.152385	0.00700738	0.932741	0.365407	0.874574	S-adenosyl-L-methionine-dependent methyltransferases superfamily protein	-	-	-	1	-	1
AT4G15400.1	-0.6311	-0.794979	-0.0178147	-0.688113	0.00416406	0.000337063	0.997221	0.873687	HXXXD-type acyl-transferase family protein	-	-	-	-	1	1
AT3G12480.1	0.657191	0.186276	0.1439	-0.0806932	5.0072e-07	0.30968	0.642332	0.873687	nuclear factor Y, subunit C11	-	1	-	-	-	1
AT5G43560.1	0.475918	0.107386	0.0560239	0.0815907	1.42425e-06	0.473063	0.891914	0.873037	TRAF-like superfamily protein	-	-	1	-	-	1
AT1G65520.1	0.771987	0.0757154	0.574502	0.225837	0.000476052	0.865376	0.449159	0.872998	delta(3), delta(2)-enoyl CoA isomerase 1	-	-	1	-	-	1
AT2G15620.1	0.0761546	0.872039	-0.135986	-0.116115	0.78542	1.49529e-05	0.792335	0.87294	nitrite reductase 1	-	-	1	-	-	1
AT5G46115.1	1.0533	0.270679	-0.207863	0.660703	0.0377791	0.740129	0.957538	0.872557		-	-	-	-	1	1
AT1G76880.1	-0.352837	-0.145155	-0.486054	0.0769618	8.01061e-05	0.206253	0.0101779	0.872406	Duplicated homeodomain-like superfamily protein	-	-	-	1	-	1
AT4G25100.1	-0.426709	-0.724066	0.242949	0.120545	0.14555	0.0138354	0.582035	0.872348	Fe superoxide dismutase 1	-	-	1	-	-	1
AT5G14480.1	2.07091	0.0407052	0.00847963	0.126624	2.66214e-14	0.950995	0.98992	0.872308	beta-1,4-N-acetylglucosaminyltransferase family protein	-	1	-	-	-	1
AT1G76540.1	-0.63112	0.311965	-0.112981	-0.129914	0.000320456	0.142131	0.853968	0.872308	cyclin-dependent kinase B2;1	-	1	-	-	-	1
AT1G78290.2	-0.146537	-2.03237	-0.436699	0.291031	0.848352	0.000156494	0.711347	0.872308	Protein kinase superfamily protein	-	-	1	-	-	1
AT1G74960.1	0.282219	-0.132844	-0.0701959	-0.113876	0.0136276	0.395191	0.903156	0.872228	fatty acid biosynthesis 1	-	-	-	-	1	1
AT5G43310.1	-0.36115	0.190553	-0.0602931	0.0691556	0.00296515	0.203057	0.853582	0.872228	COP1-interacting protein-related	-	-	-	-	1	1
AT1G06020.1	-0.225091	2.12494	1.84853	1.23562	0.902183	0.0323598	0.766308	0.872157	pfkB-like carbohydrate kinase family protein	-	-	1	-	-	1
AT4G03510.1	-0.0719352	-0.56388	-0.832693	-0.134938	0.818037	0.0222283	0.0118696	0.871941	RING membrane-anchor 1	-	1	-	-	-	1
AT4G29270.1	-0.269667	0.767757	-0.131386	0.188281	0.114279	5.75677e-07	0.889228	0.871578	HAD superfamily, subfamily IIIB acid phosphatase	-	-	-	-	1	1
AT4G23060.1	-0.813882	-0.383904	-0.233246	0.1153	0.0112007	0.347674	0.576337	0.871578	IQ-domain 22	1	-	-	-	-	1
AT2G42290.1	-1.15141	-0.0989899	-0.252818	0.0893711	3.37142e-10	0.753138	0.37333	0.870809	Leucine-rich repeat protein kinase family protein	-	-	1	-	-	1
AT1G10400.1	-2.81241	-3.28495	-4.91724	-0.918111	1.16985e-25	4.92781e-26	0.0742786	0.870809	UDP-Glycosyltransferase superfamily protein	-	-	1	-	-	1
AT5G05300.1	-1.96252	-4.71982	-0.708195	-0.918723	0.367382	0.0477397	0.871749	0.870687		-	-	-	-	1	1
AT3G63530.1	0.982014	0.350252	0.107106	-0.121143	2.28635e-05	0.255039	0.846601	0.870503	RING/U-box superfamily protein	1	-	-	-	-	1
AT3G12040.1	-0.265344	-1.0941	0.0910192	-0.454255	0.293054	8.98882e-07	0.972161	0.870343	DNA-3-methyladenine glycosylase (MAG)	-	-	-	-	1	1
AT4G30560.1	-0.470753	-0.335413	-0.145026	0.153797	0.0475075	0.250794	0.838418	0.870115	cyclic nucleotide gated channel 9	-	-	-	-	1	1
AT5G24090.1	1.55392	0.605021	1.19029	0.591238	0.000679249	0.336488	0.574859	0.870095	chitinase A	-	-	1	-	-	1
AT2G01150.2	1.1476	0.729572	0.0738784	0.21939	0.00774196	0.166874	0.951278	0.869927		-	-	1	-	-	1
AT4G07410.1	-0.205332	-0.090649	-0.540623	-0.0623757	0.0866569	0.606982	9.37859e-05	0.869927	Transducin family protein / WD-40 repeat family protein	-	-	1	-	-	1
AT4G38630.1	0.606982	0.188191	0.209104	-0.0648539	4.28861e-08	0.202667	0.274058	0.869519	regulatory particle non-ATPase 10	-	-	-	1	-	1
AT1G14185.1	-1.89095	-2.03586	-0.109948	-0.28755	0.000108228	4.56647e-05	0.943854	0.869506	Glucose-methanol-choline (GMC) oxidoreductase family protein	-	-	1	-	-	1
AT2G34670.2	1.04026	0.0419835	-0.0474822	-0.132088	0.000110688	0.948056	0.946637	0.869494	Protein of unknown function (DUF630 and DUF632)	-	-	1	-	-	1
AT1G61380.1	-0.736517	-0.234707	-0.403412	-0.415844	0.00215674	0.488304	0.830352	0.869494	S-domain-1 29	-	-	-	1	-	1
AT1G53025.2	0.735819	-0.390198	0.22347	0.1437	1.09487e-05	0.0528545	0.682598	0.867917		-	1	-	-	-	1
AT3G11200.1	0.325455	0.0592247	0.0873984	-0.0549046	0.00486867	0.771324	0.672782	0.867917	alfin-like 2	-	-	-	-	1	1
AT5G50760.1	-0.0394246	-1.1845	0.223123	0.550537	0.938517	0.000125952	0.938719	0.867894	SAUR-like auxin-responsive protein family	1	-	-	-	-	1
AT5G52290.1	0.767131	1.91785	1.13037	0.371833	0.456949	0.0477502	0.317618	0.867871	shortage in chiasmata 1	-	1	-	-	-	1
AT2G17730.2	1.61827	0.6698	0.16066	-0.187124	9.60687e-09	0.0446342	0.849935	0.8671	NEP-interacting protein 2	-	-	1	-	-	1
AT2G45500.5	0.843402	-0.0209402	0.257982	0.199929	7.41005e-10	0.949732	0.750928	0.86705		-	-	1	-	-	1
AT1G19380.1	-2.61882	-0.81552	0.0644772	-0.336493	0.00183204	0.492653	0.972866	0.866909	Protein of unknown function (DUF1195)	-	1	-	-	-	1
AT1G74210.1	-0.656919	-0.177426	-0.102735	0.151149	0.000105988	0.479029	0.888398	0.866909	PLC-like phosphodiesterases superfamily protein	-	1	-	-	-	1
AT4G31600.1	-0.703409	-0.013914	-0.360261	-0.141803	0.000241608	0.974956	0.433507	0.866909	UDP-N-acetylglucosamine (UAA) transporter family	1	-	-	-	-	1
AT3G54900.1	-0.896931	-0.00837933	-0.292109	-0.113201	1.28939e-05	0.986945	0.415921	0.866909	CAX interacting protein 1	-	-	-	1	-	1
AT5G19390.1	0.37504	0.0468278	0.0748479	0.0941826	0.0303251	0.890986	0.861377	0.86659	Rho GTPase activation protein (RhoGAP) with PH domain	-	1	-	-	-	1
AT1G03160.1	-0.603094	0.0917811	-0.0965032	0.0736507	5.07765e-05	0.703785	0.744937	0.86659	FZO-like	-	-	1	-	-	1
AT5G48970.1	-0.0290771	-0.108297	-0.5166	-0.101077	0.898457	0.64346	0.0395751	0.86659	Mitochondrial substrate carrier family protein	-	-	1	-	-	1
AT2G17510.2	-0.546344	-0.163903	-0.383061	-0.0559546	6.33879e-06	0.321402	0.00270204	0.86659	ribonuclease II family protein	-	1	-	-	-	1
AT5G25060.1	0.384783	0.0365977	-0.0830658	-0.0724027	0.0031379	0.890172	0.784437	0.866566	RNA recognition motif (RRM)-containing protein	1	-	-	-	-	1
AT1G76980.1	1.08205	0.64171	0.384984	0.289767	1.2562e-13	2.72628e-05	0.743376	0.866566		1	-	-	-	-	1
AT2G48140.1	1.92832	-0.432138	2.19648	0.270728	9.14776e-13	0.250511	0.000127376	0.866566	Bifunctional inhibitor/lipid-transfer protein/seed storage 2S albumin superfamily protein	-	1	-	-	-	1
AT5G39340.2	0.805665	0.247139	0.443267	0.144366	6.19223e-10	0.128528	0.304606	0.866522		-	-	-	1	-	1
AT2G44080.1	2.37309	1.1627	-0.305592	-0.225654	0.00011301	0.124551	0.73292	0.866117	ARGOS-like	-	1	-	-	-	1
AT5G66210.1	-0.538611	-0.126629	0.358526	0.110561	0.0166401	0.73677	0.255612	0.866117	calcium-dependent protein kinase 28	-	-	-	1	-	1
AT5G19090.1	-0.406	-0.0905979	-0.361314	-0.100457	0.0250575	0.770471	0.190542	0.866077	Heavy metal transport/detoxification superfamily protein	-	-	1	-	-	1
AT1G51130.1	0.805869	0.195541	0.501583	0.147949	0.000207192	0.561171	0.219467	0.866073	Nse4, component of Smc5/6 DNA repair complex	1	-	-	-	-	1
AT3G56400.1	-0.696289	-3.1232	-0.000716415	0.587025	0.506813	0.000524567	0.999849	0.865733	WRKY DNA-binding protein 70	-	-	1	-	-	1
AT1G73250.1	0.0392497	-0.326937	0.0240655	-0.184023	0.851907	0.0476808	0.980401	0.865643	GDP-4-keto-6-deoxymannose-3,5-epimerase-4-reductase 1	1	-	-	-	-	1
AT4G10340.1	-2.74955	1.07198	0.0842371	-0.119899	0.000260179	0.285196	0.880923	0.865643	light harvesting complex of photosystem II 5	-	1	-	-	-	1
AT5G60630.1	2.07119	0.539913	0.858467	-0.537629	2.25555e-07	0.323423	0.665753	0.865004		-	1	-	-	-	1
AT3G16050.1	-0.554052	0.12912	-0.362618	-0.170551	0.00269654	0.663795	0.527804	0.865004	pyridoxine biosynthesis 1.2	-	1	-	-	-	1
AT3G10380.1	0.76568	0.144812	0.213941	-0.0744229	4.81755e-12	0.376721	0.331372	0.864633	subunit of exocyst complex 8	-	-	1	-	-	1
AT5G01950.7	-0.656783	-0.278415	-0.197064	-0.184651	0.00164442	0.31597	0.80191	0.864557		-	-	-	-	1	1
AT1G08350.2	-0.376786	-0.259208	-0.178747	-0.108231	0.00482722	0.0850455	0.650947	0.864557	Endomembrane protein 70 protein family	-	-	-	-	1	1
AT3G04340.1	-0.668135	-0.0313812	-0.221449	-0.12553	3.11636e-10	0.887699	0.621459	0.864557	FtsH extracellular protease family	-	-	1	-	-	1
AT5G60870.2	-0.436129	0.185167	-0.328956	-0.149059	0.0182876	0.430935	0.496184	0.864557	Regulator of chromosome condensation (RCC1) family protein	1	-	-	-	-	1
AT2G46520.1	-0.47371	0.041232	-0.212241	0.0847462	4.09291e-07	0.815905	0.422677	0.864557	cellular apoptosis susceptibility protein, putative / importin-alpha re-exporter, putative	1	-	-	-	-	1
AT1G17630.1	-0.645035	0.241412	-0.534265	-0.186622	0.022027	0.53285	0.344983	0.864557	Pentatricopeptide repeat (PPR-like) superfamily protein	-	-	1	-	-	1
AT5G50900.1	-0.656728	-0.581337	0.290612	0.0875841	0.000463766	0.00359118	0.240216	0.864557	ARM repeat superfamily protein	-	-	1	-	-	1
AT4G22340.3	0.689272	0.272251	0.347652	0.101545	0.000285255	0.286492	0.207641	0.864557	cytidinediphosphate diacylglycerol synthase 2	-	-	-	-	1	1
AT4G01850.1	0.467938	0.0614299	0.0776512	-0.0828873	9.9774e-09	0.662185	0.829947	0.863422	S-adenosylmethionine synthetase 2	-	-	-	1	-	1
AT5G53140.1	-0.303696	-0.137606	0.103473	0.0522963	0.0020683	0.29185	0.55933	0.863363	Protein phosphatase 2C family protein	-	1	-	-	-	1
AT5G13570.2	0.612487	-0.0242361	0.0872069	0.089462	0.000142665	0.94898	0.820069	0.863016	decapping 2	-	-	1	-	-	1
AT1G13080.1	2.18086	0.563669	0.501124	0.26818	4.59225e-08	0.31597	0.588873	0.862937	cytochrome P450, family 71, subfamily B, polypeptide 2	-	1	-	-	-	1
AT4G34460.1	0.322314	-0.0394224	0.312671	0.086502	0.0017149	0.841018	0.176232	0.862082	GTP binding protein beta 1	-	-	-	1	-	1
AT4G28890.1	0.574307	-0.132256	0.43393	-0.492372	0.00184466	0.660305	0.834499	0.861595	RING/U-box superfamily protein	-	-	-	-	1	1
AT5G36180.1	-0.90961	-1.51435	-3.2199	-1.13966	0.0448173	0.000750908	0.302834	0.861595	serine carboxypeptidase-like 1	1	-	-	-	-	1
AT1G73780.1	0.936419	0.43017	1.25231	0.767955	0.00126741	0.257019	0.59268	0.861554	Bifunctional inhibitor/lipid-transfer protein/seed storage 2S albumin superfamily protein	-	1	-	-	-	1
AT1G48920.1	-0.657672	0.301768	-1.24238	-0.150011	1.47133e-06	0.0663643	8.23239e-05	0.861488	nucleolin like 1	-	-	1	-	-	1
AT1G74040.1	-0.673167	0.120536	-0.42943	-0.109373	3.28096e-09	0.451087	0.126382	0.861474	2-isopropylmalate synthase 1	-	-	-	-	1	1
AT3G25710.1	0.536646	0.663668	-0.117371	0.172781	0.0281234	0.00883241	0.882913	0.861428	basic helix-loop-helix 32	-	-	1	-	-	1
AT4G12440.2	-2.19411	-4.93688	-2.8086	1.81027	0.0342432	8.29614e-05	0.691504	0.861325	adenine phosphoribosyl transferase 4	-	-	-	-	1	1
AT3G56030.1	-1.20323	-0.246082	-1.06736	-0.217236	3.79757e-06	0.522251	0.0443001	0.861248	Tetratricopeptide repeat (TPR)-like superfamily protein	-	-	1	-	-	1
AT3G21230.1	1.42921	1.098	0.339971	0.403194	1.59219e-13	4.28109e-08	0.846934	0.860998	4-coumarate:CoA ligase 5	-	-	1	-	-	1
AT2G25270.1	-0.620884	-0.103882	-0.212334	0.161802	0.00663285	0.792572	0.735002	0.860676		-	1	-	-	-	1
AT2G15390.2	-0.127198	-0.929292	-1.0928	-0.901752	0.728921	0.00091233	0.758924	0.860448	fucosyltransferase 4	-	1	-	-	-	1
AT2G23320.1	1.37724	-0.290169	0.284322	-0.303247	1.04011e-06	0.509016	0.825576	0.860256	WRKY DNA-binding protein 15	-	-	-	1	-	1
AT4G08690.1	-0.262136	-0.344384	0.140216	0.102708	0.0385036	0.00734986	0.72115	0.860256	Sec14p-like phosphatidylinositol transfer family protein	-	-	-	-	1	1
AT3G02890.1	0.92763	0.528553	0.210494	0.0927973	3.40254e-06	0.020229	0.464396	0.860256	RING/FYVE/PHD zinc finger superfamily protein	-	-	1	-	-	1
AT4G22950.1	2.61273	-1.19723	5.33258	1.15393	0.00147101	0.263897	0.100217	0.860256	AGAMOUS-like 19	1	-	-	-	-	1
AT3G48780.1	0.570497	0.0551584	0.478775	0.0958449	5.9447e-05	0.845348	0.0332619	0.860169	serine palmitoyltransferase 1	-	-	1	-	-	1
AT3G55800.1	-3.93241	0.835586	-0.0462045	-0.225182	0.00136907	0.65637	0.968874	0.860136	sedoheptulose-bisphosphatase	-	1	-	-	-	1
AT4G36940.1	-0.18446	0.26315	-0.108325	0.0954665	0.131092	0.027651	0.778254	0.860136	nicotinate phosphoribosyltransferase 1	-	-	-	-	1	1
AT5G56210.1	1.38021	0.131481	0.606705	0.120693	1.18096e-09	0.758703	0.0296334	0.859517	WPP domain interacting protein 2	-	1	-	-	-	1
AT5G43040.1	-1.19039	-0.497041	0.332837	-0.349064	0.000813439	0.296103	0.824644	0.85948	Cysteine/Histidine-rich C1 domain family protein	-	-	1	-	-	1
AT2G22170.1	-0.457395	-0.688787	0.329824	0.197966	0.111051	0.0193266	0.631908	0.85948	Lipase/lipooxygenase, PLAT/LH2 family protein	-	1	-	-	-	1
AT5G42740.1	0.955203	0.270024	0.501369	0.0938731	3.50691e-13	0.107546	0.0191343	0.859413	Sugar isomerase (SIS) family protein	-	1	-	-	-	1
AT1G03960.1	0.0193137	0.533955	-0.193034	0.10283	0.934852	6.00171e-05	0.574565	0.858897	Calcium-binding EF hand family protein	-	1	-	-	-	1
AT2G18570.1	-0.35301	0.0978945	-0.395567	-0.150355	0.0237874	0.688818	0.378406	0.85888	UDP-Glycosyltransferase superfamily protein	-	-	1	-	-	1
AT1G35260.1	-0.0249146	0.849883	-0.607778	0.226554	0.938261	4.62076e-06	0.378036	0.85888	MLP-like protein 165	-	1	-	-	-	1
AT5G64020.1	0.442663	0.419277	0.468253	-0.114621	0.000423663	0.00120318	0.0974398	0.85888	TRICHOME BIREFRINGENCE-LIKE 14	-	1	-	-	-	1
AT4G24610.2	0.471926	0.0283954	0.118286	0.1407	0.00549051	0.940382	0.844087	0.858771		1	-	-	-	-	1
AT4G34419.1	-1.60424	0.155539	-1.0535	0.674572	0.00539991	0.863362	0.704307	0.858771		-	-	-	1	-	1
AT1G12350.1	0.410566	-0.0158126	0.157609	0.114101	0.0358991	0.970348	0.703762	0.858771	4-phospho-panto-thenoylcysteine synthetase	-	-	-	1	-	1
AT5G16830.1	1.49314	0.324193	0.735026	0.115465	2.90259e-26	0.0678798	0.00325605	0.858771	syntaxin of plants 21	-	1	-	-	-	1
AT1G20100.1	0.309633	0.184709	0.00553827	0.0571772	0.00720848	0.193868	0.98484	0.857563		-	1	-	-	-	1
AT2G46030.3	1.067	0.213802	0.523774	0.111384	4.13026e-15	0.249007	0.0462204	0.857563		-	1	-	-	-	1
AT1G16280.1	-0.419244	0.0992441	-0.701895	-0.132847	0.150841	0.846612	0.0206001	0.857563	RNA helicase 36	1	-	-	-	-	1
AT2G17130.1	-0.18913	-0.235033	-0.0629419	-0.240543	0.0827544	0.0409661	0.959759	0.856041	isocitrate dehydrogenase subunit 2	-	-	-	-	1	1
AT2G41230.1	2.71436	1.94648	0.301989	-0.626724	5.34615e-06	0.00296632	0.918061	0.856041		-	1	-	-	-	1
AT1G30420.1	0.0661756	-0.81351	-0.291938	-0.313386	0.884836	0.013845	0.821618	0.856041	multidrug resistance-associated protein 12	-	-	-	1	-	1
AT5G27760.1	1.29527	0.381876	0.390913	-0.240451	0.000129741	0.4453	0.636423	0.856041	Hypoxia-responsive family protein	-	1	-	-	-	1
AT1G53460.1	0.54102	0.26118	-0.0417498	0.13907	0.00370535	0.278155	0.953051	0.85524		1	-	-	-	-	1
AT3G03990.1	1.45088	0.594307	0.149101	-0.0973259	1.19074e-17	0.00178343	0.659822	0.855047	alpha/beta-Hydrolases superfamily protein	-	-	-	-	1	1
AT1G54260.1	0.6999	0.4221	0.214254	-0.218056	0.0075284	0.198852	0.805774	0.854778	winged-helix DNA-binding transcription factor family protein	-	-	-	1	-	1
AT1G68660.1	0.510585	0.467893	0.373284	0.132711	0.0427205	0.0869348	0.31046	0.854665	Ribosomal protein L12/ ATP-dependent Clp protease adaptor protein ClpS family protein	-	-	-	1	-	1
AT1G12360.1	0.445006	-0.101565	0.345622	0.119298	0.000136432	0.584537	0.285325	0.853999	Sec1/munc18-like (SM) proteins superfamily	-	1	-	-	-	1
AT3G54010.1	0.805609	-0.0729104	0.243459	0.0946999	1.27048e-11	0.740752	0.361514	0.853449	FKBP-type peptidyl-prolyl cis-trans isomerase family protein	-	1	-	-	-	1
AT1G79340.1	0.577949	0.269677	0.444213	0.0791663	8.70558e-09	0.0208145	0.00935787	0.853114	metacaspase 4	-	1	-	-	-	1
AT2G41170.2	3.7445	0.0315344	1.78354	-0.205372	4.43839e-19	0.97769	6.23787e-06	0.853036		-	-	1	-	-	1
AT5G13960.1	-0.47921	-0.19593	-0.284986	-0.133971	0.00401499	0.37217	0.474026	0.852228	SU(VAR)3-9 homolog 4	-	-	1	-	-	1
AT5G55050.1	0.454785	0.0558795	-0.0258104	-0.322789	0.0258248	0.888164	0.986243	0.851263	GDSL-like Lipase/Acylhydrolase superfamily protein	-	-	1	-	-	1
AT5G05980.1	0.101224	-0.267461	-0.0499932	0.0827217	0.437119	0.025662	0.891429	0.850169	DHFS-FPGS homolog B	-	-	1	-	-	1
AT1G71000.1	3.5368	7.58706	4.49591	-1.0642	0.0019351	1.16182e-05	0.106124	0.850169	Chaperone DnaJ-domain superfamily protein	-	1	-	-	-	1
AT5G55310.1	0.773609	0.310688	0.140029	0.0745748	1.1259e-19	0.00109097	0.543508	0.849668	DNA topoisomerase 1 beta	1	-	-	-	-	1
AT1G31470.1	1.82894	0.598436	0.77657	-0.23722	2.16498e-14	0.0399476	0.181357	0.849559	Major facilitator superfamily protein	-	1	-	-	-	1
AT1G23000.2	-0.175388	-0.531955	-0.0727411	0.148707	0.510898	0.0216296	0.912151	0.849491		-	-	-	-	1	1
AT3G58780.4	6.58716	0.264531	0.626386	-0.848477	0.000280977	0.931337	0.86122	0.849398		-	1	-	-	-	1
AT2G25610.2	0.352534	0.30083	0.448097	0.0884358	0.00145754	0.00949698	0.0208553	0.849336		-	-	-	1	-	1
AT1G61370.1	-0.19713	-0.53584	-0.254523	-0.458123	0.4847	0.0312356	0.900663	0.849316	S-locus lectin protein kinase family protein	-	1	-	-	-	1
AT5G63960.2	-0.644422	-0.167116	-0.387462	0.118012	0.000102666	0.492746	0.189132	0.849316	DNA binding;nucleotide binding;nucleic acid binding;DNA-directed DNA polymerases;DNA-directed DNA polymerases	-	-	1	-	-	1
AT5G46090.1	0.851304	0.80404	-0.0110066	-0.207989	0.0386616	0.0699876	0.991863	0.848899	Protein of unknown function (DUF679)	-	1	-	-	-	1
AT3G11520.1	-0.868871	-0.0293872	-0.0911681	-0.200069	0.000315507	0.956039	0.919257	0.848431	CYCLIN B1;3	1	-	-	-	-	1
AT1G73180.1	-0.206012	-0.0379584	-0.524512	-0.0889138	0.075913	0.857389	0.00480023	0.848431	Eukaryotic translation initiation factor eIF2A family protein	-	-	-	1	-	1
AT3G22790.1	-0.343512	-0.220828	-0.261504	-0.113984	0.000762275	0.0616138	0.420176	0.848276	Kinase interacting (KIP1-like) family protein	-	-	1	-	-	1
AT5G57015.1	0.465101	0.218502	0.194404	-0.0646443	1.85585e-05	0.0955138	0.23144	0.848276	casein kinase I-like 12	-	-	1	-	-	1
AT1G01110.2	-0.498906	-0.254229	-0.696183	-0.250051	0.00407815	0.245349	0.306283	0.848008	IQ-domain 18	-	-	1	-	-	1
AT3G10110.1	-0.740698	-0.163208	-1.36185	-0.235631	0.00883316	0.722021	0.00633123	0.847886	Mitochondrial import inner membrane translocase subunit Tim17/Tim22/Tim23 family protein	-	1	-	-	-	1
AT2G48020.1	0.688437	0.126488	0.187865	-0.190088	0.00621472	0.777354	0.796407	0.847529	Major facilitator superfamily protein	-	-	1	-	-	1
AT5G07270.1	1.45374	0.369497	0.479158	0.1013	1.55273e-27	0.0217334	0.029193	0.847529	XB3 ortholog 3 in Arabidopsis thaliana	-	1	-	-	-	1
AT2G39950.1	0.604823	0.0335165	0.222501	0.0868716	4.92384e-09	0.878212	0.340419	0.847274		-	1	-	-	-	1
AT1G77380.1	0.403587	1.68085	-0.585596	-0.46828	0.338501	2.75204e-06	0.721982	0.846957	amino acid permease 3	-	-	-	-	1	1
AT4G33240.1	1.74957	0.815142	0.543332	0.124033	4.82434e-50	3.96633e-11	0.0485926	0.845679	1-phosphatidylinositol-4-phosphate 5-kinases;zinc ion binding;1-phosphatidylinositol-3-phosphate 5-kinases	-	-	1	-	-	1
AT2G31380.1	-0.063207	0.192836	-0.993846	-0.220553	0.964978	0.896646	0.0429412	0.845679	salt tolerance homologue	-	-	1	-	-	1
AT2G19710.1	0.861328	0.139554	0.331817	0.140799	4.52503e-08	0.59076	0.393713	0.845489	Regulator of Vps4 activity in the MVB pathway protein	-	-	1	-	-	1
AT4G39330.1	1.68472	1.3869	1.45766	0.11988	4.98152e-05	0.00196996	9.57418e-12	0.84442	cinnamyl alcohol dehydrogenase 9	1	-	-	-	-	1
AT1G22110.1	1.46996	0.215614	0.898429	-0.366482	0.0170527	0.860996	0.367354	0.844213	structural constituent of ribosome	-	-	1	-	-	1
AT4G35320.1	0.6103	0.27268	0.635484	0.197782	0.00191701	0.30375	0.186899	0.844084		1	-	-	-	-	1
AT1G80730.1	-2.26048	0.107506	-1.33741	-0.782061	0.000109854	0.910149	0.616044	0.842839	zinc-finger protein 1	-	-	-	-	1	1
AT4G40000.1	-0.756839	-0.278217	-0.659267	-0.266298	0.000281633	0.297633	0.359739	0.842839	S-adenosyl-L-methionine-dependent methyltransferases superfamily protein	-	-	-	-	1	1
AT3G47010.1	-0.802948	-0.594657	-0.373517	-0.204412	0.0454298	0.215799	0.562523	0.842788	Glycosyl hydrolase family protein	-	1	-	-	-	1
AT3G60110.1	1.55596	0.797522	0.393524	0.193834	3.41067e-14	0.000340099	0.483022	0.842664	DNA-binding bromodomain-containing protein	-	-	1	-	-	1
AT2G21440.1	-0.574281	-0.0482523	-0.990159	-0.130602	0.0244653	0.929301	7.0164e-05	0.842515	RNA-binding (RRM/RBD/RNP motifs) family protein	-	-	-	1	-	1
AT3G52430.1	-1.22254	-1.42429	-0.316815	-0.346705	2.92005e-10	1.42804e-13	0.811676	0.842337	alpha/beta-Hydrolases superfamily protein	-	-	1	-	-	1
AT1G70895.1	-0.811281	-0.289668	0.170277	0.177394	0.00216228	0.394497	0.801702	0.842337	CLAVATA3/ESR-RELATED 17	-	-	-	-	1	1
AT1G21760.1	0.466619	-0.25818	0.274057	0.114773	0.00120293	0.145884	0.387279	0.842264	F-box protein 7	-	-	-	1	-	1
AT3G16210.1	3.18544	1.32959	1.90237	0.872012	5.82907e-40	2.35768e-08	0.382657	0.84224	F-box family protein	-	1	-	-	-	1
AT5G20450.10	-0.920954	-0.0771571	0.250434	-0.197414	0.00762323	0.903122	0.707931	0.841597		-	-	-	-	1	1
AT4G32180.1	0.320219	-0.294159	0.0653924	0.0962261	9.15205e-05	0.000669976	0.864998	0.841073	pantothenate kinase 2	-	-	1	-	-	1
AT1G15460.1	2.77073	1.97029	7.34366	0.779342	6.29645e-15	5.01357e-08	5.40594e-05	0.841073	HCO3- transporter family	-	-	1	-	-	1
AT2G35240.1	-0.392465	-0.141396	-0.672684	-0.169528	0.0113295	0.53523	0.0763265	0.841056	plastid developmental protein DAG, putative	-	-	-	-	1	1
AT3G24430.1	-1.6581	-0.306852	0.0425203	-0.148926	0.000144878	0.652047	0.951486	0.839983	ATP binding	1	-	-	-	-	1
AT5G47110.1	-0.652382	-0.426317	0.057234	0.0953717	0.0140773	0.182829	0.88546	0.839983	Chlorophyll A-B binding family protein	-	1	-	-	-	1
AT5G27610.1	1.38395	0.204503	-0.157963	-0.201101	1.63158e-14	0.47884	0.834622	0.839983	DIRP ;Myb-like DNA-binding domain	-	1	-	-	-	1
AT4G22130.1	-1.02345	-0.380804	-0.389454	-0.106144	3.12403e-06	0.178444	0.109757	0.839983	STRUBBELIG-receptor family 8	-	1	-	-	-	1
AT1G13210.1	-1.34945	-0.806786	-0.155389	-0.292407	3.81701e-07	0.00620736	0.900882	0.839949	autoinhibited Ca2+/ATPase II	-	1	-	-	-	1
AT4G34412.1	-0.509193	-0.263528	-0.045892	-0.126348	0.00258626	0.186432	0.934749	0.839548		-	-	-	-	1	1
AT3G04010.1	1.76132	0.861617	1.32142	0.324109	1.3978e-11	0.00329176	0.0631812	0.839484	O-Glycosyl hydrolases family 17 protein	-	-	-	-	1	1
AT5G51160.1	1.76931	0.74958	2.22514	-0.889839	1.24923e-09	0.0278233	0.343543	0.839251	Ankyrin repeat family protein	-	-	-	1	-	1
AT5G28540.1	-0.323785	0.168339	-0.646364	-0.230509	0.0107623	0.31692	0.262191	0.839251	heat shock protein 70 (Hsp 70) family protein	-	1	-	-	-	1
AT1G15350.1	0.901089	0.0617472	0.812329	-0.153832	1.21809e-12	0.806156	0.00931671	0.839251		-	-	-	1	-	1
AT5G14660.1	-0.866842	0.342367	-0.209337	-0.151098	0.00253946	0.322468	0.66926	0.83877	peptide deformylase 1B	-	-	-	1	-	1
AT3G57280.1	-0.352453	-0.217028	-0.354359	-0.23308	0.0212146	0.259505	0.62762	0.838495	Transmembrane proteins 14C	1	-	-	-	-	1
AT1G55152.1	1.72457	0.795096	0.690039	0.155724	8.54946e-09	0.0210471	0.0346845	0.838495		-	-	-	1	-	1
AT1G26150.1	-1.12767	-0.278211	-0.27272	0.157065	7.31806e-07	0.387828	0.55933	0.837918	proline-rich extensin-like receptor kinase 10	-	-	1	-	-	1
AT1G07300.3	-0.534772	-0.677795	0.363498	0.223844	0.0909629	0.0306892	0.59268	0.83786		1	-	-	-	-	1
AT3G26510.7	-0.0719222	-1.08318	-0.026192	0.138099	0.906205	0.010902	0.968223	0.837645		-	-	1	-	-	1
AT2G46160.1	-1.72452	-0.987161	-0.338207	-0.217293	4.5153e-05	0.0297554	0.615836	0.837645	RING/U-box superfamily protein	-	-	-	-	1	1
AT1G55730.1	0.515436	0.116404	0.753669	0.263846	8.08296e-06	0.506221	0.246314	0.837645	cation exchanger 5	-	1	-	-	-	1
AT1G06380.1	-0.715415	0.114079	-0.949802	-0.167946	0.00026883	0.728383	0.00462952	0.837524	Ribosomal protein L1p/L10e family	-	1	-	-	-	1
AT2G42880.1	-0.0931404	-0.364062	-0.0123887	-0.0847131	0.413411	0.000184038	0.975361	0.836193	MAP kinase 20	1	-	-	-	-	1
AT5G11240.1	-0.850132	0.0187705	-1.29694	-0.173511	1.41091e-07	0.960628	5.53231e-05	0.836027	transducin family protein / WD-40 repeat family protein	-	-	-	1	-	1
AT5G18340.1	-0.443025	-2.97817	-0.052402	0.389222	0.628129	0.000784089	0.977129	0.835556	ARM repeat superfamily protein	-	1	-	-	-	1
AT4G34450.1	0.17528	0.0872178	0.0790357	0.0680904	0.0283784	0.429993	0.73041	0.835556	coatomer gamma-2 subunit, putative / gamma-2 coat protein, putative / gamma-2 COP, putative	-	-	1	-	-	1
AT5G17390.1	0.693704	0.192213	1.51502	1.20763	0.0273387	0.709585	0.704355	0.835556	Adenine nucleotide alpha hydrolases-like superfamily protein	-	1	-	-	-	1
AT5G23810.1	-2.27269	-0.927102	0.329505	0.206602	6.08694e-05	0.196045	0.595172	0.835556	amino acid permease 7	1	-	-	-	-	1
AT2G34930.1	0.284643	0.559879	0.800401	0.181598	0.378567	0.077467	0.0313499	0.835556	disease resistance family protein / LRR family protein	-	1	-	-	-	1
AT4G00850.1	1.01933	0.16605	0.820997	0.135057	0.00101842	0.757827	0.00238225	0.834968	GRF1-interacting factor 3	-	1	-	-	-	1
AT1G03106.1	-4.11059	0.958055	-2.34167	1.5079	0.0327986	0.751072	0.614066	0.834913		1	-	-	-	-	1
AT4G13510.1	-0.511728	-1.0922	-0.255353	-0.536671	0.0661661	4.32586e-05	0.910002	0.834852	ammonium transporter 1;1	-	-	1	-	-	1
AT3G54363.1	1.29671	-0.250496	0.500847	0.42464	0.00238285	0.722021	0.734586	0.834852		-	-	-	1	-	1
AT3G50240.1	-0.447289	-0.103366	-0.228753	-0.206551	0.0120506	0.708779	0.745151	0.834679	ATP binding microtubule motor family protein	-	1	-	-	-	1
AT4G34020.1	-0.956439	-0.389126	-0.225629	-0.156276	5.87787e-06	0.107515	0.642708	0.834509	Class I glutamine amidotransferase-like superfamily protein	-	-	1	-	-	1
AT1G23060.1	1.46948	0.469206	1.14837	-0.467548	2.41556e-07	0.211124	0.352609	0.834173		-	-	-	-	1	1
AT1G17120.1	0.251885	-0.143584	0.601471	0.0956637	0.262989	0.65637	0.000754145	0.833707	cationic amino acid transporter 8	-	1	-	-	-	1
AT1G16610.3	-0.133505	0.236246	-0.441409	-0.0777815	0.298567	0.0653407	0.0030792	0.833498	arginine/serine-rich 45	-	1	-	-	-	1
AT5G17550.1	0.59994	-0.0323442	-0.101449	-0.139585	0.00332573	0.943688	0.849872	0.833315	peroxin 19-2	-	-	1	-	-	1
AT2G38410.1	1.295	0.596403	0.164504	0.117527	3.10963e-18	0.000263082	0.650589	0.833315	ENTH/VHS/GAT family protein	-	-	1	-	-	1
AT5G08560.1	0.778177	-0.000926403	0.284149	0.0730313	2.95584e-08	0.997749	0.0674098	0.833275	transducin family protein / WD-40 repeat family protein	1	-	-	-	-	1
AT5G67160.1	0.629785	0.384904	0.0462608	0.192765	0.0205384	0.255233	0.960191	0.833121	HXXXD-type acyl-transferase family protein	-	1	-	-	-	1
AT2G47800.1	1.42384	1.03536	0.492676	0.279607	2.16343e-08	0.000139671	0.537859	0.832888	multidrug resistance-associated protein 4	-	-	1	-	-	1
AT1G43800.1	1.97114	0.855476	0.0764872	-0.487596	0.00128007	0.292179	0.971744	0.832637	Plant stearoyl-acyl-carrier-protein desaturase family protein	-	-	1	-	-	1
AT2G40110.1	1.122	-0.186403	0.446728	-0.29518	4.82177e-07	0.612121	0.615978	0.831993	Yippee family putative zinc-binding protein	1	-	-	-	-	1
AT2G23430.1	1.93428	-0.0446311	0.301381	0.165384	8.15819e-11	0.949732	0.516564	0.831417	Cyclin-dependent kinase inhibitor family protein	-	1	-	-	-	1
AT3G15450.1	-0.0932564	-1.45891	0.162506	-0.322485	0.902247	0.00506795	0.901708	0.831297	Aluminium induced protein with YGL and LRDR motifs	-	1	-	-	-	1
AT3G46130.1	0.505601	-1.03865	-0.436093	-0.251908	0.327861	0.0408129	0.544142	0.831297	myb domain protein 48	-	-	1	-	-	1
AT5G26622.1	-0.646385	-0.561136	-0.434433	-0.146736	0.0137703	0.0498238	0.202076	0.831297	Beta-galactosidase related protein	-	-	-	-	1	1
AT5G23340.1	0.784888	0.245379	0.111121	-0.168473	1.27518e-05	0.32834	0.861949	0.831078	RNI-like superfamily protein	-	-	-	-	1	1
AT2G36800.1	-1.03347	4.09871	-0.244868	0.245603	0.654223	0.0475317	0.774044	0.831078	don-glucosyltransferase 1	-	-	-	1	-	1
AT4G28440.1	-0.409177	0.0850226	-0.239554	-0.0894986	2.25111e-05	0.558409	0.269398	0.831078	Nucleic acid-binding, OB-fold-like protein	-	1	-	-	-	1
AT1G71850.1	-1.022	0.0483214	-0.951852	-0.195797	6.15608e-09	0.88991	0.0149846	0.831078	Ubiquitin carboxyl-terminal hydrolase family protein	-	-	1	-	-	1
AT4G30150.1	-0.686908	-0.209279	-0.748493	-0.15453	1.6824e-06	0.277659	0.0147969	0.831078		-	-	1	-	-	1
AT3G19515.2	-0.436469	-0.255905	-0.121002	0.10143	0.0163871	0.268486	0.711347	0.830479		-	1	-	-	-	1
AT4G37330.1	1.40185	0.767204	0.408007	0.103571	1.41509e-34	7.97551e-11	0.0615307	0.830479	cytochrome P450, family 81, subfamily D, polypeptide 4	-	1	-	-	-	1
AT5G16860.1	-0.851181	0.0348241	-1.07702	-0.186349	0.000566935	0.947544	0.00353673	0.830479	Tetratricopeptide repeat (TPR)-like superfamily protein	-	-	1	-	-	1
AT5G06100.2	0.514581	0.00804018	0.114127	0.118245	0.0158876	0.987332	0.783455	0.830411	myb domain protein 33	-	-	1	-	-	1
AT2G32320.2	0.37799	0.25983	-0.000814691	0.101532	0.000401415	0.025362	0.999211	0.830388	tRNAHis guanylyltransferase	1	-	-	-	-	1
AT4G30980.2	-0.636475	0.224603	-0.287667	-0.232622	0.00202027	0.442446	0.696451	0.830388		-	-	1	-	-	1
AT5G58780.1	3.86192	1.39458	2.86454	1.09318	2.50637e-28	0.000391783	0.307108	0.830224	Undecaprenyl pyrophosphate synthetase family protein	1	-	-	-	-	1
AT2G38010.2	0.681443	0.720689	-0.185782	0.17113	0.00251808	0.00211846	0.744366	0.830146	Neutral/alkaline non-lysosomal ceramidase	1	-	-	-	-	1
AT3G14220.1	-0.189154	0.335325	-0.197014	-0.0947463	0.252703	0.0352899	0.434925	0.830146	GDSL-like Lipase/Acylhydrolase superfamily protein	-	-	-	-	1	1
AT4G29260.1	-0.0913963	-0.46224	-0.0357594	-0.096399	0.54774	0.000147811	0.930675	0.830133	HAD superfamily, subfamily IIIB acid phosphatase	-	-	-	1	-	1
AT2G38160.3	-1.04093	-0.0520838	-0.555838	-0.285108	0.0117979	0.952878	0.46782	0.830107		-	-	-	1	-	1
AT4G20140.1	0.472772	0.280615	0.204073	-0.199761	0.0239861	0.300822	0.762994	0.829147	Leucine-rich repeat transmembrane protein kinase	-	-	-	1	-	1
AT5G66480.1	-1.47892	-1.2667	0.382531	0.562522	0.000554195	0.00427282	0.856632	0.828799		-	1	-	-	-	1
AT4G35230.1	0.332409	0.177334	0.0722128	-0.096983	0.0265614	0.372959	0.839741	0.828577	BR-signaling kinase 1	-	-	1	-	-	1
AT5G42470.1	0.323875	-0.0917188	0.254229	0.101001	0.0317888	0.701029	0.301154	0.828577		-	-	-	1	-	1
AT1G06820.1	0.413927	-0.00191132	0.0895679	-0.0754546	0.000235209	0.994044	0.706781	0.828165	carotenoid isomerase	-	-	-	-	1	1
AT4G17800.1	-0.620796	-0.541942	-0.583938	-0.355694	0.00266376	0.0160124	0.563708	0.828072	Predicted AT-hook DNA-binding family protein	-	-	1	-	-	1
AT1G29900.1	-0.376452	-0.0448106	-0.600941	0.147623	0.00562577	0.867919	0.0461164	0.827949	carbamoyl phosphate synthetase B	-	-	1	-	-	1
AT1G77370.2	0.336305	0.0410787	0.490083	0.193633	0.0198837	0.88399	0.29132	0.826271		-	1	-	-	-	1
AT5G46600.1	2.8681	1.64867	0.200479	0.610541	2.28617e-08	0.00351833	0.937728	0.826193	Aluminium activated malate transporter family protein	-	-	1	-	-	1
AT1G71810.1	1.21742	0.0477003	0.0705732	0.109102	2.81708e-16	0.884183	0.86073	0.825471	Protein kinase superfamily protein	-	-	1	-	-	1
AT2G25710.1	1.57401	0.00256512	0.235989	0.10808	8.84438e-40	0.993416	0.36906	0.825471	holocarboxylase synthase 1	-	-	-	1	-	1
AT1G17340.1	1.2946	0.230524	0.375085	-0.11548	3.58522e-12	0.411565	0.130497	0.825317	Phosphoinositide phosphatase family protein	-	-	-	-	1	1
AT1G59870.1	-2.37159	-1.43505	-0.730638	-0.436884	0.00222833	0.127602	0.547758	0.825315	ABC-2 and Plant PDR ABC-type transporter family protein	-	-	1	-	-	1
AT1G53030.1	0.6931	-0.404383	0.357623	0.274505	0.0159713	0.269238	0.669703	0.824028	Cytochrome C oxidase copper chaperone (COX17)	-	-	-	1	-	1
AT3G66654.1	0.462952	-0.104697	0.27747	-0.122291	0.000310931	0.610646	0.356864	0.824028	Cyclophilin-like peptidyl-prolyl cis-trans isomerase family protein	-	-	-	-	1	1
AT5G14930.2	-1.79107	-1.67342	0.355875	0.239653	1.76321e-17	2.70232e-16	0.605952	0.823026	senescence-associated gene 101	1	-	-	-	-	1
AT5G26830.1	-0.229971	0.105198	-0.263749	-0.0904751	0.0493935	0.531124	0.189669	0.823026	Threonyl-tRNA synthetase	-	-	-	-	1	1
AT1G52780.1	-0.593922	-0.231674	0.269991	0.275551	8.25043e-05	0.235589	0.769092	0.822736	Protein of unknown function (DUF2921)	-	-	-	1	-	1
AT4G30210.3	1.48145	-0.0164877	0.626215	0.191467	9.53104e-10	0.979228	0.125596	0.822736		1	-	-	-	-	1
AT1G12110.1	1.61046	0.952036	-0.228248	-0.200418	1.28541e-10	0.000486894	0.716243	0.822625	nitrate transporter 1.1	-	-	1	-	-	1
AT4G12330.1	1.84985	0.971052	0.931379	-0.484285	2.87354e-14	0.000183967	0.463765	0.821833	cytochrome P450, family 706, subfamily A, polypeptide 7	-	-	1	-	-	1
AT3G11390.1	-1.39005	-1.02518	-0.542425	-0.596332	0.00213766	0.0335676	0.813942	0.821274	Cysteine/Histidine-rich C1 domain family protein	-	-	-	-	1	1
AT5G12330.4	0.687063	1.16353	0.317364	0.230915	0.0112307	8.43906e-06	0.639425	0.820944	Lateral root primordium (LRP) protein-related	-	-	1	-	-	1
AT1G61840.1	-1.60785	-1.23958	-2.12946	-0.864635	5.57093e-06	0.000898018	0.256024	0.820944	Cysteine/Histidine-rich C1 domain family protein	-	-	1	-	-	1
AT1G25460.1	-2.36522	-4.21682	-0.710783	-1.29947	0.0335452	0.000551261	0.896708	0.820744	NAD(P)-binding Rossmann-fold superfamily protein	-	-	-	1	-	1
AT1G11940.1	0.557197	0.490071	0.451623	0.176103	0.00135914	0.005693	0.263037	0.820671	Core-2/I-branching beta-1,6-N-acetylglucosaminyltransferase family protein	-	1	-	-	-	1
AT4G16690.1	5.25558	2.07218	1.01721	0.382379	2.07222e-06	0.0528301	0.240383	0.820419	methyl esterase 16	-	-	-	1	-	1
AT2G41460.1	-0.571225	-0.148079	-0.543152	0.121145	0.0134742	0.673662	0.0227108	0.819867	apurinic endonuclease-redox protein	-	-	-	1	-	1
AT5G16410.1	-2.53631	0.6008	0.761008	-0.458955	0.00233379	0.400671	0.542646	0.819461	HXXXD-type acyl-transferase family protein	-	-	1	-	-	1
AT4G33625.1	0.60564	1.0614	0.367306	0.246747	6.77686e-08	3.40087e-24	0.598263	0.819437		1	-	-	-	-	1
AT1G34220.1	0.55953	0.122167	0.183662	0.103925	1.15402e-06	0.490219	0.503193	0.819194	Regulator of Vps4 activity in the MVB pathway protein	-	-	1	-	-	1
AT3G19300.1	-0.472998	0.392641	-1.05462	0.221408	0.034871	0.0872407	0.0144418	0.819194	Protein kinase superfamily protein	-	-	1	-	-	1
AT1G21390.1	-0.0625771	-0.61714	0.136122	0.237936	0.821265	0.00260337	0.878429	0.817915	embryo defective 2170	1	-	-	-	-	1
AT3G54670.1	0.288767	0.102027	-0.0991228	0.093306	0.0330692	0.62214	0.734693	0.817734	Structural maintenance of chromosomes (SMC) family protein	-	-	-	1	-	1
AT3G13690.1	-1.04869	-0.581416	-0.429622	-0.114298	6.88185e-14	7.87535e-05	0.0590658	0.816976	Protein kinase protein with adenine nucleotide alpha hydrolases-like domain	-	-	1	-	-	1
AT2G45980.1	1.07672	0.0980446	0.600171	0.136172	2.11631e-17	0.661653	0.0198927	0.816676		-	1	-	-	-	1
AT1G17720.1	0.436123	0.0818313	0.0669612	-0.068266	1.32514e-10	0.422726	0.759761	0.816644	Protein phosphatase 2A, regulatory subunit PR55	-	-	1	-	-	1
AT5G02740.1	-0.379983	0.0969699	-0.205804	-0.0988874	0.00151997	0.597196	0.395942	0.816521	Ribosomal protein S24e family protein	-	-	1	-	-	1
AT5G05320.1	-3.10873	-1.09982	-0.4093	-0.796494	2.54113e-09	0.0452527	0.893284	0.816117	FAD/NAD(P)-binding oxidoreductase family protein	-	-	-	1	-	1
AT5G14470.1	5.69779	-1.29922	1.6041	-0.787518	0.0114914	0.738776	0.4057	0.816117	GHMP kinase family protein	-	-	-	-	1	1
AT3G12280.1	0.370079	0.268831	0.0401126	0.104127	0.00101612	0.0339485	0.921058	0.815874	retinoblastoma-related 1	-	1	-	-	-	1
AT4G29910.2	-0.941004	0.0253423	-0.283685	-0.185994	1.16948e-07	0.947544	0.579634	0.815703		-	-	-	1	-	1
AT4G35987.1	-0.541158	0.0425862	0.0975027	0.164462	0.0235182	0.930267	0.869644	0.81527	S-adenosyl-L-methionine-dependent methyltransferases superfamily protein	-	-	1	-	-	1
AT1G10450.3	0.0838754	0.0135889	-0.602756	0.131753	0.531452	0.955003	0.0139274	0.812858		1	-	-	-	-	1
AT5G23030.1	0.67463	1.16039	0.462215	-2.67317	0.0167267	1.40599e-05	NA	0.812449	tetraspanin12	-	-	1	-	-	1
AT1G09795.1	1.14064	1.1747	0.129549	0.208557	2.29391e-07	1.2719e-07	0.859858	0.812449	ATP phosphoribosyl transferase 2	-	1	-	-	-	1
AT2G46980.2	0.0557356	0.620564	0.35932	0.183959	0.880726	0.0185076	0.423332	0.812449		-	-	1	-	-	1
AT3G20840.1	-0.762426	-0.105558	0.411375	0.589924	4.82087e-05	0.744327	0.84506	0.811679	Integrase-type DNA-binding superfamily protein	-	-	1	-	-	1
AT5G62440.1	-0.690817	0.240953	-1.02025	-0.194308	0.00100253	0.41644	0.00301602	0.810989	Protein of unknown function (DUF3223)	-	-	-	-	1	1
AT1G32130.1	0.462805	0.0495843	0.217066	0.121607	0.000137136	0.834144	0.481874	0.810461	Transcription elongation factor (TFIIS) family protein	-	1	-	-	-	1
AT5G11880.1	-0.45426	-0.0213117	-0.504132	-0.125908	0.00071924	0.944424	0.0339825	0.809903	Pyridoxal-dependent decarboxylase family protein	1	-	-	-	-	1
AT5G37210.1	-0.132846	-1.15916	-0.0338246	-2.66968	0.801429	0.00455317	NA	0.809781	Cysteine/Histidine-rich C1 domain family protein	-	-	1	-	-	1
AT3G16480.1	-0.322882	0.172101	-0.275932	-0.0753308	0.00689893	0.260097	0.0595068	0.809505	mitochondrial processing peptidase alpha subunit	-	-	-	1	-	1
AT4G28400.1	-0.792752	-0.331948	0.411938	0.174411	5.89907e-05	0.163452	0.299138	0.809386	Protein phosphatase 2C family protein	-	-	-	1	-	1
AT5G26910.1	-0.47738	-0.194824	-0.0454026	0.10153	0.00195053	0.331933	0.905391	0.808876		-	-	1	-	-	1
AT2G19450.1	0.221187	-0.0519121	0.169133	0.278591	0.0290229	0.766923	0.861802	0.808876	membrane bound O-acyl transferase (MBOAT) family protein	-	-	1	-	-	1
AT1G64590.1	-0.278615	-1.80378	0.809186	-0.809576	0.439901	4.70931e-10	0.752361	0.808778	NAD(P)-binding Rossmann-fold superfamily protein	-	-	1	-	-	1
AT5G65230.1	2.08479	0.381333	1.91694	0.493067	1.7592e-10	0.455346	0.0591667	0.808351	myb domain protein 53	-	-	-	1	-	1
AT5G45510.1	-0.91012	-0.626914	-0.301469	-0.36841	5.84298e-09	0.000185217	0.803978	0.808345	Leucine-rich repeat (LRR) family protein	-	-	1	-	-	1
AT4G18010.1	-0.912769	-1.3731	0.433009	-0.153081	0.000162791	1.29383e-08	0.17563	0.808345	myo-inositol polyphosphate 5-phosphatase 2	-	-	1	-	-	1
AT3G23580.1	0.130197	0.609718	0.0958123	0.214914	0.602171	0.00171709	0.906017	0.808312	ribonucleotide reductase 2A	-	-	-	1	-	1
AT5G14960.1	1.18149	0.455378	0.946504	0.407205	0.00267629	0.38334	0.309973	0.808312	DP-E2F-like 2	-	1	-	-	-	1
AT1G06710.12	-0.670332	0.0141719	-0.609358	-0.167324	0.00204214	0.97769	0.0617445	0.808312		-	-	1	-	-	1
AT1G60620.1	-0.371611	0.0456626	-0.764024	0.144137	0.0507566	0.896928	0.00257037	0.808312	RNA polymerase I subunit 43	-	1	-	-	-	1
AT1G69710.1	1.08144	-0.0591309	-0.0316571	-0.508503	0.0021261	0.938662	0.9867	0.808311	Regulator of chromosome condensation (RCC1) family with FYVE zinc finger domain	-	-	-	1	-	1
AT1G56560.1	0.45396	0.177065	-0.0192092	0.114817	0.00122801	0.356687	0.968218	0.808311	Plant neutral invertase family protein	-	1	-	-	-	1
AT5G55700.1	0.902053	0.199862	0.312966	0.150609	1.6768e-11	0.279716	0.370778	0.808211	beta-amylase 4	-	1	-	-	-	1
AT5G19240.1	-3.0397	-2.78258	-0.365191	-0.774643	4.81243e-07	8.97626e-06	0.89959	0.808099	Glycoprotein membrane precursor GPI-anchored	-	-	-	1	-	1
AT1G14350.1	-0.673813	0.165385	0.123887	0.19139	0.0299795	0.749208	0.851994	0.807924	Duplicated homeodomain-like superfamily protein	1	-	-	-	-	1
AT4G00840.1	0.406122	0.0229424	0.279714	0.121254	0.00357943	0.941704	0.2915	0.807924	DHHC-type zinc finger family protein	-	1	-	-	-	1
AT1G73200.1	0.63887	0.226504	0.553228	0.110331	3.39036e-09	0.088767	0.00394867	0.807924	Putative integral membrane protein conserved region (DUF2404)	-	-	-	-	1	1
AT3G25690.5	-0.536693	-0.351441	0.193922	0.171924	0.00566961	0.117603	0.698498	0.807866		-	-	-	-	1	1
AT5G19350.1	-0.217369	0.0421054	-0.208952	-0.0781309	0.041562	0.821031	0.208759	0.807786	RNA-binding (RRM/RBD/RNP motifs) family protein	-	1	-	-	-	1
AT5G11020.1	1.06763	-0.44792	-0.131163	-0.19024	1.21691e-10	0.0270001	0.839296	0.807713	Protein kinase superfamily protein	-	-	1	-	-	1
AT4G30080.1	0.25731	0.511118	-0.11903	0.118004	0.292123	0.0308508	0.742153	0.807713	auxin response factor 16	-	-	-	-	1	1
AT4G15640.1	-0.697406	-0.0624013	-1.16747	-0.198716	1.49756e-06	0.819061	0.000521337	0.807684		-	-	-	-	1	1
AT1G16490.1	0.885846	0.632855	-0.24775	-0.310664	0.0357304	0.181516	0.821254	0.807472	myb domain protein 58	-	-	1	-	-	1
AT5G24313.1	-0.838072	-0.675295	-0.777824	-1.73976	0.00330938	0.0224212	NA	0.807271		-	-	-	1	-	1
AT1G49430.1	2.30469	0.117131	0.861986	-0.123645	3.02327e-12	0.868275	1.37375e-05	0.806981	long-chain acyl-CoA synthetase 2	-	-	-	-	1	1
AT3G25510.1	-3.48891	-2.09609	0.275572	-1.04827	9.84747e-12	3.72817e-07	0.947713	0.806925	disease resistance protein (TIR-NBS-LRR class), putative	-	-	-	1	-	1
AT5G08000.2	-5.27912	0.424848	-0.219093	0.227023	0.0264569	0.919802	0.751965	0.806709		1	-	-	-	-	1
AT1G70070.1	-0.78661	0.111566	-0.285517	-0.142083	0.000152528	0.745089	0.391427	0.806709	DEAD/DEAH box helicase, putative	-	-	1	-	-	1
AT4G16270.1	0.399939	-1.30122	2.44681	0.863377	0.247707	8.29322e-05	0.248235	0.806709	Peroxidase superfamily protein	-	1	-	-	-	1
AT1G31650.1	-0.714109	0.191411	-0.225327	-0.0853455	2.08806e-05	0.40181	0.204096	0.805784	RHO guanyl-nucleotide exchange factor 14	-	-	-	-	1	1
AT5G53500.1	0.192829	-0.721841	-0.035335	-0.211553	0.516365	0.00576674	0.96818	0.805366	Transducin/WD40 repeat-like superfamily protein	-	-	-	-	1	1
AT5G54830.1	0.345918	0.215265	0.0555103	0.129159	0.00313694	0.126096	0.907165	0.805366	DOMON domain-containing protein / dopamine beta-monooxygenase N-terminal domain-containing protein	-	-	1	-	-	1
AT1G29220.2	0.351343	0.0620564	0.0143494	-0.115555	0.0217078	0.821541	0.975923	0.805336	transcriptional regulator family protein	1	-	-	-	-	1
AT5G63940.1	-0.654366	-0.575636	-0.303801	-0.0863205	0.000125242	0.00140362	0.0676979	0.805317	Protein kinase protein with adenine nucleotide alpha hydrolases-like domain	-	-	1	-	-	1
AT1G07650.2	-1.18444	-0.70038	0.147881	-0.154232	4.48049e-07	0.00565132	0.752493	0.805244	Leucine-rich repeat transmembrane protein kinase	-	-	1	-	-	1
AT1G14687.1	-2.43551	-0.857312	-0.259255	0.267049	0.018023	0.495117	0.749248	0.804626	homeobox protein 32	-	1	-	-	-	1
AT4G31310.2	-0.245085	-0.463486	0.615921	0.182348	0.170638	0.0059349	0.081479	0.804626		-	1	-	-	-	1
AT5G08565.1	0.683017	0.406049	-0.1452	-0.597656	0.015259	0.234144	0.951871	0.803544	Transcription initiation Spt4-like protein	-	1	-	-	-	1
AT4G11050.1	0.860018	-0.518443	0.87431	-0.694982	0.00427501	0.177417	0.587318	0.803334	glycosyl hydrolase 9C3	-	-	1	-	-	1
AT1G05790.3	0.564717	0.253073	0.207949	0.129403	0.00373971	0.334599	0.521893	0.802344		-	-	1	-	-	1
AT4G17730.2	0.00962305	-0.635921	0.226464	0.130777	0.98449	0.0251826	0.485692	0.802195	syntaxin of plants 23	-	1	-	-	-	1
AT5G58290.1	0.657555	0.119649	0.230078	-0.108088	2.66336e-08	0.523392	0.342803	0.802037	regulatory particle triple-A ATPase 3	-	-	-	-	1	1
AT3G11910.1	0.325101	0.166005	-0.0606646	0.102776	0.00429571	0.262616	0.861122	0.802018	ubiquitin-specific protease 13	-	1	-	-	-	1
AT3G05050.1	0.339318	-0.213844	-0.0923526	-0.134211	0.00447195	0.140064	0.834872	0.800418	Protein kinase superfamily protein	-	-	1	-	-	1
AT1G06040.1	-0.621708	-0.654305	0.011411	0.0882698	0.0351257	0.0425882	0.974845	0.799997	B-box zinc finger family protein	-	-	1	-	-	1
AT5G18370.1	-1.00378	-0.170091	-0.0797486	0.222	0.000200246	0.702055	0.9247	0.799997	Disease resistance protein (TIR-NBS-LRR class) family	1	-	-	-	-	1
AT3G55980.2	-1.16717	-0.992455	0.222775	0.373444	0.00134031	0.0113605	0.859066	0.799997		-	-	1	-	-	1
AT1G28600.1	1.75799	0.161438	0.416259	-0.161997	0.015488	0.915362	0.211401	0.799997	GDSL-like Lipase/Acylhydrolase superfamily protein	-	1	-	-	-	1
AT1G63020.1	0.0320968	0.538506	-0.345206	-0.219651	0.913134	0.00510026	0.530327	0.799163	nuclear RNA polymerase D1A	-	-	-	-	1	1
AT5G23390.1	0.622986	0.315694	0.12598	0.0950081	1.13212e-06	0.0336224	0.615434	0.799124	Plant protein of unknown function (DUF639)	-	-	1	-	-	1
AT5G61410.1	1.16506	0.455079	0.251655	-0.139907	1.93775e-11	0.0263991	0.445407	0.798757	D-ribulose-5-phosphate-3-epimerase	-	1	-	-	-	1
AT2G27600.1	0.337961	0.0393181	0.175697	-0.0610654	4.55032e-08	0.720482	0.143283	0.798757	AAA-type ATPase family protein	1	-	-	-	-	1
AT5G28640.1	-0.570318	-0.190368	-0.491523	-0.177402	0.000212572	0.37269	0.162802	0.798655	SSXT family protein	-	-	1	-	-	1
AT2G36230.1	-0.546982	0.104654	-0.370285	-0.223249	0.00989888	0.772155	0.493766	0.797822	Aldolase-type TIM barrel family protein	-	-	-	1	-	1
AT4G13195.1	1.26001	1.1917	0.412711	0.311004	0.00568966	0.00636143	0.627228	0.797569	CLAVATA3/ESR-RELATED 44	-	-	-	-	1	1
AT5G51150.1	0.35325	0.0932837	0.283235	0.148879	0.0186924	0.699405	0.403097	0.797569	Mitochondrial import inner membrane translocase subunit Tim17/Tim22/Tim23 family protein	-	1	-	-	-	1
AT4G29510.1	-0.652149	0.186704	-0.779744	-0.184434	2.1391e-11	0.111961	0.015745	0.797569	arginine methyltransferase 11	1	-	-	-	-	1
AT3G60910.1	-0.125982	-0.508998	-0.102455	-0.165946	0.565008	0.00590535	0.853565	0.797293	S-adenosyl-L-methionine-dependent methyltransferases superfamily protein	-	1	-	-	-	1
AT3G19740.1	-0.200596	0.0464082	-0.379011	-0.0846726	0.158133	0.854097	0.00890923	0.797293	P-loop containing nucleoside triphosphate hydrolases superfamily protein	-	-	-	-	1	1
AT4G32060.1	0.231889	-0.350495	0.251454	0.0964814	0.132457	0.026471	0.199003	0.797033	calcium-binding EF hand family protein	-	-	1	-	-	1
AT5G50350.1	0.738593	0.513247	0.230097	-0.132661	1.21985e-07	0.000543449	0.451091	0.796994		1	-	-	-	-	1
AT3G47630.2	0.378628	-0.0108998	0.294697	0.205854	0.0329921	0.978485	0.575587	0.796296		1	-	-	-	-	1
AT3G60590.3	0.506139	0.432474	0.245673	0.104044	0.0081226	0.0332493	0.266009	0.796257		1	-	-	-	-	1
AT4G27430.1	-0.0934339	-0.289511	-0.175971	-0.169816	0.52597	0.0286555	0.714283	0.796007	COP1-interacting protein 7	-	-	-	-	1	1
AT5G04290.1	-0.516927	-0.0377699	-0.414229	0.123675	0.0171858	0.935574	0.0704521	0.796007	kow domain-containing transcription factor 1	1	-	-	-	-	1
AT4G38370.1	-0.636012	-0.0943455	0.279267	-0.16575	0.00336052	0.800102	0.482267	0.795918	Phosphoglycerate mutase family protein	-	-	1	-	-	1
AT1G60430.1	1.15078	0.300366	0.649694	-0.178512	8.07401e-10	0.241988	0.0379776	0.795715	actin-related protein C3	-	1	-	-	-	1
AT1G58410.1	-0.896508	-0.593918	-0.114985	-0.325801	0.000763824	0.0500293	0.922756	0.795287	Disease resistance protein (CC-NBS-LRR class) family	-	-	1	-	-	1
AT2G42600.1	-0.322458	0.164859	-0.0532048	0.177929	0.00457818	0.248657	0.936501	0.794884	phosphoenolpyruvate carboxylase 2	-	-	-	1	-	1
AT3G61300.1	0.264659	-1.21452	1.24391	-0.756679	0.300698	9.55805e-08	0.421742	0.794673	C2 calcium/lipid-binding plant phosphoribosyltransferase family protein	-	-	1	-	-	1
AT2G33460.1	-1.52779	-0.306477	0.195411	1.91023	0.0168936	0.774853	0.978308	0.794058	ROP-interactive CRIB motif-containing protein 1	1	-	-	-	-	1
AT4G14350.1	0.382298	0.0945149	0.208811	0.111852	0.00635778	0.68021	0.405348	0.793696	AGC (cAMP-dependent, cGMP-dependent and protein kinase C) kinase family protein	-	-	1	-	-	1
AT3G56620.1	2.23733	0.797305	0.999727	-0.542863	1.16999e-05	0.243595	0.405873	0.792692	nodulin MtN21 /EamA-like transporter family protein	-	-	1	-	-	1
AT5G66160.1	0.489548	0.178951	0.316818	0.131966	0.00440441	0.467031	0.240688	0.792545	receptor homology region transmembrane domain ring H2 motif protein 1	-	-	-	1	-	1
AT1G69080.1	0.193862	-1.01762	0.0840581	0.254139	0.484051	1.1864e-05	0.931203	0.792411	Adenine nucleotide alpha hydrolases-like superfamily protein	1	-	-	-	-	1
AT5G10330.1	-0.641195	-0.148591	-0.194554	-0.140672	6.49562e-06	0.471088	0.581137	0.791499	histidinol phosphate aminotransferase 1	-	1	-	-	-	1
AT1G73160.1	-0.578162	-0.149206	-0.362632	1.24964	0.0290862	0.735686	0.930675	0.791123	UDP-Glycosyltransferase superfamily protein	-	1	-	-	-	1
AT5G16040.1	-0.14743	0.395408	-0.377415	0.235176	0.358285	0.00500454	0.501119	0.791036	Regulator of chromosome condensation (RCC1) family protein	-	-	-	-	1	1
AT5G23575.1	0.274468	0.573863	0.145649	0.279944	0.0220686	4.48795e-07	0.875987	0.79093	Transmembrane CLPTM1 family protein	-	-	1	-	-	1
AT3G28580.1	-2.38774	-4.01734	-0.82936	-1.10376	0.0682212	0.00237365	0.809316	0.790594	P-loop containing nucleoside triphosphate hydrolases superfamily protein	-	-	-	1	-	1
AT3G12020.2	-0.0163771	-0.298303	-0.224794	-0.114296	0.937133	0.0317824	0.368644	0.790553	P-loop containing nucleoside triphosphate hydrolases superfamily protein	-	-	1	-	-	1
AT5G39840.1	-0.804141	-0.125588	-1.24473	-0.229664	0.000185184	0.732286	0.000713787	0.790112	ATP-dependent RNA helicase, mitochondrial, putative	-	-	-	-	1	1
AT4G11850.1	-1.23309	-1.16145	-0.425858	-0.403449	4.18784e-12	1.3072e-10	0.699324	0.789665	phospholipase D gamma 1	-	-	-	-	1	1
AT1G17220.1	-0.975003	-0.421902	-0.258912	-0.123427	3.54457e-09	0.0249471	0.324952	0.789665	Translation initiation factor 2, small GTP-binding protein	-	1	-	-	-	1
AT4G26800.2	-1.17586	-0.0489623	-1.00722	-0.298907	0.00316998	0.95258	0.0794273	0.789665		-	-	-	-	1	1
AT5G14220.4	-0.812173	-0.301329	-0.0720315	-0.0944177	5.41542e-08	0.0852616	0.802657	0.789111		-	1	-	-	-	1
AT4G34380.1	3.9397	2.84952	2.12144	0.836675	3.20204e-15	2.17745e-08	0.199982	0.788391	Transducin/WD40 repeat-like superfamily protein	-	-	1	-	-	1
AT5G45440.1	-0.440756	-0.749984	-0.339726	-0.411163	0.0621739	0.000981094	0.785339	0.78819	P-loop containing nucleoside triphosphate hydrolases superfamily protein	-	-	-	-	1	1
AT4G32860.1	0.511104	-0.0226205	0.18181	0.374984	0.000176456	0.942046	0.88082	0.787918		-	-	1	-	-	1
AT3G20620.1	0.76708	0.5326	0.542967	0.152236	1.78192e-08	0.000139928	0.0442823	0.787795	F-box family protein-related	-	-	1	-	-	1
AT2G45680.1	1.13356	1.09472	0.27454	0.237578	0.000330968	0.000870487	0.662642	0.787666	TCP family transcription factor	-	-	1	-	-	1
AT2G01170.1	-0.360259	-0.195995	0.00938004	0.174466	0.00891131	0.254733	0.988139	0.786945	bidirectional amino acid transporter 1	-	-	-	-	1	1
AT1G70590.1	0.394546	-0.286717	0.633996	0.162375	0.0955084	0.342591	0.023043	0.786945	F-box family protein	-	1	-	-	-	1
AT1G68820.4	1.1508	0.297085	0.615995	0.146882	1.03044e-19	0.0607798	0.0125287	0.786945		-	-	-	-	1	1
AT2G31040.1	0.352817	0.669795	0.262668	0.216134	0.163933	0.00468614	0.639277	0.786733	ATP synthase protein I -related	-	-	1	-	-	1
AT3G23630.1	-2.91264	-0.910577	0.929701	0.887101	7.6428e-10	0.05067	0.733106	0.786592	isopentenyltransferase 7	-	1	-	-	-	1
AT2G42430.1	-0.310631	0.609434	-0.461142	0.818562	0.352225	0.0411964	0.866372	0.786214	lateral organ boundaries-domain 16	-	-	1	-	-	1
AT1G61795.1	1.0958	-0.676561	0.209098	-0.250599	1.94595e-05	0.0267757	0.776092	0.786109	PAK-box/P21-Rho-binding family protein	-	-	1	-	-	1
AT5G22430.1	-4.33618	-0.943371	-3.29523	-3.30334	0.0457769	0.761585	NA	0.785365	Pollen Ole e 1 allergen and extensin family protein	-	1	-	-	-	1
AT1G56460.3	-0.541899	-0.313959	0.168052	0.152327	0.00114133	0.107263	0.679217	0.785365		1	-	-	-	-	1
AT3G01820.1	0.213271	0.459597	-0.207535	0.185791	0.083876	2.80637e-05	0.676314	0.785365	P-loop containing nucleoside triphosphate hydrolases superfamily protein	-	-	1	-	-	1
AT3G10800.1	0.450114	0.00412283	0.480219	0.146554	1.66971e-05	0.987645	0.0665899	0.785365	Basic-leucine zipper (bZIP) transcription factor family protein	-	1	-	-	-	1
AT1G74880.1	-2.49727	-2.53149	-0.199481	0.19013	0.00523448	0.00593687	0.696177	0.784712	NAD(P)H:plastoquinone dehydrogenase complex subunit O	-	1	-	-	-	1
AT5G01850.2	1.15467	0.477434	0.455974	0.260538	4.6902e-18	0.000932548	0.432282	0.784591		-	1	-	-	-	1
AT3G14240.1	-0.397683	-0.165921	-0.294985	-0.156707	0.0153167	0.477737	0.386502	0.784494	Subtilase family protein	-	-	1	-	-	1
AT5G47820.1	-0.511055	-0.0507118	-0.296596	-0.123626	0.00285635	0.88285	0.225714	0.784158	P-loop containing nucleoside triphosphate hydrolases superfamily protein	-	-	1	-	-	1
AT1G76620.1	2.03979	1.03885	0.595098	0.25069	1.71565e-05	0.0586261	0.222923	0.784158	Protein of unknown function, DUF547	1	-	-	-	-	1
AT3G46870.2	-0.53638	-0.00905054	-0.592433	-0.303097	0.0328831	0.98696	0.357014	0.784043		-	1	-	-	-	1
AT4G24290.2	0.29934	0.11329	0.366399	0.172552	0.0111124	0.512192	0.306493	0.784007	MAC/Perforin domain-containing protein	-	-	-	1	-	1
AT4G30520.1	-0.553717	0.199934	-0.101924	0.168594	0.000661857	0.337731	0.85137	0.783916	Leucine-rich repeat protein kinase family protein	-	-	1	-	-	1
AT5G07730.1	0.555259	-0.108648	0.133841	0.22848	0.0443116	0.823992	0.851593	0.782297		-	-	-	-	1	1
AT1G62305.1	1.75391	0.553606	1.3024	0.320138	1.58676e-25	0.00404041	0.013837	0.782031	Core-2/I-branching beta-1,6-N-acetylglucosaminyltransferase family protein	-	1	-	-	-	1
AT3G29430.1	-2.00736	-5.03919	-4.46094	-3.26073	0.00321335	5.15497e-10	0.571406	0.781835	Terpenoid synthases superfamily protein	-	-	-	1	-	1
AT1G74180.1	-0.841692	-0.705079	-0.665034	-0.192861	0.00134565	0.00828788	0.0497047	0.781835	receptor like protein 14	-	1	-	-	-	1
AT3G05400.1	1.68603	1.94215	0.397835	0.444291	0.0189436	0.00471612	0.747759	0.781693	Major facilitator superfamily protein	-	1	-	-	-	1
AT1G24090.1	-1.48741	0.0787531	-2.35758	-0.523589	7.4734e-05	0.91395	0.00731613	0.780888	RNase H family protein	-	-	-	1	-	1
AT5G08240.1	-1.056	-1.85432	-0.0702252	-0.728767	0.0150562	1.26921e-05	0.978847	0.780779		-	-	1	-	-	1
AT5G36220.1	-1.74075	1.04933	-0.517378	0.414678	1.23941e-05	0.00534092	0.621893	0.780779	cytochrome p450 81d1	-	-	1	-	-	1
AT2G21790.1	-0.862955	0.0933394	-0.648204	-0.220713	1.68083e-08	0.733607	0.104877	0.780779	ribonucleotide reductase 1	-	-	1	-	-	1
AT5G25020.1	-0.876341	-0.646652	-0.221159	0.475684	0.00182677	0.0380022	0.887239	0.780693	Protein of unknown function (DUF1336)	-	1	-	-	-	1
AT1G69960.1	0.587829	0.00514228	0.190907	-0.160061	1.22377e-11	0.982428	0.638438	0.780574	serine/threonine protein phosphatase 2A	-	1	-	-	-	1
AT2G40900.1	1.46396	0.0912986	1.28072	0.328391	2.5691e-18	0.777309	0.0183181	0.780392	nodulin MtN21 /EamA-like transporter family protein	1	-	-	-	-	1
AT2G22300.1	-1.09769	-0.416553	0.123867	0.103552	4.07786e-07	0.122711	0.635622	0.780123	signal responsive 1	-	-	1	-	-	1
AT3G52190.1	-0.615052	-0.262763	-0.321348	-0.287806	0.00157801	0.314152	0.665245	0.780094	phosphate transporter traffic facilitator1	-	-	-	1	-	1
AT5G45240.1	1.28309	-6.55143	-0.880953	-2.22034	0.693059	0.0308849	0.910611	0.779678	Disease resistance protein (TIR-NBS-LRR class)	-	-	-	1	-	1
AT1G70690.1	-0.249936	-1.07906	-0.186952	-0.435143	0.173954	3.31206e-11	0.898635	0.779354	Receptor-like protein kinase-related family protein	-	-	1	-	-	1
AT1G71460.1	-1.15633	-0.147055	-0.560401	-0.328219	0.000244689	0.779248	0.434442	0.779048	Pentatricopeptide repeat (PPR-like) superfamily protein	-	-	-	1	-	1
AT2G28900.1	-0.263765	0.39692	0.498709	0.609539	0.194412	0.0436191	0.776092	0.778827	outer plastid envelope protein 16-1	-	-	-	-	1	1
AT5G19410.2	2.95071	-0.0345108	3.33298	0.421965	6.09832e-13	0.973596	1.19985e-09	0.778827		1	-	-	-	-	1
AT2G45950.2	0.991105	0.316691	-0.0471355	-0.126495	8.37066e-12	0.0759994	0.912818	0.778479	SKP1-like 20	1	-	-	-	-	1
AT1G62045.1	1.37618	0.693699	1.09486	0.391862	2.59263e-09	0.00664015	0.118791	0.778479		-	-	-	1	-	1
AT3G58830.2	0.682696	0.268944	-0.164327	-0.182238	0.000508786	0.31597	0.743767	0.778269		-	-	-	1	-	1
AT1G73540.1	1.45312	0.17027	0.157525	0.342634	1.37897e-08	0.702055	0.890043	0.77774	nudix hydrolase homolog 21	-	1	-	-	-	1
AT5G39240.1	-0.10433	-0.693166	-0.519561	-0.666034	0.747287	0.0042528	0.782261	0.777592		-	-	1	-	-	1
AT3G27270.2	2.44889	0.481017	0.669045	0.287586	5.37133e-10	0.417036	0.215039	0.777592		-	-	1	-	-	1
AT5G63680.1	-0.469655	-0.182266	-0.351603	-0.275511	0.000123522	0.257542	0.601056	0.777101	Pyruvate kinase family protein	-	1	-	-	-	1
AT1G64790.2	-0.336539	0.0544003	-0.5866	-0.146449	0.0201386	0.841276	0.0136831	0.777101	ILITYHIA	1	-	-	-	-	1
AT2G02560.1	-0.216826	0.106477	-0.0278202	0.0796151	0.0330833	0.44393	0.918342	0.777092	cullin-associated and neddylation dissociated	-	-	1	-	-	1
AT2G26740.1	0.132211	3.07674	0.549511	0.260981	0.903513	3.58102e-06	0.295599	0.776878	soluble epoxide hydrolase	-	1	-	-	-	1
AT5G46390.2	-0.586991	-0.128814	-0.0651873	-0.153062	0.0465522	0.779954	0.899378	0.776683	Peptidase S41 family protein	-	-	1	-	-	1
AT4G27040.1	0.288533	0.0521691	0.16822	0.122046	0.011346	0.791886	0.561568	0.775905	EAP30/Vps36 family protein	-	-	-	-	1	1
AT3G53620.1	1.14257	0.53934	0.622849	0.150871	3.87329e-26	2.986e-06	0.00974739	0.775905	pyrophosphorylase 4	-	-	-	1	-	1
AT3G07020.1	0.358338	0.16129	0.250608	0.137402	0.000813402	0.239933	0.388465	0.775489	UDP-Glycosyltransferase superfamily protein	-	-	1	-	-	1
AT5G52200.1	0.631849	0.250842	0.221674	-0.13404	3.4371e-05	0.204737	0.446019	0.775357	phosphoprotein phosphatase inhibitors	-	1	-	-	-	1
AT2G43550.1	-1.32052	0.0428396	0.778586	0.371933	0.00145754	0.962922	0.295288	0.775357	Scorpion toxin-like knottin superfamily protein	-	1	-	-	-	1
AT5G47455.4	-0.586576	0.21116	-0.64304	-0.247333	0.00348083	0.424441	0.157159	0.775357		-	-	1	-	-	1
AT3G08943.1	-0.667681	-0.0453047	-0.770125	-0.122664	3.65117e-07	0.867711	1.67981e-05	0.774922	ARM repeat superfamily protein	-	1	-	-	-	1
AT2G26440.1	-4.50941	-2.77601	-1.0099	-0.87761	5.42173e-11	1.18537e-05	0.646014	0.774917	Plant invertase/pectin methylesterase inhibitor superfamily	-	-	-	1	-	1
AT5G11960.1	0.59571	0.0314683	0.201947	-0.149896	4.40548e-07	0.901771	0.565515	0.774837	Protein of unknown function (DUF803)	-	-	-	1	-	1
AT2G32920.1	-0.513141	0.077154	-0.479467	-0.239759	0.000182173	0.751377	0.324374	0.774837	PDI-like 2-3	-	1	-	-	-	1
AT5G04130.1	-0.705438	0.106586	-0.612342	-0.196784	2.29284e-07	0.627399	0.0721258	0.774837	DNA GYRASE B2	-	-	1	-	-	1
AT1G73590.1	-0.740634	0.278186	-0.510103	-0.196548	4.5443e-05	0.24083	0.156886	0.774785	Auxin efflux carrier family protein	-	-	1	-	-	1
AT5G13300.1	-0.408381	0.246705	-0.246614	0.170712	0.00268365	0.125498	0.530604	0.774471	ARF GTPase-activating protein	-	-	-	1	-	1
AT5G61790.1	-0.601073	0.0836159	-0.644739	-0.257123	9.08637e-05	0.76449	0.177591	0.774471	calnexin 1	-	1	-	-	-	1
AT5G49340.1	2.76399	1.49494	3.5924	3.43908	1.47886e-11	0.00023175	NA	0.773971	TRICHOME BIREFRINGENCE-LIKE 4	1	-	-	-	-	1
AT1G53950.1	-2.92141	-2.97341	-3.16978	-1.85937	4.94379e-06	7.62364e-06	NA	0.773765	Ubiquitin-like superfamily protein	-	1	-	-	-	1
AT3G07970.1	1.58888	-0.0905787	2.24598	1.39015	0.000598547	0.930409	0.468988	0.773679	Pectin lyase-like superfamily protein	-	-	1	-	-	1
AT1G51700.1	1.85023	1.3361	0.593324	0.319374	6.50105e-09	3.19903e-05	0.371209	0.773679	DOF zinc finger protein 1	-	-	1	-	-	1
AT4G25120.1	-0.339671	-0.239463	-0.55737	-0.150966	0.073558	0.313868	0.0221802	0.773569	P-loop containing nucleoside triphosphate hydrolases superfamily protein	-	-	-	-	1	1
AT2G39010.1	0.522532	1.15892	0.809149	0.204818	0.410496	0.058132	0.0135745	0.773184	plasma membrane intrinsic protein 2E	1	-	-	-	-	1
AT3G51510.1	0.191962	2.38089	0.318725	0.153291	0.810407	1.0987e-05	0.293294	0.772103		-	1	-	-	-	1
AT2G33550.1	-1.5243	-0.332043	-0.769413	-0.160239	5.66057e-13	0.22547	0.00282221	0.77209	Homeodomain-like superfamily protein	-	-	-	1	-	1
AT4G22230.1	-2.04052	-1.02665	0.142933	-2.38318	3.10281e-07	0.0195192	0.986068	0.771876	Arabidopsis defensin-like protein	1	-	-	-	-	1
AT3G21610.1	0.759764	0.342975	0.528312	0.128861	9.68562e-06	0.102021	0.0084928	0.771876	Acid phosphatase/vanadium-dependent haloperoxidase-related protein	-	-	-	1	-	1
AT5G66490.1	-3.03969	-1.5663	0.0121346	0.342273	1.17697e-17	3.79838e-06	0.99226	0.771441		-	-	-	1	-	1
AT1G11050.1	-1.20247	-0.43283	-0.132019	0.229249	4.67771e-05	0.258081	0.851144	0.771441	Protein kinase superfamily protein	-	-	1	-	-	1
AT4G36040.1	-0.65335	-1.51877	-0.314995	-0.135587	0.0903399	3.22693e-05	0.218074	0.771441	Chaperone DnaJ-domain superfamily protein	-	-	-	1	-	1
AT1G72540.1	4.14187	1.0016	2.00382	0.723598	1.63664e-09	0.288356	0.136907	0.771441	Protein kinase superfamily protein	-	-	1	-	-	1
AT1G68795.1	2.21517	0.661989	1.86365	0.482898	1.03585e-15	0.0498238	0.00994476	0.771441	CLAVATA3/ESR-RELATED 12	-	-	-	1	-	1
AT1G74860.1	0.587731	0.631385	0.0123007	0.176496	0.00221225	0.00122224	0.98463	0.770875		-	1	-	-	-	1
AT1G66160.1	-1.96265	-1.11501	-0.102352	-0.4884	0.00578203	0.206109	0.95398	0.770875	CYS, MET, PRO, and GLY protein 1	-	-	1	-	-	1
AT1G32500.1	-0.505973	0.112557	-0.308071	-0.118161	0.000126071	0.569008	0.146258	0.770875	non-intrinsic ABC protein 6	-	1	-	-	-	1
AT5G48900.1	0.790267	-0.0899305	-0.0187654	-0.226536	0.000380786	0.835051	0.98159	0.770491	Pectin lyase-like superfamily protein	-	-	1	-	-	1
AT4G33020.2	-0.11564	-1.68327	0.935585	2.14548	0.904457	0.0194763	0.893164	0.770362		-	-	-	-	1	1
AT2G26750.1	1.95886	2.74008	0.714681	0.427741	0.00500139	2.68363e-05	0.431626	0.769688	alpha/beta-Hydrolases superfamily protein	-	-	-	-	1	1
AT4G40080.1	0.329712	-0.615562	0.0363276	-0.375164	0.199497	0.0164903	0.978253	0.769533	ENTH/ANTH/VHS superfamily protein	-	-	-	1	-	1
AT4G21340.1	0.531689	-0.311402	-0.440749	-3.48291	0.00933315	0.243534	0.972123	0.769351	basic helix-loop-helix (bHLH) DNA-binding superfamily protein	-	1	-	-	-	1
AT2G25110.1	-0.328509	0.00675433	-0.229387	-0.23963	0.0213502	0.984594	0.710954	0.769046	stromal cell-derived factor 2-like protein precursor	-	1	-	-	-	1
AT5G39850.1	-0.851272	0.34564	-0.936136	0.168357	4.81742e-09	0.0232436	0.00028399	0.768752	Ribosomal protein S4	-	-	1	-	-	1
AT1G13270.1	-0.748957	0.517725	-0.177094	-0.419795	0.00015612	0.0082463	0.896708	0.768251	methionine aminopeptidase 1B	1	-	-	-	-	1
AT3G47090.1	-1.98567	-5.46839	-0.424639	-0.946664	0.180132	0.00369448	0.889228	0.768251	Leucine-rich repeat protein kinase family protein	-	-	-	1	-	1
AT4G25660.1	0.272444	-0.179925	0.224841	0.142878	0.0474179	0.299892	0.466323	0.768011	PPPDE putative thiol peptidase family protein	-	1	-	-	-	1
AT2G18150.1	0.329375	1.64311	1.049	0.510179	0.44499	1.56736e-06	0.317556	0.767937	Peroxidase superfamily protein	-	-	-	-	1	1
AT1G53210.1	0.291154	-0.0502411	0.323975	0.138146	0.0026514	0.770853	0.204402	0.76774	sodium/calcium exchanger family protein / calcium-binding EF hand family protein	-	1	-	-	-	1
AT1G14750.3	-1.29871	-0.166848	-0.889164	-0.470849	0.000325914	0.771235	0.369998	0.766927		-	1	-	-	-	1
AT5G35980.1	0.738268	0.134374	0.245755	0.106623	2.86435e-21	0.210547	0.212211	0.766927	yeast YAK1-related gene 1	-	-	1	-	-	1
AT4G29920.2	-1.13039	-0.0534313	-0.119615	0.181642	2.0076e-07	0.904671	0.826818	0.7662		1	-	-	-	-	1
AT2G18196.1	-1.64919	-0.995145	-0.684182	-0.444175	7.93155e-07	0.00554272	0.485535	0.765735	Heavy metal transport/detoxification superfamily protein	-	-	-	-	1	1
AT3G18890.1	-1.8222	-0.189432	-0.275829	-0.183554	0.000237993	0.834876	0.490634	0.765713	NAD(P)-binding Rossmann-fold superfamily protein	-	1	-	-	-	1
AT2G20580.1	0.281297	0.165428	0.123793	0.079051	0.0139882	0.260009	0.463529	0.765437	26S proteasome regulatory subunit S2 1A	-	-	1	-	-	1
AT1G68410.1	1.3312	0.836247	0.733443	-0.120222	3.92972e-23	2.80983e-09	9.62149e-06	0.765437	Protein phosphatase 2C family protein	-	-	-	1	-	1
AT5G20910.1	1.34868	0.406068	0.684712	0.262769	3.63474e-06	0.325677	0.1341	0.765127	RING/U-box superfamily protein	-	-	-	-	1	1
AT2G34750.1	-0.224455	-0.0355993	-0.457431	-0.118619	0.0129863	0.829313	0.0135303	0.764475	RNA polymerase I specific transcription initiation factor RRN3 protein	-	-	-	-	1	1
AT5G04470.1	-0.28324	-0.880111	-0.178598	-0.255883	0.283321	0.000209426	0.803573	0.764419	cyclin-dependent protein kinase inhibitors	1	-	-	-	-	1
AT1G58250.2	-0.11167	0.284235	-0.109838	0.107381	0.36728	0.0120457	0.680673	0.764419	Golgi-body localisation protein domain ;RNA pol II promoter Fmp27 protein domain	-	-	1	-	-	1
AT2G43710.1	-0.00221445	0.0870371	-0.393436	-0.107294	0.989036	0.659201	0.0201548	0.763846	Plant stearoyl-acyl-carrier-protein desaturase family protein	-	1	-	-	-	1
AT1G73410.1	2.05891	0.212808	2.62847	-0.992453	3.42019e-06	0.804004	0.120489	0.763491	myb domain protein 54	-	-	-	-	1	1
AT1G03440.1	-0.641178	-0.418052	-0.404174	-0.174999	0.00984087	0.145741	0.20946	0.763422	Leucine-rich repeat (LRR) family protein	-	1	-	-	-	1
AT1G70060.1	0.433808	0.240957	0.124876	0.14225	0.000121141	0.0684802	0.736531	0.763301	SIN3-like 4	-	-	-	-	1	1
AT3G24500.1	1.20883	0.415172	0.93806	0.386121	0.00166865	0.46375	0.176232	0.763301	multiprotein bridging factor 1C	-	1	-	-	-	1
AT1G29340.1	0.570166	-0.0724549	0.183796	0.0901249	0.000530319	0.816951	0.282469	0.762825	plant U-box 17	1	-	-	-	-	1
AT4G15215.11	-0.631984	-0.596217	-0.388683	-0.379647	0.0193024	0.039653	0.666714	0.762663		-	1	-	-	-	1
AT3G50750.1	-2.26228	-1.17458	-0.875256	0.146422	0.000587468	0.0735708	3.75436e-05	0.762663	BES1/BZR1 homolog 1	-	-	1	-	-	1
AT2G22790.1	-0.0341639	-0.699848	1.03144	0.34855	0.948298	0.0397317	0.0718516	0.761941		-	-	1	-	-	1
AT4G27340.1	-1.05511	0.0450567	-0.613953	-0.204548	0.00010335	0.935971	0.0705311	0.761941	Met-10+ like family protein	-	-	-	-	1	1
AT4G18030.1	-0.665091	-0.147654	0.0513725	0.186835	2.59689e-06	0.495616	0.93479	0.761585	S-adenosyl-L-methionine-dependent methyltransferases superfamily protein	1	-	-	-	-	1
AT4G31290.1	0.552475	0.255236	0.355272	0.183394	0.00953813	0.381628	0.318374	0.761485	ChaC-like family protein	1	-	-	-	-	1
AT3G01140.1	-0.825874	-0.834395	0.110893	0.167293	0.049289	0.0558054	0.817786	0.760754	myb domain protein 106	1	-	-	-	-	1
AT3G13200.1	0.556675	0.0246331	0.176303	-0.127147	3.15615e-11	0.89114	0.530856	0.760754	Cwf15 / Cwc15 cell cycle control family protein	1	-	-	-	-	1
AT2G26910.1	0.507351	0.729441	-0.0583911	-0.180412	0.0303127	0.00192913	0.92033	0.760591	pleiotropic drug resistance 4	-	-	-	1	-	1
AT3G05820.2	2.25184	0.369046	1.72197	0.474019	9.5634e-11	0.502197	0.0139274	0.759175		-	1	-	-	-	1
AT5G19380.2	-0.582579	0.125358	-0.301465	-0.273545	0.0300816	0.78312	0.64342	0.759128	CRT (chloroquine-resistance transporter)-like transporter 1	1	-	-	-	-	1
AT1G64700.1	-1.96456	0.0257648	0.381242	0.399688	9.63904e-06	0.978213	0.706781	0.758981		-	-	-	-	1	1
AT1G04650.1	-0.581836	0.345141	-0.234294	0.324901	0.0301056	0.263072	0.790806	0.758883		-	-	1	-	-	1
AT3G04480.1	-0.614753	-0.288397	-0.323032	-0.267678	0.00513225	0.322513	0.600525	0.758877	endoribonucleases	-	-	-	-	1	1
AT5G58350.1	0.698736	0.270524	1.0943	0.828664	0.00931224	0.489517	0.551743	0.758868	with no lysine (K) kinase 4	-	1	-	-	-	1
AT4G14520.10	-0.70783	0.0266141	0.199358	-0.200016	0.0109698	0.963603	0.689285	0.758611		-	-	-	-	1	1
AT5G36210.1	-0.451314	0.0558601	0.0492104	0.0919414	1.09238e-06	0.725871	0.854682	0.758415	alpha/beta-Hydrolases superfamily protein	-	1	-	-	-	1
AT3G20020.3	-0.384069	0.0585689	-0.367308	-0.177007	0.0339629	0.863031	0.260795	0.758249		1	-	-	-	-	1
AT1G11650.2	0.0984852	0.166274	-0.208968	-0.0532078	0.308536	0.0939006	0.00935756	0.758124	RNA-binding (RRM/RBD/RNP motifs) family protein	-	-	-	-	1	1
AT5G42250.1	-0.0778853	-0.917504	0.0172169	-0.394204	0.769023	1.43216e-06	0.989422	0.758074	Zinc-binding alcohol dehydrogenase family protein	-	-	-	1	-	1
AT5G05430.2	-2.58832	-4.45833	-3.43355	-0.717304	0.671534	0.517127	0.00374217	0.758074		-	1	-	-	-	1
AT4G17880.1	-1.00613	-0.632514	-0.731397	0.214863	7.80032e-07	0.00421518	0.0330682	0.757237	Basic helix-loop-helix (bHLH) DNA-binding family protein	1	-	-	-	-	1
AT4G38890.1	-0.61686	0.0167917	-0.531347	-0.185125	5.226e-07	0.952511	0.0828817	0.757023	FMN-linked oxidoreductases superfamily protein	-	-	-	1	-	1
AT4G36680.1	-0.58802	0.146546	-0.862634	-0.192822	0.00860859	0.688273	0.00198342	0.756868	Tetratricopeptide repeat (TPR)-like superfamily protein	-	1	-	-	-	1
AT1G13810.1	-0.691334	-0.0502997	-0.897357	-0.252125	0.0072784	0.919628	0.0241901	0.756562	Restriction endonuclease, type II-like superfamily protein	-	-	-	1	-	1
AT1G16270.1	0.353316	0.0760477	-0.131034	-0.11171	0.000495534	0.645663	0.60501	0.756312	Protein kinase superfamily protein with octicosapeptide/Phox/Bem1p domain	-	-	1	-	-	1
AT2G16850.1	-0.672434	0.162124	-0.142885	-0.217283	0.00012868	0.515639	0.813942	0.756286	plasma membrane intrinsic protein 2;8	-	1	-	-	-	1
AT2G01720.1	-0.221764	-0.0124122	-0.0876585	-0.111029	0.0421463	0.958287	0.764687	0.756032	Ribophorin I	-	1	-	-	-	1
AT2G19490.1	-0.950219	-0.11523	-1.17517	-0.330919	5.18757e-05	0.776602	0.0253242	0.755531	recA DNA recombination family protein	-	-	-	1	-	1
AT3G22270.1	0.842123	0.476134	0.247919	0.129695	6.59745e-11	0.000693604	0.311882	0.755347	Topoisomerase II-associated protein PAT1	1	-	-	-	-	1
AT5G46910.1	1.07032	-0.157229	0.656149	0.185542	3.18838e-11	0.552205	0.0190405	0.755347	Transcription factor jumonji (jmj) family protein / zinc finger (C5HC2 type) family protein	1	-	-	-	-	1
AT4G32690.1	0.179318	0.459106	0.298693	-0.257625	0.287204	0.00118335	0.616907	0.754687	hemoglobin 3	1	-	-	-	-	1
AT1G51170.1	0.541916	0.71054	-0.0700537	0.26002	0.03292	0.00565269	0.93479	0.753593	Protein kinase superfamily protein	1	-	-	-	-	1
AT5G41770.1	-0.0434007	0.119795	-0.391629	-0.103819	0.78696	0.478402	0.0121081	0.753593	crooked neck protein, putative / cell cycle protein, putative	-	-	-	-	1	1
AT5G14050.1	-0.580891	0.00485793	-1.13187	-0.199538	3.89887e-06	0.987723	3.72887e-05	0.753593	Transducin/WD40 repeat-like superfamily protein	-	-	-	1	-	1
AT2G02950.1	-1.3129	-1.73829	-0.00799697	0.274404	7.54209e-05	3.28983e-07	0.993636	0.75348	phytochrome kinase substrate 1	-	-	-	-	1	1
AT5G58610.3	-1.88949	-1.49012	-0.0889093	-0.609094	0.00622222	0.0346172	0.967096	0.75348		1	-	-	-	-	1
AT1G61800.2	4.74251	3.99276	-0.653122	0.483643	0.000309888	0.0110824	0.532461	0.752744		-	-	1	-	-	1
AT3G05480.3	-1.07004	0.0387055	-0.517695	-0.301617	0.00160225	0.956877	0.382262	0.752559	cell cycle checkpoint control protein family	-	-	-	-	1	1
AT1G71490.1	-1.23482	-0.0985181	0.0338575	-0.239435	0.000549522	0.889416	0.96818	0.752357	Tetratricopeptide repeat (TPR)-like superfamily protein	-	-	1	-	-	1
AT1G09870.1	0.82579	0.394237	0.529631	0.116346	3.51118e-12	0.00289044	0.00101537	0.75163	histidine acid phosphatase family protein	-	1	-	-	-	1
AT5G11520.1	1.64948	0.576731	0.967139	0.208798	5.51735e-18	0.00944218	0.00103584	0.751385	aspartate aminotransferase 3	-	1	-	-	-	1
AT3G06380.1	0.281997	-0.409249	0.282375	0.163112	0.160578	0.0499553	0.371218	0.751045	tubby-like protein 9	-	-	-	1	-	1
AT2G22690.1	1.09555	0.278058	0.772407	0.221447	2.23019e-08	0.318003	0.0228076	0.750808	zinc ion binding	-	-	-	1	-	1
AT3G52220.1	0.867377	0.255961	0.141315	-0.136262	2.05068e-09	0.18083	0.65845	0.750682		-	1	-	-	-	1
AT2G41810.1	-1.66986	3.97047	-1.40363	-3.08006	0.334681	0.0265071	0.869266	0.750366	Protein of unknown function, DUF642	-	-	1	-	-	1
AT3G17465.1	-0.182586	-0.032103	-0.664568	-0.201747	0.184455	0.898358	0.0330154	0.748683	ribosomal protein L3 plastid	-	1	-	-	-	1
AT1G70750.1	-0.655877	0.20513	-0.693968	-0.201484	0.00122115	0.483536	0.0258515	0.748447	Protein of unknown function, DUF593	-	1	-	-	-	1
AT1G54030.1	-1.00243	-0.0837124	-0.194443	0.174385	4.49439e-13	0.741848	0.624101	0.748281	GDSL-like Lipase/Acylhydrolase superfamily protein	-	-	-	1	-	1
AT1G24310.1	-0.489606	0.0306811	-0.767548	-0.164461	0.0281631	0.949732	0.000797266	0.748281		-	-	-	1	-	1
AT3G60750.1	-0.153958	0.327785	0.050579	0.148562	0.329816	0.0324033	0.912818	0.748023	Transketolase	-	-	-	-	1	1
AT3G05100.1	-0.549348	-0.166803	-0.13891	0.157697	4.22094e-05	0.360186	0.718791	0.747551	S-adenosyl-L-methionine-dependent methyltransferases superfamily protein	-	-	-	1	-	1
AT4G14510.1	-0.341305	0.168887	-0.63833	-0.203859	0.0892128	0.537621	0.0429254	0.746517	CRM family member 3B	-	-	1	-	-	1
AT3G51840.1	0.73155	0.0617333	0.536062	0.174235	7.06105e-06	0.851292	0.0481569	0.746508	acyl-CoA oxidase 4	-	1	-	-	-	1
AT4G16141.1	-0.547122	-0.0670439	-0.977045	-0.252149	2.22852e-05	0.76849	0.00821742	0.746197	GATA type zinc finger transcription factor family protein	-	-	-	1	-	1
AT2G34460.1	2.00262	0.899736	0.559305	0.199833	1.01389e-16	0.000850195	0.0825115	0.746108	NAD(P)-binding Rossmann-fold superfamily protein	-	1	-	-	-	1
AT1G15215.4	-0.617692	-0.146263	-0.12208	0.262395	0.0462269	0.769276	0.874508	0.745945		-	-	1	-	-	1
AT3G45100.1	0.0835498	-0.49175	0.0979539	0.158679	0.620548	0.000212345	0.822917	0.745873	UDP-Glycosyltransferase superfamily protein	-	-	-	-	1	1
AT3G14230.1	1.01264	0.74854	-0.401855	-0.209802	1.39224e-05	0.0031881	0.295817	0.74511	related to AP2 2	-	-	-	-	1	1
AT3G13980.1	-0.90385	0.556473	-0.0974856	0.352833	0.0141081	0.201833	0.930675	0.744166		-	1	-	-	-	1
AT3G55090.1	6.04048	0.0523257	4.28809	0.365473	1.15207e-20	0.975165	1.59483e-23	0.744166	ABC-2 type transporter family protein	-	1	-	-	-	1
AT5G59350.1	0.157763	0.47901	0.0443907	0.226766	0.497423	0.0141182	0.954212	0.743962		-	-	-	-	1	1
AT4G30230.1	-0.147698	-3.81081	-0.580351	-0.634363	0.947243	0.0340736	0.711267	0.743605		-	-	-	-	1	1
AT2G27590.1	-0.720262	-0.213822	-0.5554	-0.209529	0.000136199	0.414528	0.111266	0.74348	S-adenosyl-L-methionine-dependent methyltransferases superfamily protein	-	1	-	-	-	1
AT5G26150.2	5.26489	2.77593	-0.108173	1.33618	0.00140676	0.0436062	0.980022	0.742834		-	1	-	-	-	1
AT5G51260.1	1.28021	0.551896	0.587095	0.227339	2.75798e-16	0.00158034	0.106339	0.742834	HAD superfamily, subfamily IIIB acid phosphatase	-	1	-	-	-	1
AT3G61180.1	-0.268997	-0.407226	0.242273	0.152713	0.0975322	0.012842	0.417534	0.742585	RING/U-box superfamily protein	1	-	-	-	-	1
AT1G72125.1	-0.110298	-0.624393	2.04031	0.918321	0.682058	0.00513105	0.202452	0.742423	Major facilitator superfamily protein	-	-	-	1	-	1
AT5G46140.1	-6.2871	0.480963	-4.32509	1.04402	3.91264e-05	0.759663	0.0543184	0.740977	Protein of unknown function (DUF295)	-	-	-	-	1	1
AT5G01970.1	-0.0265491	-0.379875	0.0822481	-0.204791	0.904046	0.0123662	0.893284	0.740778		-	-	-	1	-	1
AT5G59840.1	1.59964	0.301959	0.695439	0.132822	6.36722e-65	0.00727788	6.53843e-05	0.740536	Ras-related small GTP-binding family protein	-	1	-	-	-	1
AT1G71830.1	-0.930953	-0.0801635	-0.496253	-0.155573	2.83956e-07	0.813124	0.0351175	0.740405	somatic embryogenesis receptor-like kinase 1	-	-	-	1	-	1
AT5G47870.1	0.676556	-0.349937	0.132747	-0.188862	0.00173916	0.208614	0.786928	0.740106		-	-	-	-	1	1
AT1G05470.1	-1.74422	-1.12664	-0.527002	-0.221987	4.22201e-09	0.000292931	0.153862	0.739601	DNAse I-like superfamily protein	-	-	-	-	1	1
AT3G08870.2	2.05151	1.84104	1.09739	0.88336	0.0198568	0.0454047	0.560586	0.739521		-	-	-	1	-	1
AT1G68790.1	-0.220226	0.0985474	-0.565723	-0.134857	0.211651	0.714046	0.00267948	0.739521	little nuclei3	1	-	-	-	-	1
AT5G44635.2	-0.657547	-0.0813345	-0.474665	-0.27903	0.000153663	0.795355	0.361462	0.739007		-	-	1	-	-	1
AT5G52570.1	8.37629	2.71395	0.14051	-0.252564	5.10575e-07	0.0659527	0.837254	0.738295	beta-carotene hydroxylase 2	-	1	-	-	-	1
AT4G35860.1	1.33067	0.418257	0.598031	0.14856	4.82994e-41	0.000145504	0.00381364	0.73717	GTP-binding 2	1	-	-	-	-	1
AT3G48760.1	0.614573	0.245179	0.41175	0.165787	4.91112e-07	0.106241	0.123189	0.736643	DHHC-type zinc finger family protein	-	-	-	-	1	1
AT4G33560.1	3.65026	2.42316	-0.0603893	-0.422931	4.31642e-11	1.3562e-05	0.966507	0.736114	Wound-responsive family protein	-	1	-	-	-	1
AT4G10510.3	0.654121	-3.2061	0.895023	-3.17575	0.571891	0.00113391	0.925358	0.736114		-	-	1	-	-	1
AT3G62630.1	-0.312565	-0.179523	0.0935159	0.235418	0.0194154	0.285756	0.89307	0.736114	Protein of unknown function (DUF1645)	1	-	-	-	-	1
AT3G07195.2	-2.1736	-2.94613	-0.877126	-1.71032	4.99813e-05	5.21409e-08	0.851994	0.736114		-	-	-	-	1	1
AT2G01910.1	-0.346136	-0.220376	-0.0860286	0.152968	0.0138937	0.20267	0.836809	0.736114	Microtubule associated protein (MAP65/ASE1) family protein	-	-	-	-	1	1
AT1G14830.1	0.286841	0.0601344	0.0854469	-0.102769	0.000335856	0.64759	0.728255	0.736114	DYNAMIN-like 1C	1	-	-	-	-	1
AT4G31570.1	0.34448	0.193936	0.108347	0.101596	0.0141283	0.286916	0.630088	0.736114		-	-	1	-	-	1
AT4G32330.1	-0.70177	-0.208916	-0.205398	-0.179399	2.03547e-06	0.306546	0.593462	0.736114	TPX2 (targeting protein for Xklp2) protein family	1	-	-	-	-	1
AT1G78140.1	0.942682	0.0720486	0.321104	0.229557	1.39204e-10	0.796695	0.48359	0.736114	S-adenosyl-L-methionine-dependent methyltransferases superfamily protein	-	1	-	-	-	1
AT3G60670.1	1.91063	1.74435	0.943395	0.538792	0.00245102	0.0129409	0.304509	0.736114	PLATZ transcription factor family protein	1	-	-	-	-	1
AT5G22510.1	0.492743	0.290218	0.415991	0.192219	4.68996e-07	0.00544418	0.200436	0.736114	alkaline/neutral invertase	-	1	-	-	-	1
AT1G16970.1	-0.47646	-0.161605	-0.464932	-0.188427	3.15615e-06	0.197292	0.126198	0.736114	KU70 homolog	-	1	-	-	-	1
AT4G09490.1	1.11008	1.7816	0.841924	0.328374	0.00902375	8.08992e-06	0.116273	0.736114	Polynucleotidyl transferase, ribonuclease H-like superfamily protein	1	-	-	-	-	1
AT3G63130.1	-0.365334	-0.0530387	-0.482868	-0.157036	0.0019321	0.804954	0.0395395	0.736114	RAN GTPase activating protein 1	-	1	-	-	-	1
AT5G06350.1	-0.242904	0.0702893	-0.432431	0.122554	0.0673262	0.736054	0.0155846	0.736114	ARM repeat superfamily protein	-	-	-	-	1	1
AT4G05410.1	-0.830857	0.192865	-1.24638	-0.220167	2.30997e-05	0.517032	1.42946e-05	0.736114	Transducin/WD40 repeat-like superfamily protein	1	-	-	-	-	1
AT1G28390.2	-0.684762	-0.507088	-0.0993789	-0.381269	0.000298178	0.0123662	0.933312	0.736046	Protein kinase superfamily protein	-	1	-	-	-	1
AT1G65470.1	-0.497007	-0.0649608	-0.188845	-0.275022	0.00180912	0.824406	0.787695	0.734827	chromatin assembly factor-1 (FASCIATA1) (FAS1)	-	-	1	-	-	1
AT5G63260.2	0.393908	0.233761	0.166744	0.181934	0.00104865	0.0995894	0.687726	0.734827	Zinc finger C-x8-C-x5-C-x3-H type family protein	-	-	1	-	-	1
AT1G61065.1	0.689133	0.788891	0.81413	0.763561	0.0789939	0.040542	0.626638	0.734827	Protein of unknown function (DUF1218)	-	1	-	-	-	1
AT3G54780.4	-1.48882	0.373514	-0.909612	0.270718	1.04034e-05	0.417876	0.0373126	0.734542		-	-	-	-	1	1
AT1G04820.1	-0.275392	-0.00161286	-0.142004	-0.241084	0.049391	0.995509	0.825275	0.734408	tubulin alpha-4 chain	-	1	-	-	-	1
AT4G12880.1	-0.834679	-0.488443	-0.221167	0.21574	0.00027412	0.0707558	0.644975	0.734408	early nodulin-like protein 19	-	-	1	-	-	1
AT2G44180.1	-0.642244	-0.557459	-0.121924	-0.233558	1.71723e-05	0.000265103	0.849681	0.733977	methionine aminopeptidase 2A	-	-	-	-	1	1
AT5G49290.2	-1.78276	-1.33336	0.425631	0.401954	0.000387465	0.0105164	0.625362	0.733977		-	-	1	-	-	1
AT4G01600.1	0.461198	1.45708	0.415163	0.442251	0.363714	0.000746635	0.68607	0.7338	GRAM domain family protein	-	-	-	1	-	1
AT5G54970.1	-0.296839	0.490917	-0.215994	-0.224814	0.230833	0.0485834	0.665007	0.733627		-	1	-	-	-	1
AT4G00380.1	-0.99524	-0.739233	-0.282988	0.212746	6.30807e-05	0.00442382	0.512548	0.733494	XH/XS domain-containing protein	1	-	-	-	-	1
AT5G37450.2	-5.78734	-9.12256	-2.47909	-3.85894	8.97202e-08	8.83646e-11	NA	0.733455		-	-	1	-	-	1
AT1G35780.1	0.165412	0.420908	0.192622	0.144126	0.195006	0.000203617	0.504217	0.733455		-	1	-	-	-	1
AT5G27990.1	-0.620204	-0.111158	-0.781281	-0.255177	1.41385e-05	0.621136	0.0397218	0.733345	Pre-rRNA-processing protein TSR2, conserved region	-	-	1	-	-	1
AT1G17147.1	-1.08115	-1.53945	0.00389827	-0.407441	0.0762688	0.0132848	0.998136	0.733333	VQ motif-containing protein	-	1	-	-	-	1
AT4G17410.2	0.47176	0.147074	-0.196121	-0.140959	0.000202198	0.418378	0.486875	0.733333	DWNN domain, a CCHC-type zinc finger	-	-	1	-	-	1
AT1G20010.1	-1.00007	-0.838236	-0.509701	-0.338834	9.99603e-13	6.47044e-09	0.430149	0.733333	tubulin beta-5 chain	-	-	1	-	-	1
AT5G22830.1	1.21285	0.579191	0.209799	0.118449	4.98599e-11	0.00491029	0.319901	0.733333	magnesium (Mg) transporter 10	-	1	-	-	-	1
AT5G22780.1	-0.321953	-0.031001	-0.402907	-0.127246	0.0100631	0.903354	0.0305104	0.733333	Adaptor protein complex AP-2, alpha subunit	-	-	1	-	-	1
AT2G31840.1	-0.819963	-0.243817	-0.188687	-0.271067	0.00261168	0.521461	0.78237	0.733242	Thioredoxin superfamily protein	-	1	-	-	-	1
AT3G10370.1	1.10318	0.535191	0.619162	0.10357	4.41216e-15	0.000595131	1.28439e-06	0.732013	FAD-dependent oxidoreductase family protein	-	-	1	-	-	1
AT3G56290.1	0.476275	-0.269544	-0.138495	-0.21528	0.0323943	0.37217	0.802728	0.731695		-	1	-	-	-	1
AT4G22756.1	-0.988239	-0.565935	0.0407012	0.173052	9.91105e-08	0.00416577	0.939224	0.731584	sterol C4-methyl oxidase 1-2	-	1	-	-	-	1
AT1G30860.1	0.863705	0.453495	0.834182	0.399152	0.0371596	0.416452	0.231793	0.731478	RING/U-box superfamily protein	-	1	-	-	-	1
AT2G38340.1	3.3666	2.79712	1.84582	0.69948	3.95506e-05	0.00153311	0.063667	0.729842	Integrase-type DNA-binding superfamily protein	-	1	-	-	-	1
AT4G13040.3	0.821595	-0.0169272	0.146849	-0.324441	0.0012368	0.97878	0.867658	0.729534	Integrase-type DNA-binding superfamily protein	-	-	1	-	-	1
AT3G15110.1	-0.25601	0.666081	0.107309	-0.234074	0.417689	0.0132646	0.86573	0.729448		-	-	-	1	-	1
AT3G55550.1	-3.17915	-0.850963	-2.20414	-2.0589	4.41773e-05	0.243483	NA	0.728761	Concanavalin A-like lectin protein kinase family protein	-	-	-	1	-	1
AT5G66110.1	9.14925	4.39057	1.17677	0.516772	6.33308e-11	1.01136e-06	0.162978	0.728701	Heavy metal transport/detoxification superfamily protein	-	-	-	-	1	1
AT3G48190.2	-0.599058	-0.135287	-0.360425	0.146227	0.00181323	0.660547	0.114978	0.728341		-	-	1	-	-	1
AT1G09830.1	-0.926042	-0.0459552	-0.81483	-0.195809	5.05982e-08	0.896928	0.00173949	0.726717	Glycinamide ribonucleotide (GAR) synthetase	1	-	-	-	-	1
AT5G67270.1	-0.585104	0.294896	-0.151958	-0.224848	0.00311259	0.232424	0.78734	0.726424	end binding protein 1C	1	-	-	-	-	1
AT5G54580.1	-0.582994	0.0315866	-0.0703224	-0.187234	0.000201221	0.924549	0.896883	0.726208	RNA-binding (RRM/RBD/RNP motifs) family protein	-	-	-	-	1	1
AT5G03990.1	0.589029	0.0580483	-0.266716	0.273915	0.0332679	0.919186	0.663483	0.726208		1	-	-	-	-	1
AT1G07310.1	0.527936	0.263925	0.184016	0.149202	1.24284e-05	0.0648878	0.536634	0.726208	Calcium-dependent lipid-binding (CaLB domain) family protein	-	-	1	-	-	1
AT2G27050.1	0.969019	0.215379	-0.173429	-0.147163	4.4237e-11	0.301945	0.563312	0.724898	ETHYLENE-INSENSITIVE3-like 1	-	-	1	-	-	1
AT1G13110.1	-0.956591	-1.30088	-0.721661	-0.452723	0.0499595	0.00988176	0.379291	0.724741	cytochrome P450, family 71 subfamily B, polypeptide 7	-	-	-	1	-	1
AT1G34110.1	-0.449946	-0.0788991	-0.282584	-0.166234	0.00371678	0.769911	0.343417	0.724739	Leucine-rich receptor-like protein kinase family protein	-	-	1	-	-	1
AT3G03140.1	0.37893	0.252311	0.0225177	-0.160975	0.00406038	0.0982822	0.966149	0.724018	Tudor/PWWP/MBT superfamily protein	-	-	-	-	1	1
AT2G35260.1	-1.73217	0.865358	-0.201671	0.223941	0.00200002	0.175693	0.685214	0.724018		-	1	-	-	-	1
AT3G28210.1	1.95592	0.923193	2.10621	0.786659	0.0202837	0.43813	0.0595869	0.724018	zinc finger (AN1-like) family protein	-	-	1	-	-	1
AT4G35450.5	0.783922	0.437659	0.11189	-0.141108	1.5522e-10	0.00111285	0.733432	0.723016	ankyrin repeat-containing protein 2	-	1	-	-	-	1
AT4G31350.1	-0.753174	0.0171602	-0.424629	-0.206508	1.24163e-05	0.964474	0.220483	0.722965	Core-2/I-branching beta-1,6-N-acetylglucosaminyltransferase family protein	-	-	-	1	-	1
AT2G40420.1	0.758881	0.25969	0.812699	0.313084	0.0125021	0.569093	0.0870351	0.722948	Transmembrane amino acid transporter family protein	-	1	-	-	-	1
AT2G15270.1	0.382308	-0.157998	0.116939	-0.217156	0.0178258	0.488505	0.836908	0.722385		-	-	-	-	1	1
AT2G24990.1	-0.535083	0.142334	-0.765231	-0.196858	0.00051181	0.537593	0.0041291	0.722385	Serine/threonine-protein kinase Rio1	-	-	1	-	-	1
AT3G59820.2	-0.0155903	0.618103	-0.25769	0.380311	0.976109	0.0116071	0.782935	0.722069	LETM1-like protein	-	-	1	-	-	1
AT5G20885.1	0.600454	-0.0705991	-0.0463693	-0.165135	9.86978e-06	0.777639	0.925149	0.721642	RING/U-box superfamily protein	-	-	1	-	-	1
AT1G64600.1	-0.706509	-0.247662	-1.13341	-0.300694	0.00134713	0.414218	0.00542152	0.721547	methyltransferases;copper ion binding	-	1	-	-	-	1
AT5G54165.1	4.53147	2.83743	4.15012	0.846417	7.06064e-13	7.56888e-05	5.60246e-05	0.721547		-	1	-	-	-	1
AT5G42020.3	-0.566385	0.141556	-0.633901	-0.400432	0.000340285	0.569008	0.376354	0.721103		-	1	-	-	-	1
AT1G67630.1	-0.388974	-0.164036	-0.402172	-0.248143	0.0303069	0.5169	0.355255	0.720983	DNA polymerase alpha 2	-	-	1	-	-	1
AT3G13437.2	-3.79111	-1.68493	0.284898	0.675988	5.23065e-05	0.00472272	0.879468	0.720765		-	1	-	-	-	1
AT3G62400.2	0.0543438	-0.394672	0.153098	-0.25685	0.822767	0.0422218	0.814676	0.720336		-	-	-	1	-	1
AT5G58970.1	0.0709867	0.720088	0.340819	0.240892	0.798477	0.000210549	0.448288	0.719598	uncoupling protein 2	-	1	-	-	-	1
AT1G77930.1	0.52997	0.0311293	0.333366	0.168355	0.00260176	0.933791	0.230372	0.719534	Chaperone DnaJ-domain superfamily protein	-	-	-	-	1	1
AT5G61650.1	1.35813	2.27886	3.37099	4.00306	0.110799	0.00697147	NA	0.719196	CYCLIN P4;2	1	-	-	-	-	1
AT2G40960.1	0.625566	0.187357	0.641453	-0.182529	0.00504883	0.5754	0.00774731	0.718257	Single-stranded nucleic acid binding R3H protein	-	-	-	1	-	1
AT2G36420.1	0.700983	0.33736	0.215788	0.187837	0.0173856	0.405044	0.565453	0.718253		-	1	-	-	-	1
AT5G27120.1	-0.715709	0.175549	-1.68153	-0.244629	8.36146e-10	0.275466	7.90212e-09	0.718048	NOP56-like pre RNA processing ribonucleoprotein	-	-	-	-	1	1
AT2G43600.2	-0.347066	-0.834964	-2.88351	-3.34374	0.363896	0.0230716	NA	0.717922		-	-	1	-	-	1
AT3G20150.1	-0.551202	0.0305009	-0.127651	-0.231875	0.00247773	0.939951	0.829947	0.717915	Kinesin motor family protein	-	-	1	-	-	1
AT5G24450.1	0.384192	0.147333	0.182983	0.132169	0.000875281	0.342279	0.460755	0.717906	Transcription factor IIIC, subunit 5	-	-	1	-	-	1
AT1G15440.1	-0.622942	-0.0275242	-1.09203	-0.202603	3.89072e-05	0.935766	1.17416e-05	0.716475	periodic tryptophan protein 2	1	-	-	-	-	1
AT2G23360.1	0.703371	0.966973	0.0661396	0.141747	2.6293e-05	2.25137e-09	0.858521	0.716051	Plant protein of unknown function (DUF869)	-	1	-	-	-	1
AT4G30120.1	-1.69477	-3.98333	2.78934	-4.02339	0.0353845	1.37743e-05	NA	0.715961	heavy metal atpase 3	-	-	1	-	-	1
AT5G40960.1	1.89924	1.53832	0.812853	0.427174	6.47371e-08	1.15751e-05	0.244954	0.715822	Protein of unknown function (DUF 3339)	-	-	-	-	1	1
AT1G27000.1	0.398282	0.135785	0.158239	0.176585	2.58789e-05	0.290054	0.679025	0.713903	Protein of unknown function (DUF1664)	-	1	-	-	-	1
AT1G44110.1	-1.14367	0.0870372	-0.382548	-0.248012	9.90541e-09	0.797723	0.382548	0.71382	Cyclin A1;1	-	1	-	-	-	1
AT1G79760.2	-1.9298	-1.79284	-1.81306	-0.497976	1.4787e-07	1.21337e-06	0.0106419	0.71382		-	1	-	-	-	1
AT3G13550.1	0.574837	-0.0436204	0.172066	-0.229833	0.00826083	0.926041	0.741994	0.713412	Ubiquitin-conjugating enzyme family protein	-	1	-	-	-	1
AT2G30100.1	-1.47178	-0.453487	-0.424005	0.215638	8.75808e-08	0.186259	0.221317	0.713065	pentatricopeptide (PPR) repeat-containing protein	-	1	-	-	-	1
AT4G10030.1	0.453301	-0.196052	0.153521	0.141493	0.000601452	0.271935	0.588873	0.712906	alpha/beta-Hydrolases superfamily protein	1	-	-	-	-	1
AT1G52880.1	1.34881	0.433807	0.651481	0.287968	1.07478e-06	0.227122	0.14461	0.711716	NAC (No Apical Meristem) domain transcriptional regulator superfamily protein	1	-	-	-	-	1
AT2G24230.1	-0.12806	0.487533	0.210722	0.168877	0.548889	0.00579583	0.514099	0.711684	Leucine-rich repeat protein kinase family protein	1	-	-	-	-	1
AT5G05380.2	0.637403	0.175055	0.506369	0.302066	0.00603076	0.635745	0.312801	0.711025		-	-	1	-	-	1
AT1G14900.1	-0.549223	-0.0461112	-0.0411329	-0.180511	0.00453743	0.908158	0.93803	0.709974	high mobility group A	-	1	-	-	-	1
AT2G32690.1	0.816946	1.94787	0.615599	0.222884	0.159517	0.000374095	0.0515116	0.709974	glycine-rich protein 23	-	-	-	1	-	1
AT2G22930.1	1.17322	1.20841	0.631691	0.588408	8.65935e-09	5.01558e-09	0.58748	0.709758	UDP-Glycosyltransferase superfamily protein	-	-	1	-	-	1
AT3G54890.1	-1.78239	1.10159	0.116238	-0.181418	0.0170454	0.243182	0.789922	0.709311	photosystem I light harvesting complex gene 1	-	1	-	-	-	1
AT3G22950.1	0.535586	-0.00750859	0.0849265	-0.221347	0.00181353	0.98581	0.887473	0.708529	ADP-ribosylation factor C1	-	1	-	-	-	1
AT2G22920.2	-0.360957	1.08895	-1.39303	0.815671	0.113809	4.32359e-08	0.326824	0.708529	serine carboxypeptidase-like 12	-	-	1	-	-	1
AT2G20780.1	-0.67246	-0.359751	-0.190538	-0.263724	1.93551e-09	0.00282138	0.752683	0.708101	Major facilitator superfamily protein	-	1	-	-	-	1
AT4G27030.1	0.170109	-0.697814	-0.207102	-0.259247	0.590917	0.0132294	0.717036	0.708101	fatty acid desaturase A	-	-	1	-	-	1
AT2G40390.1	1.05549	1.01798	-0.466255	-0.389751	4.57565e-05	6.91024e-05	0.549279	0.708101		-	-	-	1	-	1
AT5G13700.1	2.61484	1.01669	2.46874	0.459081	1.04545e-11	0.0219367	1.48033e-05	0.708101	polyamine oxidase 1	-	-	1	-	-	1
AT5G14310.1	0.446722	-0.080464	0.113621	-0.199844	0.00220712	0.754595	0.817434	0.706686	carboxyesterase 16	1	-	-	-	-	1
AT3G62660.1	1.71936	0.783401	0.297109	0.252253	5.76e-17	0.000579813	0.538903	0.706686	galacturonosyltransferase-like 7	-	-	-	-	1	1
AT3G02460.1	0.359972	-0.294629	0.543582	0.205625	0.0135606	0.0745346	0.0639311	0.706686	Ypt/Rab-GAP domain of gyp1p superfamily protein	-	-	-	1	-	1
AT2G03800.2	0.36743	0.00679913	0.00919507	-0.228341	0.0422842	0.987264	0.988721	0.705655		-	-	-	-	1	1
AT4G10590.1	0.742254	0.30351	0.277763	0.146891	8.22232e-14	0.00771556	0.233303	0.704625	ubiquitin-specific protease 10	-	-	1	-	-	1
AT3G03670.1	-3.84911	-8.72156	-3.46717	-4.12717	0.0148406	7.03589e-06	0.69616	0.704178	Peroxidase superfamily protein	-	-	-	1	-	1
AT3G59200.1	-0.584995	-0.0806256	-0.441457	0.618692	0.0429966	0.878223	0.750057	0.703651	F-box/RNI-like superfamily protein	1	-	-	-	-	1
AT4G08250.1	1.3631	0.406391	0.132475	-0.651283	0.0128844	0.617888	0.945459	0.703606	GRAS family transcription factor	-	1	-	-	-	1
AT1G32750.1	0.431955	0.137182	-0.140131	0.144937	1.65552e-06	0.261481	0.637301	0.703606	HAC13 protein (HAC13)	-	-	1	-	-	1
AT1G54710.1	1.52688	0.421488	0.751366	0.204113	1.99391e-63	2.76348e-05	0.00384521	0.702722	homolog of yeast autophagy 18 (ATG18) H	-	-	-	-	1	1
AT5G39410.1	0.453627	0.51683	0.377537	0.410306	0.0116042	0.00574548	0.656018	0.701514	Saccharopine dehydrogenase	-	1	-	-	-	1
AT1G08800.1	-0.166339	-0.0748734	-0.774462	-0.274073	0.206388	0.70673	0.0421823	0.701271	Protein of unknown function, DUF593	-	1	-	-	-	1
AT3G05920.1	0.330143	-0.141869	0.24375	-1.17186	0.0197456	0.484749	0.940514	0.700682	Heavy metal transport/detoxification superfamily protein	-	-	-	-	1	1
AT3G15080.1	-0.726036	0.12492	-1.09693	-0.223236	2.66009e-06	0.591764	5.24616e-05	0.699866	Polynucleotidyl transferase, ribonuclease H-like superfamily protein	-	-	-	1	-	1
AT2G24130.2	3.2073	3.26392	4.55014	2.47266	1.36496e-05	1.10821e-05	0.261653	0.699654		-	1	-	-	-	1
AT1G75080.1	-0.560193	-0.218179	-0.0479157	-0.154246	0.00017974	0.260233	0.909495	0.699581	Brassinosteroid signalling positive regulator (BZR1) family protein	-	1	-	-	-	1
AT5G44750.2	-0.562318	-0.468998	-0.158254	0.169202	0.0301175	0.118851	0.650154	0.699581	DNA-directed DNA polymerases	-	-	1	-	-	1
AT1G80320.1	0.597671	0.159025	0.0842796	0.433985	0.0183142	0.683246	0.946243	0.699073	2-oxoglutarate (2OG) and Fe(II)-dependent oxygenase superfamily protein	-	-	-	-	1	1
AT4G27910.1	0.519155	-0.0188616	-0.0774805	-0.149907	1.328e-05	0.946003	0.835151	0.699073	SET domain protein 16	-	-	1	-	-	1
AT5G03280.1	-0.248532	-0.00915093	0.152148	0.180443	0.0397841	0.973562	0.688874	0.699073	NRAMP metal ion transporter family protein	-	-	-	1	-	1
AT4G11530.1	-1.72607	-1.47289	-0.743988	-0.608726	7.31255e-10	9.26693e-08	0.51751	0.698892	cysteine-rich RLK (RECEPTOR-like protein kinase) 34	-	-	-	-	1	1
AT3G20650.1	0.377074	0.00595403	-0.224863	-0.136555	0.00326473	0.984788	0.319606	0.698581	mRNA capping enzyme family protein	-	-	-	1	-	1
AT4G01770.2	-1.63799	-1.41786	-0.826614	-2.33057	4.13543e-10	1.16795e-07	0.866516	0.69776		-	-	-	-	1	1
AT5G01370.1	-0.998529	-0.1256	-0.144852	0.26124	0.0116107	0.867919	0.820383	0.69776	ALC-interacting protein 1	-	-	-	1	-	1
AT3G05410.2	-1.0165	-0.267285	-0.229085	-0.284277	0.0018115	0.529534	0.707712	0.69776	Photosystem II reaction center PsbP family protein	-	-	1	-	-	1
AT2G47180.1	2.00164	1.21467	1.19153	0.586731	6.5997e-07	0.00676471	0.184255	0.69776	galactinol synthase 1	-	1	-	-	-	1
AT5G10580.3	-0.782117	-0.184276	-1.28262	-0.524762	0.0044038	0.684139	0.0917598	0.697352		-	1	-	-	-	1
AT4G24510.1	2.90388	2.80993	1.35755	-0.247972	3.92497e-09	8.36552e-08	2.37176e-06	0.697104	HXXXD-type acyl-transferase family protein	-	1	-	-	-	1
AT1G66400.1	1.61426	0.234753	0.4092	-0.467175	2.76969e-06	0.690399	0.678426	0.696619	calmodulin like 23	-	-	-	1	-	1
AT5G23070.1	0.0536164	0.1533	-0.961293	-0.270342	0.844303	0.587871	0.00519244	0.696619	Thymidine kinase	-	1	-	-	-	1
AT3G55510.1	-0.883793	0.144503	-1.18141	-0.271413	5.65069e-09	0.536447	0.000401791	0.696343	Noc2p family	1	-	-	-	-	1
AT1G78780.3	0.0878541	1.87566	0.144295	0.714361	0.891492	2.83588e-06	0.947978	0.696098	pathogenesis-related family protein	-	-	-	-	1	1
AT3G18600.1	-0.700885	0.104196	-1.32482	-0.259533	4.03051e-07	0.652772	1.6233e-05	0.696098	P-loop containing nucleoside triphosphate hydrolases superfamily protein	1	-	-	-	-	1
AT1G72300.1	-1.77469	-1.40511	-0.572514	-0.277161	3.60402e-13	2.5141e-08	0.170573	0.696017	Leucine-rich receptor-like protein kinase family protein	-	-	1	-	-	1
AT1G07640.3	1.03788	0.913729	0.4307	0.210608	3.39511e-09	3.90121e-07	0.177069	0.695586	Dof-type zinc finger DNA-binding family protein	-	-	-	1	-	1
AT1G05220.1	-0.301693	-0.863239	0.0551941	-4.14726	0.458519	0.0181383	NA	0.695251	Transmembrane protein 97, predicted	-	1	-	-	-	1
AT1G68540.1	0.415668	0.753061	0.837816	0.341937	0.28802	0.040628	0.0894372	0.695162	NAD(P)-binding Rossmann-fold superfamily protein	-	-	-	1	-	1
AT5G54940.1	1.57253	0.604587	0.254912	0.220686	1.1167e-11	0.0276389	0.538426	0.694736	Translation initiation factor SUI1 family protein	-	1	-	-	-	1
AT5G16070.1	-0.373132	-0.109042	-0.590621	-0.172161	0.000277195	0.470356	0.0072999	0.693751	TCP-1/cpn60 chaperonin family protein	1	-	-	-	-	1
AT3G46970.1	0.204564	0.723783	-0.188797	0.542747	0.402645	0.000583683	0.896718	0.693394	alpha-glucan phosphorylase 2	-	-	1	-	-	1
AT3G11020.1	3.16352	1.96017	0.72391	0.623244	6.74456e-12	4.98107e-05	0.525614	0.693382	DRE/CRT-binding protein 2B	-	1	-	-	-	1
AT1G54360.6	-0.81716	-0.15943	-0.242431	0.155673	8.44731e-12	0.339524	0.349251	0.692753		-	-	1	-	-	1
AT3G58690.1	-0.663084	-0.0976266	0.0640599	0.329822	0.00307517	0.782463	0.946965	0.692548	Protein kinase superfamily protein	-	-	-	-	1	1
AT2G39340.1	0.360621	-0.172528	-0.00797449	0.115702	0.00546739	0.321022	0.9812	0.692093	SAC3/GANP/Nin1/mts3/eIF-3 p25 family	-	-	-	-	1	1
AT5G41570.1	3.74165	1.24192	7.70121	1.39558	2.48662e-14	0.0362265	1.62254e-05	0.690595	WRKY DNA-binding protein 24	-	1	-	-	-	1
AT2G45510.1	-0.965127	-0.0633781	-0.175374	0.506054	7.12277e-06	0.886911	0.896883	0.689862	cytochrome P450, family 704, subfamily A, polypeptide 2	1	-	-	-	-	1
AT5G47710.1	-0.834146	-0.194062	-0.0809301	0.174755	0.00150332	0.632177	0.853618	0.689434	Calcium-dependent lipid-binding (CaLB domain) family protein	-	-	1	-	-	1
AT3G62240.1	0.294663	0.0203362	-0.0260045	0.102224	0.00726161	0.932346	0.925876	0.689373	RING/U-box superfamily protein	-	-	1	-	-	1
AT3G12950.1	-0.39729	0.0674906	-0.218387	-0.209287	0.00606241	0.790878	0.589616	0.689307	Trypsin family protein	1	-	-	-	-	1
AT3G21110.1	-0.310398	0.180269	-0.449686	-0.221946	0.0367012	0.326784	0.172613	0.689267	purin 7	-	1	-	-	-	1
AT4G02700.1	1.81983	2.51166	0.0211246	-0.520636	0.00172881	1.16051e-05	0.988151	0.689174	sulfate transporter 3;2	-	-	1	-	-	1
AT4G34030.1	0.298293	0.12279	0.461238	0.193861	0.0317455	0.53868	0.0906143	0.689174	3-methylcrotonyl-CoA carboxylase	-	-	-	-	1	1
AT2G44670.1	2.11043	1.46036	-0.173669	-0.19381	3.7137e-23	2.53913e-11	0.661702	0.688965	Protein of unknown function (DUF581)	1	-	-	-	-	1
AT2G46890.1	-1.52903	-1.04583	-0.853756	-0.309578	1.30332e-08	0.000229219	0.0436839	0.688815	Protein of unknown function (DUF1295)	-	-	-	1	-	1
AT2G05580.1	4.22119	-4.94228	0.0551943	4.26876	0.0110607	0.00903996	NA	0.688757	Glycine-rich protein family	-	1	-	-	-	1
AT4G24620.1	-0.256434	-0.0604209	-0.111819	0.108041	0.011685	0.723443	0.587727	0.687227	phosphoglucose isomerase 1	-	-	1	-	-	1
AT3G29410.1	-1.38542	-3.26335	-2.36749	-1.2952	0.283429	0.00755018	0.225714	0.686724	Terpenoid cyclases/Protein prenyltransferases superfamily protein	-	-	-	-	1	1
AT5G08420.1	-0.331708	0.0649769	-0.368616	-0.167467	0.0112404	0.773799	0.124762	0.686422	RNA-binding KH domain-containing protein	-	-	-	1	-	1
AT3G23760.1	-1.5051	-2.5196	0.104296	-0.272872	0.213983	0.0491489	0.88109	0.686063		1	-	-	-	-	1
AT3G19970.1	0.686927	0.145996	0.520452	-0.339983	0.000212282	0.632284	0.34451	0.68604	alpha/beta-Hydrolases superfamily protein	1	-	-	-	-	1
AT2G33080.1	4.03701	3.4524	3.50156	1.50064	0.00207891	0.00471612	0.149329	0.68604	receptor like protein 28	-	1	-	-	-	1
AT1G35560.1	-2.07965	-0.664792	-0.472584	0.23038	4.04431e-21	0.00332729	0.165838	0.68587	TCP family transcription factor	-	-	-	1	-	1
AT1G13970.1	0.874357	0.132811	1.38434	0.620321	1.65432e-08	0.598424	0.127193	0.685733	Protein of unknown function (DUF1336)	-	-	-	-	1	1
AT4G25230.1	0.636359	0.373317	0.309621	0.210205	0.000195971	0.0633809	0.374697	0.685449	RPM1 interacting protein 2	-	-	1	-	-	1
AT1G51570.1	-0.24428	-0.0631539	-0.162608	-0.153843	0.00451387	0.638291	0.573569	0.68532	Calcium-dependent lipid-binding (CaLB domain) plant phosphoribosyltransferase family protein	-	-	1	-	-	1
AT3G59360.1	0.0420261	0.219698	-0.198195	-0.113739	0.752852	0.0444666	0.261653	0.68532	UDP-galactose transporter 6	-	-	1	-	-	1
AT2G17120.1	0.466071	0.0275355	1.04651	0.545039	0.00646053	0.942748	0.198903	0.68532	lysm domain GPI-anchored protein 2 precursor	-	-	1	-	-	1
AT1G19240.1	-0.480339	-0.454911	-0.238486	-0.264669	0.0474883	0.0838759	0.651352	0.685304		-	-	-	1	-	1
AT1G30600.1	-0.451997	0.00179462	-0.196941	-0.160989	0.0262023	0.996157	0.487847	0.685034	Subtilase family protein	1	-	-	-	-	1
AT3G51460.1	0.374985	0.232841	0.346103	0.114815	0.000383129	0.0577665	0.018752	0.685034	Phosphoinositide phosphatase family protein	-	-	1	-	-	1
AT1G75660.1	0.490883	-0.0860109	-0.0612626	-0.103052	5.65142e-07	0.589983	0.794468	0.684782	5'-3' exoribonuclease 3	-	-	1	-	-	1
AT1G73100.1	-0.331151	-0.119754	-0.238124	-0.165922	0.00711037	0.493746	0.388651	0.684361	SU(VAR)3-9 homolog 3	-	1	-	-	-	1
AT3G09740.1	0.00540465	-0.207848	0.146683	-0.108683	0.971765	0.00415584	0.425609	0.684098	syntaxin of plants 71	-	-	-	1	-	1
AT4G11210.1	-1.74171	-1.01608	-1.48252	-0.769376	1.67544e-06	0.0124286	0.168787	0.684098	Disease resistance-responsive (dirigent-like protein) family protein	-	-	1	-	-	1
AT5G52920.1	0.0185197	-0.278207	-0.186027	-0.196935	0.866528	0.000243607	0.627127	0.683665	plastidic pyruvate kinase beta subunit 1	-	-	1	-	-	1
AT1G71210.1	-0.471983	0.0149148	-0.547786	-0.20247	0.000682869	0.961741	0.0404219	0.682948	Pentatricopeptide repeat (PPR) superfamily protein	-	1	-	-	-	1
AT4G13070.1	-0.93362	-0.187026	-0.861977	-0.242284	0.000478499	0.655982	0.00568413	0.682855	RNA-binding CRS1 / YhbY (CRM) domain protein	-	-	-	-	1	1
AT4G23800.1	-0.800593	-0.0163571	-0.327532	-0.281824	2.35657e-05	0.971459	0.516582	0.681647	HMG (high mobility group) box protein	-	-	-	1	-	1
AT4G21980.2	1.09416	0.269498	0.982756	0.370367	7.81821e-09	0.313868	0.0458448	0.681176	Ubiquitin-like superfamily protein	-	-	1	-	-	1
AT2G01520.1	-1.13757	0.241712	-1.28671	-0.613511	0.0026131	0.704814	0.146078	0.68107	MLP-like protein 328	-	-	1	-	-	1
AT4G27720.1	-0.603994	-0.153057	-0.0789907	-0.270521	0.00195712	0.618624	0.911468	0.680793	Major facilitator superfamily protein	-	1	-	-	-	1
AT4G15850.1	-0.919234	-0.0976417	-0.992334	-0.351903	1.53397e-07	0.739507	0.034179	0.680595	RNA helicase 1	-	-	1	-	-	1
AT1G76220.1	0.973745	0.492671	0.322799	-1.03752	0.0488158	0.421063	0.899817	0.680105	Arabidopsis protein of unknown function (DUF241)	-	-	-	-	1	1
AT3G50400.1	4.45099	0.865628	7.10498	1.67576	3.13745e-28	0.0972424	0.000252222	0.680105	GDSL-like Lipase/Acylhydrolase superfamily protein	-	1	-	-	-	1
AT5G26660.1	-1.37177	-1.87191	-0.811788	-0.903594	2.65997e-11	5.76875e-19	0.649562	0.679792	myb domain protein 86	-	-	1	-	-	1
AT1G15380.1	-1.70305	-1.45005	-0.491012	-0.575892	0.00198052	0.0164474	0.671812	0.679494	Lactoylglutathione lyase / glyoxalase I family protein	-	1	-	-	-	1
AT5G21160.3	-0.29953	-0.183769	-0.669543	-0.238814	0.100748	0.456626	0.0297669	0.679057	LA RNA-binding protein	-	-	-	-	1	1
AT1G28400.1	-0.72779	-1.72173	-0.777148	-0.265453	0.00880306	5.99942e-11	0.0215557	0.678271		-	-	-	-	1	1
AT3G58940.1	-1.31904	-0.273519	-0.665393	-0.269031	4.33813e-06	0.505834	0.0703776	0.678118	F-box/RNI-like superfamily protein	1	-	-	-	-	1
AT4G01290.1	0.343986	0.115188	0.0552712	0.147181	0.000419848	0.409041	0.87971	0.678061		-	-	-	1	-	1
AT5G37310.1	-0.277161	0.130717	-0.153674	0.143244	0.0146841	0.385969	0.559114	0.677491	Endomembrane protein 70 protein family	-	-	-	-	1	1
AT3G55730.1	0.593864	0.0323989	-0.336723	-0.26857	0.00601039	0.948006	0.472032	0.67691	myb domain protein 109	-	-	-	-	1	1
AT5G01270.2	0.77398	0.244326	-0.0121519	0.183931	8.36209e-13	0.0674414	0.98132	0.67688	carboxyl-terminal domain (ctd) phosphatase-like 2	-	1	-	-	-	1
AT2G32930.2	1.08588	0.997129	0.804717	0.254779	2.92471e-08	5.20958e-07	0.0098919	0.67688	zinc finger nuclease 2	-	-	-	1	-	1
AT2G44280.1	2.16969	1.082	0.648458	0.317452	1.41103e-23	1.18356e-06	0.135385	0.675704	Major facilitator superfamily protein	-	-	1	-	-	1
AT5G28919.1	-0.499786	-0.430481	-0.325211	-0.143553	0.000318625	0.00297612	0.0971121	0.674343		-	-	-	-	1	1
AT4G23030.1	-4.41866	-5.02937	-0.52111	-1.09534	0.0241828	0.00850376	0.838223	0.6742	MATE efflux family protein	-	-	1	-	-	1
AT1G70170.1	1.96914	-1.10531	2.21698	-0.999945	1.8122e-06	0.0204575	0.0983207	0.673621	matrix metalloproteinase	-	-	1	-	-	1
AT5G66520.1	-1.41872	0.710286	-0.150909	-0.297041	0.0224771	0.297388	0.825275	0.673304	Tetratricopeptide repeat (TPR)-like superfamily protein	-	1	-	-	-	1
AT4G26850.1	1.32478	0.886959	-0.280378	0.24666	8.79823e-09	0.000329549	0.520334	0.673304	mannose-1-phosphate guanylyltransferase (GDP)s;GDP-galactose:mannose-1-phosphate guanylyltransferases;GDP-galactose:glucose-1-phosphate guanylyltransferases;GDP-galactose:myoinositol-1-phosphate guanylyltransferases;glucose-1-phosphate guanylyltransferase	1	-	-	-	-	1
AT1G72450.1	-1.89187	-2.00627	0.81048	0.526229	0.000212766	0.000142355	0.324965	0.672769	jasmonate-zim-domain protein 6	-	1	-	-	-	1
AT4G25320.1	0.00757616	-0.00479635	-0.481693	0.169808	0.971945	0.983565	0.0268032	0.672769	AT hook motif DNA-binding family protein	-	-	1	-	-	1
AT5G07040.1	-0.0931606	-0.910433	0.857205	-1.54069	0.862022	0.0223703	0.801461	0.67244	RING/U-box superfamily protein	-	-	1	-	-	1
AT5G46370.1	2.41585	2.78219	1.49375	-2.18221	0.000277103	5.42721e-06	0.707827	0.671368	Ca2+ activated outward rectifying K+ channel 2	1	-	-	-	-	1
AT3G12510.1	2.93808	1.78351	1.57396	0.400871	1.61716e-22	2.29616e-08	0.000529114	0.671368	MADS-box family protein	-	1	-	-	-	1
AT2G37690.1	-0.660307	-0.246411	-1.17877	-0.338027	7.21426e-05	0.262964	0.00331769	0.670166	phosphoribosylaminoimidazole carboxylase, putative / AIR carboxylase, putative	-	-	1	-	-	1
AT2G26140.1	0.261823	0.16139	0.156698	0.110283	0.00177967	0.106589	0.372228	0.668766	FTSH protease 4	-	1	-	-	-	1
AT2G05760.1	-0.863229	-0.0134868	-0.0672194	-0.259589	0.000256069	0.98119	0.92033	0.66869	Xanthine/uracil permease family protein	-	-	-	-	1	1
AT3G61490.4	0.818563	0.840454	0.682098	0.240222	0.033086	0.0471494	0.0224363	0.66869		-	-	1	-	-	1
AT4G03340.1	0.0692819	-0.571293	0.847005	-0.525671	0.827126	0.0179419	0.273666	0.667041	Core-2/I-branching beta-1,6-N-acetylglucosaminyltransferase family protein	1	-	-	-	-	1
AT1G14240.1	0.89024	1.33656	1.13424	0.975156	0.00216648	2.69983e-06	0.511732	0.666953	GDA1/CD39 nucleoside phosphatase family protein	-	1	-	-	-	1
AT1G20110.1	0.61342	0.24678	0.343592	0.217752	2.98129e-06	0.137359	0.299346	0.666953	RING/FYVE/PHD zinc finger superfamily protein	-	1	-	-	-	1
AT5G59550.2	0.976599	-0.0420859	0.401897	0.317189	0.000106595	0.942748	0.445323	0.665774		-	-	1	-	-	1
AT1G15000.1	-0.826986	0.380444	-0.71155	0.273191	1.12142e-07	0.0254131	0.0420036	0.665774	serine carboxypeptidase-like 50	-	-	1	-	-	1
AT1G07795.1	1.02017	-0.587469	0.916972	-2.69312	0.0250947	0.368851	0.87525	0.66513		-	-	1	-	-	1
AT3G61860.1	-0.198829	-0.047982	-0.179004	-0.13095	0.0458023	0.769642	0.396047	0.665003	RNA-binding (RRM/RBD/RNP motifs) family protein	-	1	-	-	-	1
AT3G29360.1	0.707172	0.546804	0.279879	0.13002	4.26943e-23	7.10697e-14	0.11087	0.665003	UDP-glucose 6-dehydrogenase family protein	-	-	1	-	-	1
AT5G52530.1	0.270338	0.0857547	-0.0393778	0.112844	0.00716871	0.576415	0.887704	0.664382	dentin sialophosphoprotein-related	-	-	1	-	-	1
AT1G78530.1	1.69197	-0.976808	-0.16888	-0.437671	0.00121882	0.134374	0.874508	0.664382	Protein kinase superfamily protein	-	-	-	-	1	1
AT3G50030.1	1.15309	1.65574	4.52279	3.29079	0.013909	0.00033009	0.379114	0.664382	ARM-repeat/Tetratricopeptide repeat (TPR)-like protein	-	-	1	-	-	1
AT4G17100.1	-0.344339	-0.246073	-0.108987	-0.237575	0.00164669	0.04697	0.841998	0.664375	na	-	-	1	-	-	1
AT2G30700.1	0.0901739	0.567824	-0.1719	0.142096	0.586606	5.41226e-06	0.474287	0.664098		1	-	-	-	-	1
AT5G55140.1	-0.480834	-0.0878878	-0.410124	-0.182993	0.0066775	0.770471	0.099672	0.663835	ribosomal protein L30 family protein	1	-	-	-	-	1
AT3G20360.1	-2.57818	-6.5544	-2.01446	-2.99574	0.0881914	0.00074871	0.724273	0.663601	TRAF-like family protein	-	-	1	-	-	1
AT4G35680.1	3.96125	2.34208	3.10554	2.15771	7.32169e-07	0.00439683	NA	0.663539	Arabidopsis protein of unknown function (DUF241)	-	-	-	-	1	1
AT5G14940.1	1.74197	0.609185	0.544017	0.362503	1.17322e-12	0.0323859	0.340855	0.663539	Major facilitator superfamily protein	-	-	1	-	-	1
AT5G63930.1	0.400905	0.100653	0.196378	0.191201	0.00253115	0.635154	0.563098	0.663075	Leucine-rich repeat protein kinase family protein	1	-	-	-	-	1
AT1G71030.1	-0.276884	-1.96775	-0.172756	-0.164011	0.787397	0.0167119	0.548817	0.662979	MYB-like 2	1	-	-	-	-	1
AT3G56730.2	2.26254	-0.565681	1.39481	0.857456	1.35311e-08	0.335559	0.234329	0.662902	Putative endonuclease or glycosyl hydrolase	-	-	1	-	-	1
AT4G24740.1	0.628382	0.299861	0.0451612	0.148095	4.09478e-09	0.0132643	0.902659	0.662419	FUS3-complementing gene 2	-	1	-	-	-	1
AT2G46450.1	-1.23645	-0.573332	-0.742301	-0.272543	0.000122444	0.152769	0.0298001	0.662315	cyclic nucleotide-gated channel 12	-	-	1	-	-	1
AT1G20950.1	-0.645707	-0.172981	-0.425913	-0.207576	0.00260099	0.609517	0.131518	0.661807	Phosphofructokinase family protein	-	-	-	1	-	1
AT1G79630.1	-0.402524	0.049435	0.177129	0.184067	0.00539137	0.855603	0.59268	0.661563	Protein phosphatase 2C family protein	-	1	-	-	-	1
AT3G47110.1	-0.227726	-1.78394	0.10412	-0.645373	0.732692	0.000344867	0.953934	0.660581	Leucine-rich repeat protein kinase family protein	-	-	1	-	-	1
AT3G05630.1	4.72315	1.98951	1.88966	-0.420273	1.67873e-55	2.53153e-10	3.54539e-05	0.660581	phospholipase D P2	-	1	-	-	-	1
AT1G22850.1	0.409809	0.182362	0.423083	0.225558	0.00923714	0.394068	0.180208	0.660468	SNARE associated Golgi protein family	-	1	-	-	-	1
AT2G36460.1	-0.424854	-0.0058875	0.00218745	0.179867	0.0126636	0.988645	0.997221	0.659699	Aldolase superfamily protein	1	-	-	-	-	1
AT2G30070.1	1.25202	0.521073	-0.204371	0.154939	6.3413e-16	0.00179952	0.406538	0.6593	potassium transporter 1	-	-	1	-	-	1
AT5G47200.1	1.16153	0.19852	0.714557	-0.210124	5.79209e-43	0.0642533	0.00318982	0.658391	RAB GTPase homolog 1A	-	1	-	-	-	1
AT5G60640.1	-0.355745	-0.0580473	-0.113618	0.141391	0.000286309	0.736107	0.673938	0.658004	PDI-like 1-4	-	-	-	1	-	1
AT1G10380.1	0.156036	-0.13078	0.623571	0.243897	0.572143	0.728229	0.033259	0.657051	Putative membrane lipoprotein	-	-	1	-	-	1
AT3G46530.1	-1.40233	-1.24515	-0.619003	-0.131457	0.00639451	0.0276789	1.57126e-05	0.657051	NB-ARC domain-containing disease resistance protein	-	-	-	-	1	1
AT3G03280.1	1.72428	1.44604	1.35314	1.44934	1.04817e-06	9.85184e-05	0.537859	0.656375		-	-	1	-	-	1
AT5G67170.1	0.581889	-0.217644	-0.180672	-0.372282	0.00549088	0.459092	0.830339	0.656162	SEC-C motif-containing protein / OTU-like cysteine protease family protein	-	1	-	-	-	1
AT3G06670.2	0.415862	0.0546361	0.0760505	0.112683	4.45109e-07	0.705342	0.737422	0.656162	binding	-	1	-	-	-	1
AT3G12010.1	0.462351	0.170598	0.232067	0.133944	9.43193e-08	0.111454	0.2233	0.656162		1	-	-	-	-	1
AT4G28100.1	-0.421291	0.108921	-0.458607	-0.168006	0.0204355	0.712807	0.0264995	0.656162		-	-	1	-	-	1
AT1G06780.2	1.23133	0.379181	0.623544	0.204054	2.24611e-26	0.0047172	0.00884313	0.655918	galacturonosyltransferase 6	-	1	-	-	-	1
AT3G46720.1	-1.09022	-1.41422	-1.46139	-0.940678	7.87342e-05	4.08373e-07	0.283059	0.655301	UDP-Glycosyltransferase superfamily protein	-	1	-	-	-	1
AT5G09978.1	-0.203754	-1.15116	2.35043	-4.58195	0.716722	0.0104926	0.820443	0.654948	elicitor peptide 7 precursor	-	-	-	-	1	1
AT1G04300.3	0.394044	-0.00576309	-0.0744057	0.136733	0.00354711	0.986197	0.801702	0.654498	TRAF-like superfamily protein	-	-	1	-	-	1
AT1G67090.1	-2.4211	1.16658	-0.0188178	-0.249756	0.045621	0.498715	0.977945	0.654463	ribulose bisphosphate carboxylase small chain 1A	-	1	-	-	-	1
AT5G20050.1	-0.704511	-1.02769	-0.570762	-0.568435	0.000211962	4.84636e-08	0.566375	0.654326	Protein kinase superfamily protein	-	1	-	-	-	1
AT5G47630.1	-0.632899	-0.094339	-0.382127	-0.318362	0.00311035	0.791781	0.46628	0.654326	mitochondrial acyl carrier protein 3	-	-	-	1	-	1
AT2G24300.3	-0.0732665	-0.35566	-0.521402	-0.502497	0.721989	0.0394731	0.541802	0.653124		-	-	1	-	-	1
AT5G52020.1	-1.12693	-1.07548	-0.0999643	-1.29479	1.58711e-05	0.000150385	0.975361	0.651422	Integrase-type DNA-binding superfamily protein	-	-	1	-	-	1
AT5G14000.3	0.200367	0.34753	-0.328281	-0.46671	0.163016	0.011853	0.710512	0.650832		-	-	-	1	-	1
AT3G13600.1	0.822201	0.503071	1.35712	0.57183	0.037135	0.327719	0.0529314	0.650716	calmodulin-binding family protein	1	-	-	-	-	1
AT1G12805.1	2.1124	2.99569	0.676265	1.98876	0.0265297	0.000783919	0.905799	0.650675	nucleotide binding	1	-	-	-	-	1
AT2G37980.1	0.829318	-0.101295	0.286531	-1.15766	2.01393e-06	0.749654	0.92033	0.649903	O-fucosyltransferase family protein	1	-	-	-	-	1
AT3G53230.1	0.954986	0.677708	1.31722	0.509961	0.000203093	0.019792	0.0347943	0.649903	ATPase, AAA-type, CDC48 protein	-	-	-	-	1	1
AT1G10760.1	0.83808	0.776022	0.756387	0.508239	0.000510346	0.00249068	0.316569	0.649815	Pyruvate phosphate dikinase, PEP/pyruvate binding domain	-	1	-	-	-	1
AT1G74000.1	2.57426	2.84836	0.731383	0.711908	4.41335e-14	5.44698e-22	0.552712	0.649647	strictosidine synthase 3	-	-	1	-	-	1
AT5G53290.1	-0.550072	0.424902	-0.385991	0.390911	0.00159682	0.0228978	0.573359	0.64917	cytokinin response factor 3	-	1	-	-	-	1
AT4G35510.1	1.19576	0.448369	0.509331	-0.217735	3.71413e-10	0.054208	0.0581891	0.649035		-	-	-	1	-	1
AT5G48920.1	-0.269051	0.665402	0.436279	0.669962	0.434824	0.0322847	0.752008	0.64824	tracheary element differentiation-related 7	-	-	1	-	-	1
AT5G15460.1	0.487711	0.134196	0.231204	-0.219613	0.00181353	0.570203	0.53118	0.648013	membrane-anchored ubiquitin-fold protein 2	-	-	-	1	-	1
AT2G24260.1	1.72194	1.05775	0.609729	0.429437	6.71483e-27	2.22775e-10	0.340638	0.648013	LJRHL1-like 1	-	-	1	-	-	1
AT3G25940.1	-0.595315	-0.191685	-0.925291	-0.42943	0.00946557	0.564343	0.0993132	0.648013	TFIIB zinc-binding protein	-	-	-	1	-	1
AT3G61540.1	-0.717075	-0.180902	0.140298	0.215698	5.71556e-06	0.407935	0.746482	0.647958	alpha/beta-Hydrolases superfamily protein	-	-	-	-	1	1
AT1G71790.1	0.191174	-0.556759	-0.173468	-0.265725	0.37626	0.00379232	0.744639	0.647958	Subunits of heterodimeric actin filament capping protein Capz superfamily	-	-	1	-	-	1
AT1G14300.2	-0.36179	0.0366087	-0.774427	-0.245425	0.0388402	0.916897	0.00659054	0.647756	ARM repeat superfamily protein	-	-	-	1	-	1
AT1G78420.1	0.81544	0.0641974	0.147429	0.191742	6.97264e-10	0.803647	0.681869	0.647594	RING/U-box superfamily protein	-	-	1	-	-	1
AT3G59000.1	-0.499389	-0.317075	-0.121878	0.279261	0.0239253	0.2239	0.851916	0.646901	F-box/RNI-like superfamily protein	-	-	1	-	-	1
AT4G00525.1	-1.61655	-0.035687	0.331015	-0.884162	0.0204074	0.982053	0.867211	0.646849		-	-	-	-	1	1
AT4G39700.1	1.144	1.40132	1.02721	2.15669	0.00132668	3.8934e-05	0.839152	0.646849	Heavy metal transport/detoxification superfamily protein	-	1	-	-	-	1
AT1G23050.1	1.16074	0.783477	0.475852	0.464625	0.00358189	0.0913438	0.547758	0.646849	hydroxyproline-rich glycoprotein family protein	-	-	1	-	-	1
AT4G22214.1	-1.53062	-0.0293647	-0.230503	3.05342	0.000777218	0.978869	0.977312	0.644603	Defensin-like (DEFL) family protein	-	-	-	-	1	1
AT2G32830.1	4.29573	2.47117	0.838216	1.20257	0.0120324	0.0424455	0.749186	0.644269	phosphate transporter 1;5	-	-	1	-	-	1
AT2G44730.1	0.845284	0.123845	-0.0737211	0.223309	5.11701e-06	0.70162	0.888512	0.644176	Alcohol dehydrogenase transcription factor Myb/SANT-like family protein	-	1	-	-	-	1
AT5G17210.1	0.825986	0.267066	0.257858	0.336671	4.49375e-05	0.344037	0.677651	0.643807	Protein of unknown function (DUF1218)	-	-	-	-	1	1
AT2G28990.1	-0.145344	-2.49473	-1.33164	-3.86942	0.793326	2.46254e-10	0.880023	0.643747	Leucine-rich repeat protein kinase family protein	-	1	-	-	-	1
AT4G33460.1	0.54171	0.352538	0.551832	0.311744	0.00956011	0.133209	0.192488	0.643376	ABC transporter family protein	-	-	1	-	-	1
AT3G04650.1	-0.827209	-0.0282573	-0.668467	-0.355088	0.0014297	0.958864	0.157212	0.643211	FAD/NAD(P)-binding oxidoreductase family protein	-	-	1	-	-	1
AT3G05700.1	0.557504	-0.0710965	0.292735	-0.224622	0.005231	0.851287	0.392567	0.642423	Drought-responsive family protein	-	1	-	-	-	1
AT1G49960.1	1.8571	0.403595	2.76102	1.48331	1.90363e-05	0.557943	0.13465	0.641372	Xanthine/uracil permease family protein	-	-	1	-	-	1
AT5G64860.1	-0.694316	0.180577	0.139705	0.373929	2.46915e-06	0.338805	0.868514	0.641278	disproportionating enzyme	-	-	1	-	-	1
AT5G65860.1	-0.517877	-0.097119	-1.14419	-0.314318	0.00122801	0.716439	0.0010529	0.641199	ankyrin repeat family protein	-	-	-	-	1	1
AT3G61670.1	-0.335707	-0.0195788	-0.39396	-0.160005	0.0253404	0.950995	0.0434716	0.640583	Protein of unknown function (DUF3133)	-	1	-	-	-	1
AT5G50820.1	-0.521961	-1.52947	-0.362214	-1.02364	0.0338686	5.07418e-10	0.876396	0.640382	NAC domain containing protein 97	-	1	-	-	-	1
AT1G75140.1	-0.898235	-0.459673	-0.150844	0.230675	1.90763e-08	0.0091471	0.736607	0.639895		1	-	-	-	-	1
AT2G26510.1	-0.291634	-0.253342	-0.153064	0.197073	0.0190736	0.0696149	0.671812	0.639895	Xanthine/uracil permease family protein	-	-	-	1	-	1
AT1G15200.3	-0.0410417	-0.0853413	-0.560886	-0.176562	0.835062	0.716277	0.00448831	0.638456	protein-protein interaction regulator family protein	-	-	-	1	-	1
AT5G07000.1	1.97678	1.58193	-0.173183	-0.357378	3.45107e-16	6.41816e-11	0.820667	0.63811	sulfotransferase 2B	-	-	-	-	1	1
AT1G34630.1	1.50723	0.641299	0.653245	-0.236645	1.05871e-32	2.10176e-06	0.0155662	0.637075		-	1	-	-	-	1
AT5G40340.1	0.650513	0.430483	0.291982	0.235894	0.00028184	0.0353463	0.418359	0.636208	Tudor/PWWP/MBT superfamily protein	-	1	-	-	-	1
AT1G26340.1	-0.35015	0.0579818	-0.665963	-0.25182	0.0730202	0.873221	0.024747	0.636208	cytochrome B5 isoform A	-	-	-	-	1	1
AT4G10040.1	1.32841	0.379172	0.498444	-0.355076	2.38096e-08	0.24461	0.333523	0.636027	cytochrome c-2	-	1	-	-	-	1
AT3G43220.1	1.2542	0.498742	0.419132	0.168413	3.22221e-15	0.00584766	0.0366003	0.635872	Phosphoinositide phosphatase family protein	-	-	-	1	-	1
AT4G05190.1	-1.08422	-0.117245	-0.335559	-0.268366	8.80875e-06	0.797407	0.408075	0.634581	kinesin 5	1	-	-	-	-	1
AT1G13710.1	-7.31795	-2.55486	-0.302602	-0.245684	5.61798e-06	0.0380485	0.419799	0.634261	cytochrome P450, family 78, subfamily A, polypeptide 5	-	-	1	-	-	1
AT3G28430.1	1.53686	0.487055	0.378598	0.163146	2.38253e-14	0.0480907	0.0524243	0.634261		-	1	-	-	-	1
AT2G25530.1	0.912779	-0.370923	1.14842	0.226224	0.00705884	0.445509	2.00324e-07	0.633553	AFG1-like ATPase family protein	-	-	1	-	-	1
AT3G46900.1	-0.785058	-3.24981	0.136629	0.813636	0.14855	5.66274e-11	0.948003	0.632857	copper transporter 2	-	-	1	-	-	1
AT3G53850.1	-0.790589	-0.439295	-0.460031	-0.281275	0.0105096	0.23474	0.234916	0.632806	Uncharacterised protein family (UPF0497)	-	1	-	-	-	1
AT1G54490.1	0.443265	0.295675	0.232062	0.0973926	2.35675e-06	0.00413346	0.0442366	0.632519	exoribonuclease 4	-	-	-	-	1	1
AT3G61810.1	-2.92133	1.28214	2.64641	0.989634	0.0100118	0.38334	0.0266905	0.632358	Glycosyl hydrolase family 17 protein	-	-	-	-	1	1
AT5G55360.1	1.2759	0.452148	1.6815	2.25487	0.0219279	0.552843	NA	0.632288	MBOAT (membrane bound O-acyl transferase) family protein	-	1	-	-	-	1
AT1G61850.2	0.380169	0.167092	0.206282	0.14134	0.000191344	0.201941	0.3025	0.631327	phospholipases;galactolipases	-	-	1	-	-	1
AT1G80790.1	-0.553544	0.0385359	-0.174585	0.15872	6.10689e-05	0.892457	0.487818	0.63056	XH/XS domain-containing protein	-	-	-	1	-	1
AT3G05580.1	0.906765	-0.162059	1.03956	0.308838	3.20651e-08	0.540679	0.00190174	0.629515	Calcineurin-like metallo-phosphoesterase superfamily protein	-	1	-	-	-	1
AT5G43860.1	-5.68314	0.333056	1.08224	0.562835	0.00373905	0.914512	0.133753	0.629208	chlorophyllase 2	1	-	-	-	-	1
AT5G38350.1	-3.04987	-2.17724	-5.53021	-1.6606	5.26867e-18	6.3073e-16	0.0124381	0.628602	Disease resistance protein (NBS-LRR class) family	-	-	1	-	-	1
AT2G40370.1	4.06382	0.107745	4.99569	0.588805	2.25918e-23	0.907561	5.12647e-21	0.628602	laccase 5	-	-	1	-	-	1
AT4G19880.2	-1.5468	-0.499319	-0.697808	-0.527028	3.64415e-14	0.042778	0.366513	0.62829	Glutathione S-transferase family protein	1	-	-	-	-	1
AT1G63295.2	0.32807	1.29418	0.488164	1.17547	0.336348	5.03261e-07	0.854719	0.628025		-	-	-	1	-	1
AT1G28540.1	0.657659	0.104638	0.162907	-0.253508	0.00144307	0.770697	0.740427	0.627807		-	1	-	-	-	1
AT4G31300.2	0.302591	0.13767	0.078576	-0.133479	0.0351167	0.505088	0.762994	0.626484	N-terminal nucleophile aminohydrolases (Ntn hydrolases) superfamily protein	-	-	-	1	-	1
AT3G19450.1	-0.549788	-0.857575	-0.375675	-0.437071	3.84244e-05	7.94229e-11	0.616512	0.62629	GroES-like zinc-binding alcohol dehydrogenase family protein	1	-	-	-	-	1
AT4G15330.1	-1.03517	-0.360944	-2.21775	-1.36968	0.00350575	0.485018	0.224296	0.62629	cytochrome P450, family 705, subfamily A, polypeptide 1	-	-	1	-	-	1
AT1G02380.1	1.33184	0.0825708	0.336089	0.471066	0.0139534	0.944251	0.688874	0.625907		-	-	-	-	1	1
AT4G05020.2	1.89076	0.99176	1.35571	0.837718	7.64094e-12	0.00118704	0.228783	0.625865	NAD(P)H dehydrogenase B2	-	1	-	-	-	1
AT3G63120.1	1.10621	0.252199	0.526725	0.237769	5.91336e-10	0.324515	0.0646329	0.625865	cyclin p1;1	-	1	-	-	-	1
AT5G53710.2	5.91675	1.46579	6.34452	3.85694	0.000641279	0.430567	0.210389	0.62554		-	1	-	-	-	1
AT4G20010.1	-0.630554	0.0172579	-0.155075	-0.268179	0.00295515	0.970738	0.769078	0.625437	plastid transcriptionally active 9	1	-	-	-	-	1
AT2G29440.1	0.836942	0.82415	1.07161	-0.471163	0.00406776	0.00810623	0.0467683	0.625437	glutathione S-transferase tau 6	-	-	-	-	1	1
AT1G04620.1	0.0647349	0.919017	0.239922	0.440778	0.905895	0.010505	0.786829	0.625234	coenzyme F420 hydrogenase family / dehydrogenase, beta subunit family	-	-	1	-	-	1
AT3G21620.1	1.80331	1.84063	4.18826	3.65281	1.17241e-06	1.72531e-07	0.450112	0.62464	ERD (early-responsive to dehydration stress) family protein	-	1	-	-	-	1
AT5G64900.1	0.689538	2.35555	-0.456141	-0.526783	0.141812	2.41465e-09	0.632413	0.624378	precursor of peptide 1	-	1	-	-	-	1
AT5G63670.1	-0.444822	-0.304698	-0.0462504	-0.251537	0.00335087	0.0536242	0.941143	0.622374	SPT4 homolog 2	-	-	-	1	-	1
AT3G50470.1	-3.46114	-7.67308	-1.56224	-2.14423	3.75086e-06	2.56488e-08	0.685949	0.62199	homolog of RPW8 3	1	-	-	-	-	1
AT2G38670.1	0.495326	0.570497	0.215062	0.191803	4.40943e-08	1.93938e-10	0.46628	0.621984	phosphorylethanolamine cytidylyltransferase 1	-	1	-	-	-	1
AT4G32440.2	0.610244	0.205806	0.23894	0.245139	2.20106e-05	0.287242	0.54532	0.621511	Plant Tudor-like RNA-binding protein	-	1	-	-	-	1
AT4G04830.1	-1.92255	-0.350512	0.154182	0.377753	9.70666e-16	0.303559	0.84946	0.621267	methionine sulfoxide reductase B5	-	-	1	-	-	1
AT4G24750.1	-0.845898	-0.241899	-0.147032	-0.234675	0.000346259	0.468491	0.741428	0.621146	Rhodanese/Cell cycle control phosphatase superfamily protein	-	-	-	1	-	1
AT1G77220.1	0.82514	0.210559	0.334648	0.204411	1.93798e-09	0.269732	0.213588	0.62052	Protein of unknown function (DUF300)	-	1	-	-	-	1
AT3G05020.1	0.502679	0.00740576	0.0625809	-0.177345	0.000852395	0.984594	0.869266	0.620228	acyl carrier protein 1	-	1	-	-	-	1
AT2G28550.3	-0.0405513	-0.446929	-0.186114	0.241342	0.851029	0.00454149	0.661999	0.620228	related to AP2.7	-	-	1	-	-	1
AT2G35605.1	-0.511533	0.0223005	-0.536667	-0.301396	0.0362961	0.967026	0.163737	0.620228	SWIB/MDM2 domain superfamily protein	-	-	1	-	-	1
AT2G35690.1	1.24529	0.157624	0.66182	0.206383	1.09469e-16	0.516057	0.00259043	0.620127	acyl-CoA oxidase 5	-	-	-	-	1	1
AT2G22610.3	-0.624036	-0.0123702	-0.01999	-0.295866	0.0106518	0.983043	0.978308	0.619685		-	-	-	-	1	1
AT5G03630.1	-1.05071	-0.801798	-0.351007	-0.404039	1.99946e-13	7.14728e-08	0.604558	0.619685	Pyridine nucleotide-disulphide oxidoreductase family protein	-	-	-	1	-	1
AT1G53980.1	-1.86951	-2.01819	-3.3643	-3.27378	0.00734936	0.00661788	0.523647	0.619685	Ubiquitin-like superfamily protein	-	-	-	1	-	1
AT1G06900.1	-0.154823	-0.0795189	-0.487513	-0.168174	0.12701	0.580547	0.00845482	0.619685	Insulinase (Peptidase family M16) family protein	1	-	-	-	-	1
AT2G29540.3	-0.884878	0.0368733	-1.15383	-0.521021	0.00335825	0.953958	0.0635058	0.619585	RNApolymerase 14 kDa subunit	-	1	-	-	-	1
AT2G36895.3	1.98091	0.739556	1.04253	0.336671	1.55369e-28	0.000168846	0.00397085	0.619571		-	1	-	-	-	1
AT4G20690.1	-0.921866	-0.782723	-1.24009	-0.505724	0.604161	0.749632	0.0209032	0.619412		-	1	-	-	-	1
AT1G60270.1	0.161667	-0.458683	0.849805	0.36774	0.730622	0.322214	0.0467457	0.619311	beta glucosidase 6	-	-	-	1	-	1
AT5G56890.1	-0.605767	-0.283294	-0.212252	0.138779	5.05844e-09	0.0167831	0.254909	0.618974	Protein kinase superfamily protein	-	-	1	-	-	1
AT5G46640.1	0.499422	0.0202079	-0.298933	0.407949	0.00202994	0.954554	0.677446	0.618825	AT hook motif DNA-binding family protein	-	-	-	1	-	1
AT3G22120.2	-2.18067	1.0011	-0.459003	-0.318239	0.00229672	0.289901	0.294919	0.618688		-	1	-	-	-	1
AT1G64910.1	-3.11629	-3.51431	-1.4476	-3.0598	3.4426e-14	3.93078e-13	NA	0.617861	UDP-Glycosyltransferase superfamily protein	-	-	-	-	1	1
AT3G56950.2	0.234412	-0.0822833	0.198177	0.225272	0.0234706	0.595244	0.598239	0.616559	small and basic intrinsic protein 2;1	-	-	-	-	1	1
AT4G28070.2	-0.683798	-0.346428	0.181074	0.289625	0.0398501	0.437733	0.743302	0.615736	AFG1-like ATPase family protein	-	-	1	-	-	1
AT1G28530.1	-0.757601	-0.0367229	-0.442285	-0.377085	0.00207864	0.94246	0.424636	0.613772		-	1	-	-	-	1
AT5G64380.1	-1.34184	-0.980313	-0.0871657	-0.241895	0.0071957	0.0545272	0.865247	0.613637	Inositol monophosphatase family protein	-	-	-	1	-	1
AT3G14415.2	-3.4727	-2.91762	-0.177159	-0.230524	5.35311e-12	1.54353e-08	0.655818	0.613588	Aldolase-type TIM barrel family protein	-	-	1	-	-	1
AT5G19730.1	1.39236	0.654702	0.268748	-0.226464	1.95327e-05	0.101662	0.414142	0.613588	Pectin lyase-like superfamily protein	-	-	1	-	-	1
AT1G07980.1	0.482785	0.429142	0.249914	0.203605	0.0283669	0.083116	0.39688	0.613588	nuclear factor Y, subunit C10	-	1	-	-	-	1
AT2G44510.1	-1.22362	0.00891686	-1.39239	-0.442962	0.00181541	0.992471	0.00453757	0.612907	CDK inhibitor P21 binding protein	1	-	-	-	-	1
AT1G55820.1	-0.152405	0.0592375	-0.739143	-0.217419	0.385723	0.833084	0.000812855	0.612907	Kinase-related protein of unknown function (DUF1296)	-	1	-	-	-	1
AT4G14550.2	-0.666405	-0.764248	1.07596	0.413412	0.00050081	4.96484e-05	0.019425	0.612469		-	1	-	-	-	1
AT3G49940.1	-1.3436	-1.36324	-0.857479	-0.459276	1.79359e-10	1.87514e-10	0.129534	0.612439	LOB domain-containing protein 38	-	-	-	-	1	1
AT5G47430.6	0.424883	0.17909	0.128832	0.165471	1.80879e-05	0.152564	0.648619	0.612229		-	-	1	-	-	1
AT2G46660.1	-1.71447	-1.70344	-1.02705	-0.542235	2.36209e-06	2.51505e-06	0.130118	0.61201	cytochrome P450, family 78, subfamily A, polypeptide 6	-	1	-	-	-	1
AT4G16110.1	1.0556	0.328132	0.625632	0.323614	4.04373e-10	0.130253	0.11087	0.61201	response regulator 2	1	-	-	-	-	1
AT5G45100.1	1.0858	0.312001	0.671899	0.25677	1.79983e-07	0.276141	0.01976	0.61201	SBP (S-ribonuclease binding protein) family protein	-	-	1	-	-	1
AT4G31160.1	-0.201596	0.201111	-0.452088	0.126503	0.0536755	0.079847	0.000483691	0.61201	DDB1-CUL4 associated factor 1	-	-	1	-	-	1
AT2G18220.1	-0.706001	-0.0730314	-1.4217	-0.304809	2.30264e-08	0.748649	1.86322e-06	0.61201	Noc2p family	-	1	-	-	-	1
AT2G20585.6	-0.691185	-0.124785	-0.461542	-0.311205	0.000241822	0.685894	0.264726	0.611276		1	-	-	-	-	1
AT3G14540.1	-0.922608	-0.196606	-0.0187129	-1.11161	0.00268539	0.697754	0.994401	0.610923	Terpenoid cyclases/Protein prenyltransferases superfamily protein	-	-	1	-	-	1
AT5G63650.1	-0.306409	-0.564983	0.210951	-0.614915	0.160551	0.00816876	0.871681	0.610923	SNF1-related protein kinase 2.5	-	-	1	-	-	1
AT4G39970.1	-2.59933	-2.2416	0.0269955	-0.280748	2.80426e-09	1.04547e-07	0.970011	0.610873	Haloacid dehalogenase-like hydrolase (HAD) superfamily protein	-	1	-	-	-	1
AT1G16870.1	-0.419665	0.0798575	-0.530773	-0.18425	0.000478067	0.68725	0.00745887	0.610873	mitochondrial 28S ribosomal protein S29-related	-	1	-	-	-	1
AT1G65450.1	6.40053	4.53701	-0.103974	0.460358	0.00169376	0.0633742	0.926025	0.610436	HXXXD-type acyl-transferase family protein	-	1	-	-	-	1
AT1G65320.1	0.280378	0.27075	0.336489	0.209788	0.0109919	0.0189474	0.219127	0.610238	Cystathionine beta-synthase (CBS) family protein	-	-	-	1	-	1
AT1G11790.1	1.42812	0.311125	0.550824	-0.238276	2.12898e-16	0.187898	0.0392804	0.610238	arogenate dehydratase 1	-	1	-	-	-	1
AT4G23980.1	-0.990458	-0.597524	-0.0274313	0.170975	6.10523e-11	0.000122418	0.947816	0.609735	auxin response factor 9	-	-	1	-	-	1
AT1G10200.1	-0.0984637	0.405751	0.136787	0.24697	0.465345	0.000254525	0.77222	0.60946	GATA type zinc finger transcription factor family protein	-	-	1	-	-	1
AT3G63540.1	-0.758379	-0.425191	-0.109309	-0.230085	0.0119619	0.266621	0.812179	0.609005	Mog1/PsbP/DUF1795-like photosystem II reaction center PsbP family protein	-	-	1	-	-	1
AT4G39080.1	0.308533	-0.0433173	0.178219	0.128884	0.00163158	0.813451	0.309848	0.608145	vacuolar proton ATPase A3	-	-	-	1	-	1
AT2G17050.2	-1.00279	-2.80264	-1.94502	-2.88413	0.213782	0.000209274	0.706195	0.607656		-	-	-	1	-	1
AT1G67900.1	1.54901	1.37225	0.636825	0.316024	5.85067e-19	1.44493e-15	0.089655	0.607124	Phototropic-responsive NPH3 family protein	-	-	-	1	-	1
AT4G27020.1	0.911504	0.453264	0.342602	0.241544	1.95705e-07	0.0254499	0.293727	0.60665		-	1	-	-	-	1
AT1G32740.1	0.429289	1.38526	0.633376	0.352579	0.18579	4.69283e-07	0.147953	0.606562	SBP (S-ribonuclease binding protein) family protein	-	-	-	1	-	1
AT3G01690.1	-1.97565	-1.67781	-0.173776	-0.222798	3.86824e-15	6.23928e-11	0.643117	0.6064	alpha/beta-Hydrolases superfamily protein	-	-	1	-	-	1
AT1G30810.1	0.971428	0.0883867	0.0485675	0.148731	2.21531e-09	0.769911	0.879635	0.606212	Transcription factor jumonji (jmj) family protein / zinc finger (C5HC2 type) family protein	-	-	1	-	-	1
AT2G37460.1	-1.53947	-1.55774	-1.10665	-0.460276	7.71187e-16	7.11978e-16	0.0332619	0.605013	nodulin MtN21 /EamA-like transporter family protein	-	-	-	1	-	1
AT5G20890.1	-0.371599	-0.0595599	-0.484764	-0.166593	0.00108421	0.769631	0.00591945	0.604764	TCP-1/cpn60 chaperonin family protein	-	1	-	-	-	1
AT5G42510.1	3.25665	1.67782	3.33562	0.875837	2.05404e-63	2.87051e-17	1.72894e-05	0.604764	Disease resistance-responsive (dirigent-like protein) family protein	-	1	-	-	-	1
AT1G75460.1	2.9306	4.28285	0.294314	0.250033	0.000210903	8.20663e-07	0.410565	0.604407	ATP-dependent protease La (LON) domain protein	-	1	-	-	-	1
AT3G08630.1	1.48168	0.687982	1.36488	0.257858	3.51556e-34	1.1296e-07	9.1448e-09	0.604407	Protein of unknown function (DUF3411)	-	1	-	-	-	1
AT5G54870.1	1.12882	0.603112	0.486018	0.231419	3.37879e-21	1.76017e-06	0.0702896	0.6043		-	1	-	-	-	1
AT1G60610.1	0.722877	0.215018	0.929886	0.429817	0.0190356	0.660317	0.0584061	0.603403	SBP (S-ribonuclease binding protein) family protein	1	-	-	-	-	1
AT4G38430.1	-0.0674283	-0.294083	0.119261	-0.154376	0.647714	0.0161567	0.643117	0.601558	rho guanyl-nucleotide exchange factor 1	-	1	-	-	-	1
AT5G48655.1	0.718761	0.245598	0.367195	0.23948	1.03995e-09	0.0902186	0.236999	0.601435	RING/U-box superfamily protein	-	1	-	-	-	1
AT5G53990.1	2.53242	0.884569	2.63117	1.28356	9.34983e-06	0.249604	0.0790581	0.601435	UDP-Glycosyltransferase superfamily protein	-	1	-	-	-	1
AT1G06570.1	3.6142	2.03557	0.921628	0.280743	6.99156e-58	8.67035e-19	0.00120483	0.601435	phytoene desaturation 1	-	1	-	-	-	1
AT5G66670.1	0.951461	2.92763	-0.294851	2.49731	0.0901675	5.33675e-12	0.963893	0.601329	Protein of unknown function (DUF677)	-	-	-	1	-	1
AT1G30510.2	-0.0572821	1.10902	-0.149263	0.233797	0.819506	7.58336e-11	0.721266	0.600627	root FNR 2	1	-	-	-	-	1
AT3G13435.1	-0.242677	-1.13678	0.055201	-4.59035	0.679477	0.0199707	NA	0.600534		-	-	1	-	-	1
AT2G23890.2	-0.868444	-0.335366	-0.409957	-0.231686	1.93765e-13	0.0090964	0.146595	0.600365		-	1	-	-	-	1
AT5G49710.3	1.04037	0.282906	0.758881	0.271673	1.62734e-09	0.219799	0.00837933	0.600054		-	-	1	-	-	1
AT5G24600.1	3.47068	2.05253	1.65815	1.36495	5.20352e-12	2.65104e-05	0.366876	0.599697	Protein of unknown function, DUF599	-	1	-	-	-	1
AT1G62640.1	0.453096	-0.0811798	-0.276318	-0.211759	6.16081e-05	0.672523	0.333103	0.599697	3-ketoacyl-acyl carrier protein synthase III	-	-	-	-	1	1
AT5G15330.2	-0.388256	-0.697609	0.0629471	-0.355156	0.125581	0.00596877	0.939537	0.599539		-	-	1	-	-	1
AT5G58060.2	0.450158	0.231968	0.122748	0.177592	3.90033e-08	0.011359	0.684776	0.599135	SNARE-like superfamily protein	-	-	-	-	1	1
AT3G56260.2	1.20784	0.564434	1.14421	0.505891	0.00242811	0.307197	0.0388403	0.598946		1	-	-	-	-	1
AT3G14910.1	0.396273	0.291578	0.454318	0.22161	0.00497281	0.0567455	0.0714962	0.597828		-	1	-	-	-	1
AT3G09520.1	3.21186	2.78423	-1.34103	-1.2604	1.43924e-09	9.84504e-08	0.470692	0.597806	exocyst subunit exo70 family protein H4	-	-	-	1	-	1
AT3G03450.1	-0.599007	-0.202071	0.430712	0.406088	0.00338067	0.467015	0.489706	0.597679	RGA-like 2	1	-	-	-	-	1
AT5G56290.1	0.52449	0.157469	0.162673	0.161097	1.44942e-10	0.129003	0.499136	0.597672	peroxin 5	-	-	1	-	-	1
AT3G47060.1	0.575473	0.23841	0.0677524	0.174213	1.26803e-05	0.149824	0.847255	0.595823	FTSH protease 7	-	1	-	-	-	1
AT3G60200.1	1.00707	0.147473	-0.199326	-0.260576	6.96636e-06	0.704278	0.640042	0.595823		-	1	-	-	-	1
AT1G79190.2	-0.51065	0.0541913	-0.32631	0.247056	0.000294188	0.835841	0.327188	0.595823		-	-	1	-	-	1
AT1G79150.1	-0.887909	0.103	-1.35806	-0.308408	2.54517e-09	0.689846	3.7065e-06	0.594973	binding	-	1	-	-	-	1
AT5G08620.1	-0.328405	-0.251416	-1.0834	-0.26805	0.00677515	0.0633742	2.84042e-05	0.594837	DEA(D/H)-box RNA helicase family protein	-	-	-	-	1	1
AT3G02220.1	-0.193511	0.114234	-0.496028	-0.21329	0.129625	0.504424	0.0343129	0.594496		1	-	-	-	-	1
AT1G76300.1	-0.400637	-0.0691883	-0.897121	-0.351511	0.101323	0.880369	0.0168285	0.594496	snRNP core protein SMD3	-	1	-	-	-	1
AT5G44720.1	-0.807118	-0.30473	0.0595634	0.298284	0.000577122	0.342729	0.930675	0.592372	Molybdenum cofactor sulfurase family protein	-	1	-	-	-	1
AT1G61690.1	0.695736	0.157085	0.378444	0.18619	1.46548e-09	0.342029	0.0741846	0.592353	phosphoinositide binding	-	-	1	-	-	1
AT1G67880.1	1.15997	0.475971	0.758132	0.300005	3.3542e-09	0.0393851	0.0172667	0.592353	beta-1,4-N-acetylglucosaminyltransferase family protein	-	1	-	-	-	1
AT5G43300.1	8.61232	10.1317	1.1222	1.53621	9.98788e-11	3.39281e-14	0.668193	0.591423	PLC-like phosphodiesterases superfamily protein	-	-	1	-	-	1
AT1G29880.1	-0.551486	0.0822731	-0.267955	-0.175076	2.9689e-05	0.721638	0.220587	0.591019	glycyl-tRNA synthetase / glycine--tRNA ligase	-	-	1	-	-	1
AT3G06490.1	4.73416	2.69673	-0.319135	-0.683949	2.20942e-19	9.44142e-09	0.811676	0.590084	myb domain protein 108	-	-	-	1	-	1
AT4G10790.1	0.431471	0.161184	0.0774892	0.119076	1.39016e-05	0.210205	0.701691	0.588743	UBX domain-containing protein	-	-	1	-	-	1
AT2G28080.1	-1.13894	-1.05909	-0.621385	-0.255317	7.08853e-14	5.57761e-12	0.0231904	0.588364	UDP-Glycosyltransferase superfamily protein	-	-	1	-	-	1
AT1G15080.1	-1.45683	0.499423	0.0526558	0.444485	0.00093807	0.282734	0.962602	0.588283	lipid phosphate phosphatase 2	1	-	-	-	-	1
AT3G20640.1	-0.126488	0.416887	-1.06777	-0.405937	0.823022	0.477025	0.0133676	0.587226	basic helix-loop-helix (bHLH) DNA-binding superfamily protein	-	1	-	-	-	1
AT1G50420.1	0.479135	-0.0158319	0.618905	0.381799	0.00122049	0.963349	0.183671	0.586391	scarecrow-like 3	-	-	-	-	1	1
AT3G58750.1	1.20409	0.413894	0.771749	0.179048	3.25873e-16	0.0173754	3.31212e-06	0.586391	citrate synthase 2	-	1	-	-	-	1
AT2G32980.1	0.439153	0.0131608	0.135484	-0.275101	0.00414949	0.969932	0.791404	0.585976		1	-	-	-	-	1
AT3G12080.1	-0.912384	-0.367538	-0.410039	-0.277895	3.37014e-08	0.0515568	0.239886	0.585435	GTP-binding family protein	-	-	1	-	-	1
AT3G02410.1	7.03563	4.59311	2.6042	0.90051	6.93397e-10	2.56782e-15	0.00313918	0.585435	alpha/beta-Hydrolases superfamily protein	-	1	-	-	-	1
AT4G36020.1	-0.60109	0.336836	-0.734123	-0.21271	0.000103272	0.0533375	0.000432746	0.585219	cold shock domain protein 1	-	1	-	-	-	1
AT3G61650.1	-0.717388	-0.00819727	-0.231707	-0.222951	5.226e-07	0.981365	0.470577	0.584612	gamma-tubulin	-	-	-	-	1	1
AT1G55540.2	-0.668712	-0.119047	-0.407728	0.200429	3.22496e-07	0.559278	0.069171	0.584498	Nuclear pore complex protein	-	-	1	-	-	1
AT3G61600.1	0.76468	0.231549	0.40992	0.174117	1.38058e-09	0.158592	0.0277691	0.584437	POZ/BTB containin G-protein 1	-	-	-	1	-	1
AT5G60790.1	0.58444	0.472892	0.0278938	0.158245	7.63102e-06	0.000691827	0.938719	0.58425	ABC transporter family protein	-	1	-	-	-	1
AT1G17530.1	0.349607	0.140459	0.457601	0.246746	0.0278727	0.541357	0.110334	0.583643	translocase of inner mitochondrial membrane 23	-	-	-	1	-	1
AT2G31970.1	-0.25087	-0.0244938	-0.466363	0.196583	0.103966	0.938452	0.0263912	0.583501	DNA repair-recombination protein (RAD50)	-	-	-	-	1	1
AT1G62030.1	2.68485	1.33048	0.255559	0.342522	8.31256e-05	0.052321	0.647623	0.582784	Cysteine/Histidine-rich C1 domain family protein	-	-	1	-	-	1
AT5G19850.1	1.36928	0.792746	0.773481	0.372177	4.87805e-10	0.000837996	0.0605741	0.582682	alpha/beta-Hydrolases superfamily protein	-	1	-	-	-	1
AT2G27200.1	0.676754	0.346809	0.401815	0.303867	2.70305e-06	0.0383212	0.309429	0.582576	P-loop containing nucleoside triphosphate hydrolases superfamily protein	-	1	-	-	-	1
AT5G20520.1	0.268861	-0.373865	0.158194	-0.178828	0.0390721	0.00462658	0.560846	0.581782	alpha/beta-Hydrolases superfamily protein	1	-	-	-	-	1
AT1G14290.1	0.620272	0.176068	0.219349	-0.381189	0.00254609	0.583396	0.742594	0.581612	sphingoid base hydroxylase 2	-	1	-	-	-	1
AT1G06700.1	0.512601	-0.0774926	0.32143	0.136038	5.66469e-11	0.53489	0.0266224	0.581428	Protein kinase superfamily protein	-	-	-	1	-	1
AT2G16740.1	1.03508	0.933209	0.228599	0.43857	1.86289e-05	0.000228352	0.775193	0.579536	ubiquitin-conjugating enzyme 29	-	-	-	-	1	1
AT5G12950.1	-0.584995	0.522494	0.300996	0.403532	0.0126482	0.0413102	0.6423	0.578964	Putative glycosyl hydrolase of unknown function (DUF1680)	1	-	-	-	-	1
AT5G20540.1	-0.72291	0.0303313	-0.320926	0.26883	0.00120151	0.950733	0.370422	0.578964	BREVIS RADIX-like 4	-	-	1	-	-	1
AT1G68400.1	-0.668982	0.0560148	-0.697271	-0.313789	0.00268143	0.901284	0.0388403	0.578964	leucine-rich repeat transmembrane protein kinase family protein	-	1	-	-	-	1
AT4G26690.1	1.16861	0.327856	0.323798	-0.268114	6.4709e-11	0.16267	0.364803	0.578592	PLC-like phosphodiesterase family protein	1	-	-	-	-	1
AT4G01560.1	-0.51628	0.0649405	-1.20531	-0.27139	0.00319314	0.846612	1.42543e-06	0.577887	Ribosomal RNA processing Brix domain protein	-	-	-	1	-	1
AT1G58200.1	1.20218	0.291205	0.545083	0.218134	4.22673e-32	0.013885	0.0151591	0.577879	MSCS-like 3	-	-	1	-	-	1
AT2G14510.2	-1.27681	-3.25244	-5.46982	-3.4844	0.171082	0.000225676	0.184742	0.57782		-	1	-	-	-	1
AT2G02640.1	-0.166582	-1.14335	0.052835	-2.05996	0.762647	0.0126129	0.987701	0.576567	Cysteine/Histidine-rich C1 domain family protein	1	-	-	-	-	1
AT2G19310.1	1.20469	1.25877	0.126647	0.343436	2.45723e-05	2.08303e-05	0.852031	0.575711	HSP20-like chaperones superfamily protein	-	1	-	-	-	1
AT5G56510.1	0.479939	6.13029	1.69588	4.31228	0.909857	0.0474565	0.833895	0.575711	pumilio 12	1	-	-	-	-	1
AT2G44770.1	0.821011	-0.119378	0.130751	-0.219449	1.02307e-19	0.38317	0.728472	0.575711	ELMO/CED-12 family protein	-	1	-	-	-	1
AT2G14720.1	0.32419	0.22066	0.274929	0.275393	0.00396182	0.0948194	0.485096	0.575711	vacuolar sorting receptor 4	-	-	-	-	1	1
AT5G04410.1	0.800043	0.132947	0.307559	0.202514	5.18014e-10	0.516772	0.209138	0.575711	NAC domain containing protein 2	-	1	-	-	-	1
AT3G15534.1	3.63209	3.71733	3.40252	1.36604	7.40572e-07	1.94932e-06	0.0201933	0.575711		-	-	-	-	1	1
AT3G16810.1	-0.93126	0.189981	-1.25042	-0.258896	5.43804e-12	0.309834	1.01038e-07	0.575618	pumilio 24	-	-	1	-	-	1
AT2G17790.1	0.407443	0.304208	0.165979	0.244652	2.64304e-06	0.000939975	0.677949	0.574463	VPS35 homolog A	-	1	-	-	-	1
AT4G28210.1	-0.585263	0.10608	-0.455937	-0.244385	0.00259882	0.724131	0.0987922	0.574422	embryo defective 1923	1	-	-	-	-	1
AT4G10750.1	0.210029	0.351564	-0.0418648	0.169661	0.172755	0.0216941	0.907283	0.574404	Phosphoenolpyruvate carboxylase family protein	-	-	1	-	-	1
AT3G62930.1	-1.1191	-0.708572	-1.15566	-0.501904	0.0184048	0.208975	0.0305341	0.573151	Thioredoxin superfamily protein	-	1	-	-	-	1
AT1G77855.1	-1.8977	-1.41885	0.261304	0.504726	4.84747e-07	0.000130172	0.769851	0.573105		-	-	1	-	-	1
AT5G02380.1	0.468126	1.15892	0.387127	0.397502	0.10305	1.53315e-05	0.497304	0.57294	metallothionein 2B	-	1	-	-	-	1
AT2G16460.1	0.650374	0.0262202	-0.117216	-0.227038	2.3151e-07	0.927634	0.76883	0.572591	Protein of unknown function (DUF1640)	-	-	-	-	1	1
AT1G58602.1	-0.39445	-0.528134	-0.89678	-0.415465	0.711852	0.695221	0.0442059	0.572591	LRR and NB-ARC domains-containing disease resistance protein	-	-	1	-	-	1
AT3G02530.1	-0.498223	-0.0853013	-0.554836	-0.182598	0.000978099	0.748157	0.0018873	0.572591	TCP-1/cpn60 chaperonin family protein	-	-	1	-	-	1
AT2G30110.1	0.705273	0.335728	0.281856	0.184765	4.608e-15	0.000746635	0.202645	0.571058	ubiquitin-activating enzyme 1	-	1	-	-	-	1
AT3G10330.1	0.182158	0.293367	0.371783	0.186749	0.209391	0.0452927	0.0683901	0.570767	Cyclin-like family protein	-	1	-	-	-	1
AT1G69310.1	1.65177	0.862365	0.469335	0.33469	2.03102e-11	0.001499	0.251477	0.570207	WRKY DNA-binding protein 57	1	-	-	-	-	1
AT4G24400.1	0.98547	0.440055	1.02446	0.392185	1.44819e-20	0.000144403	0.00939257	0.568825	CBL-interacting protein kinase 8	-	1	-	-	-	1
AT5G52830.1	-1.20789	-1.20708	-1.14507	-0.993061	6.30071e-05	9.4467e-05	0.382812	0.568681	WRKY DNA-binding protein 27	-	-	1	-	-	1
AT2G28070.1	-0.638899	-0.332086	-0.367783	0.25164	5.5727e-05	0.0701855	0.228082	0.568681	ABC-2 type transporter family protein	-	-	-	-	1	1
AT2G31280.3	0.568348	0.287572	0.12816	0.208016	0.00011301	0.101179	0.712784	0.568505	conserved peptide upstream open reading frame 7	-	-	-	-	1	1
AT1G15690.1	0.37768	0.24494	-0.137925	-0.253323	0.000143722	0.0310934	0.753897	0.566122	Inorganic H pyrophosphatase family protein	1	-	-	-	-	1
AT3G45650.2	-2.69671	-1.8435	-1.26074	-0.709676	2.21502e-22	6.00195e-11	0.116162	0.566116		1	-	-	-	-	1
AT1G52980.1	-0.0241754	-0.108692	-0.450532	-0.157558	0.844809	0.344856	0.00342822	0.565484	GTP-binding family protein	-	-	-	1	-	1
AT4G20910.1	0.496406	0.837705	0.0596378	0.245872	0.00497281	4.08373e-07	0.909713	0.56542	double-stranded RNA binding protein-related / DsRBD protein-related	-	-	-	1	-	1
AT4G04860.1	0.353603	0.117627	0.258018	0.221646	0.0301769	0.637933	0.370951	0.562444	DERLIN-2.2	-	-	-	-	1	1
AT1G60490.1	0.393561	0.110713	0.344137	0.278484	0.00634251	0.624568	0.334393	0.562296	vacuolar protein sorting 34	-	-	1	-	-	1
AT5G61950.1	-0.622532	-0.30604	-0.44269	-0.551503	0.0440814	0.442348	0.586689	0.560953	Ubiquitin carboxyl-terminal hydrolase-related protein	-	-	1	-	-	1
AT1G09660.1	-0.339945	-0.132728	-0.4452	-0.255178	0.002484	0.383661	0.118655	0.560913	RNA-binding KH domain-containing protein	-	-	1	-	-	1
AT3G01290.1	-1.252	-3.06966	-0.641307	-1.41406	0.0671522	1.69079e-06	0.803941	0.560885	SPFH/Band 7/PHB domain-containing membrane-associated protein family	-	-	1	-	-	1
AT3G18080.1	-0.970408	-0.0658562	0.346929	0.430279	0.000107836	0.898614	0.590709	0.560885	B-S glucosidase 44	-	-	1	-	-	1
AT2G31130.1	1.18672	0.720514	0.535892	0.311395	1.31211e-14	5.22487e-06	0.131278	0.560486		1	-	-	-	-	1
AT3G55970.1	1.06781	2.2375	2.34182	1.04915	0.657957	0.371051	0.033259	0.560291	jasmonate-regulated gene 21	-	-	-	-	1	1
AT4G37910.1	-0.652609	0.041499	-0.895243	-0.260432	0.00245191	0.930267	0.000207189	0.559403	mitochondrial heat shock protein 70-1	-	1	-	-	-	1
AT5G52820.1	-0.537734	-0.18796	-0.738344	-0.196454	0.000133868	0.323398	4.46183e-05	0.559396	WD-40 repeat family protein / notchless protein, putative	-	1	-	-	-	1
AT4G23920.1	1.94133	1.01734	0.765404	0.327879	1.36683e-15	8.57763e-05	0.0207001	0.55929	UDP-D-glucose/UDP-D-galactose 4-epimerase 2	-	1	-	-	-	1
AT1G16540.3	1.06029	0.296116	0.465323	0.408779	6.7016e-22	0.0242387	0.379369	0.558187		1	-	-	-	-	1
AT1G55380.1	-0.933527	-1.12574	-1.00972	-0.854513	3.29256e-05	2.4026e-06	0.352697	0.557669	Cysteine/Histidine-rich C1 domain family protein	-	-	-	-	1	1
AT5G59440.3	-0.0644028	-0.500181	0.0200008	-0.234643	0.832386	0.0352186	0.971744	0.556429	P-loop containing nucleoside triphosphate hydrolases superfamily protein	1	-	-	-	-	1
AT1G26910.1	-0.115941	0.0528508	-0.649413	-0.272222	0.63404	0.888869	0.0183329	0.556344	Ribosomal protein L16p/L10e family protein	-	1	-	-	-	1
AT3G29670.1	2.93357	0.676722	-0.457364	0.557597	7.08728e-05	0.562632	0.569153	0.556251	HXXXD-type acyl-transferase family protein	-	-	1	-	-	1
AT2G43210.1	0.237	-0.256008	0.241545	0.192554	0.016596	0.0141489	0.317097	0.555494	Ubiquitin-like superfamily protein	-	-	-	-	1	1
AT1G04250.1	0.0323777	-0.727812	0.453102	-0.349626	0.876848	7.67074e-08	0.288987	0.554593	AUX/IAA transcriptional regulator family protein	-	1	-	-	-	1
AT1G31420.1	-0.565388	-0.194637	-0.164289	-0.212998	5.86297e-07	0.179498	0.607174	0.554316	Leucine-rich repeat protein kinase family protein	-	1	-	-	-	1
AT1G60790.1	0.655383	0.142167	0.350762	0.316785	0.000174835	0.609517	0.394899	0.554316	Plant protein of unknown function (DUF828)	-	1	-	-	-	1
AT4G19500.1	0.348032	0.0365383	-0.248603	-0.157105	0.0207173	0.903122	0.163804	0.554227	nucleoside-triphosphatases;transmembrane receptors;nucleotide binding;ATP binding	-	-	1	-	-	1
AT3G53150.1	-0.632674	-2.14268	-0.739497	-2.56686	0.226407	3.28585e-05	0.884647	0.553726	UDP-glucosyl transferase 73D1	1	-	-	-	-	1
AT3G45780.1	-1.27165	-0.382064	-0.0413383	0.34486	7.05233e-23	0.00747463	0.958532	0.553454	phototropin 1	-	-	1	-	-	1
AT2G37600.1	-0.649446	-0.0622924	-0.743446	-0.321704	2.23109e-05	0.830975	0.0231247	0.553454	Ribosomal protein L36e family protein	-	-	1	-	-	1
AT3G45640.1	-1.56172	-0.888592	0.0190703	0.332138	6.42799e-15	1.85944e-05	0.979084	0.553077	mitogen-activated protein kinase 3	-	-	1	-	-	1
AT1G11580.2	-2.70978	-1.07952	-1.18664	-0.360353	1.60109e-41	5.08679e-07	0.000372849	0.552957		-	-	-	1	-	1
AT2G44230.1	1.97782	0.241377	0.566941	0.543813	1.49001e-19	0.49244	0.433764	0.552749	Plant protein of unknown function (DUF946)	-	1	-	-	-	1
AT3G12520.1	-0.712747	0.828041	0.425786	0.294854	0.000185204	2.35233e-06	0.217434	0.550762	sulfate transporter 4;2	-	-	-	1	-	1
AT1G08550.1	0.644352	0.298233	-0.119758	-0.40919	0.012916	0.38939	0.881895	0.550294	non-photochemical quenching 1	-	-	-	-	1	1
AT5G63550.2	-0.448794	0.058829	-0.396582	-0.300213	0.0134394	0.867422	0.271673	0.550134	DEK domain-containing chromatin associated protein	-	-	-	1	-	1
AT2G40090.1	0.483219	-0.00156564	-0.23956	-0.26115	0.00720727	0.996416	0.504217	0.550086	ABC2 homolog 9	-	-	-	1	-	1
AT4G24265.2	-1.40698	-0.602107	-0.116331	-0.568376	0.0111775	0.412799	0.923477	0.549865		-	-	-	1	-	1
AT5G03470.1	0.878865	0.320895	0.267512	0.394431	1.77111e-08	0.0969658	0.662053	0.549865	Protein phosphatase 2A regulatory B subunit family protein	1	-	-	-	-	1
AT2G29995.1	-0.959432	-1.05117	-0.413392	-1.29244	0.00234073	0.00133568	0.867095	0.549735		1	-	-	-	-	1
AT2G43160.1	0.289397	-0.17856	-0.174433	-0.196802	0.00288032	0.130119	0.530327	0.54964	ENTH/VHS family protein	-	-	1	-	-	1
AT3G07190.1	-0.744582	-0.171558	-0.562445	-0.299027	0.0004398	0.569093	0.0883435	0.54917	B-cell receptor-associated protein 31-like	-	-	-	-	1	1
AT1G18140.1	-0.961614	-0.931162	-0.724967	-0.966614	0.0246165	0.0500984	0.569153	0.548183	laccase 1	-	-	1	-	-	1
AT1G15740.1	1.14186	0.207231	0.707872	0.328632	2.28617e-08	0.518868	0.0346742	0.548108	Leucine-rich repeat family protein	-	1	-	-	-	1
AT2G26920.1	0.823578	0.421092	0.312716	0.171831	2.61013e-11	0.00195746	0.0875302	0.547918	Ubiquitin-associated/translation elongation factor EF1B protein	1	-	-	-	-	1
AT3G13560.1	-0.938188	-0.271676	-0.544872	-0.302545	1.74793e-08	0.203312	0.0961772	0.547262	O-Glycosyl hydrolases family 17 protein	-	-	-	1	-	1
AT3G12030.1	-0.459083	-0.0830632	-0.104028	-0.341152	6.0246e-05	0.645085	0.875207	0.546937	Protein of unknown function DUF106, transmembrane	-	-	-	1	-	1
AT5G50860.1	-0.625225	0.0524079	-0.0515367	0.161305	1.60097e-05	0.846612	0.866803	0.546937	Protein kinase superfamily protein	1	-	-	-	-	1
AT4G29070.1	0.807563	0.261549	0.477814	0.25787	0.00104362	0.458503	0.086254	0.546937	Phospholipase A2 family protein	-	-	1	-	-	1
AT2G03620.1	0.40603	0.202256	0.612893	0.277724	0.0276498	0.40181	0.0305607	0.546937	magnesium transporter 3	-	1	-	-	-	1
[truncated: 4,515 more rows]
